# Supplementary material for: Can a smartphone-delivered tool facilitate the assessment of surgical site infection and result in earlier treatment? Tracking wound infection with smartphone technology (TWIST): protocol for a randomised controlled trial in emergency surgery patients
Source: PubMed Central journal article supplement — BMJ Open. 2019 Oct 3;9(10):e029620. doi: 10.1136/bmjopen-2019-029620 (PMC6797297; doi:10.1136/bmjopen-2019-029620), 2019-10-03
Supplement: bmjopen-2019-029620.draft_revisions.pdf [file bmjopen-2019-029620.draft_revisions.pdf]

# BMJ Open

BMJ Open is committed to open peer review. As part of this commitment we make the peer review history of every article we publish publicly available.

When an article is published we post the peer reviewers' comments and the authors' responses online. We also post the versions of the paper that were used during peer review. These are the versions that the peer review comments apply to.

The versions of the paper that follow are the versions that were submitted during the peer review process. They are not the versions of record or the final published versions. They should not be cited or distributed as the published version of this manuscript.

BMJ Open is an open access journal and the full, final, typeset and author-corrected version of record of the manuscript is available on our site with no access controls, subscription charges or pay-per-view fees (<http://bmjopen.bmj.com>).

If you have any questions on BMJ Open's open peer review process please email [info.bmjopen@bmj.com](mailto:info.bmjopen@bmj.com)

# BMJ Open

**Can a smartphone-delivered tool facilitate the assessment of surgical site infection and result in earlier treatment? Tracking Wound Infection with Smartphone Technology (TWIST): a randomized-controlled trial in emergency surgery patients.**

|                               |                                                                                                                                                                                                                                                                                                                                                                                                                                                                                                                                                                                                                                                                                                                                                                                                                                                                                                                                                                                                                                                                                                                                                                                                                                                                                                                                                                                                                                                                                                                                                                                                                                                                                |
|-------------------------------|--------------------------------------------------------------------------------------------------------------------------------------------------------------------------------------------------------------------------------------------------------------------------------------------------------------------------------------------------------------------------------------------------------------------------------------------------------------------------------------------------------------------------------------------------------------------------------------------------------------------------------------------------------------------------------------------------------------------------------------------------------------------------------------------------------------------------------------------------------------------------------------------------------------------------------------------------------------------------------------------------------------------------------------------------------------------------------------------------------------------------------------------------------------------------------------------------------------------------------------------------------------------------------------------------------------------------------------------------------------------------------------------------------------------------------------------------------------------------------------------------------------------------------------------------------------------------------------------------------------------------------------------------------------------------------|
| Journal:                      | <i>BMJ Open</i>                                                                                                                                                                                                                                                                                                                                                                                                                                                                                                                                                                                                                                                                                                                                                                                                                                                                                                                                                                                                                                                                                                                                                                                                                                                                                                                                                                                                                                                                                                                                                                                                                                                                |
| Manuscript ID                 | bmjopen-2019-029620                                                                                                                                                                                                                                                                                                                                                                                                                                                                                                                                                                                                                                                                                                                                                                                                                                                                                                                                                                                                                                                                                                                                                                                                                                                                                                                                                                                                                                                                                                                                                                                                                                                            |
| Article Type:                 | Protocol                                                                                                                                                                                                                                                                                                                                                                                                                                                                                                                                                                                                                                                                                                                                                                                                                                                                                                                                                                                                                                                                                                                                                                                                                                                                                                                                                                                                                                                                                                                                                                                                                                                                       |
| Date Submitted by the Author: | 07-Feb-2019                                                                                                                                                                                                                                                                                                                                                                                                                                                                                                                                                                                                                                                                                                                                                                                                                                                                                                                                                                                                                                                                                                                                                                                                                                                                                                                                                                                                                                                                                                                                                                                                                                                                    |
| Complete List of Authors:     | McLean, Kenneth; University of Edinburgh, 51 Little France Crescent, Edinburgh, EH16 4SA, United Kingdom, Department of Clinical Surgery, Mountain, Katie; University of Edinburgh, 51 Little France Crescent, Edinburgh, EH16 4SA, United Kingdom, Department of Clinical Surgery, Shaw, Catherine; University of Edinburgh, 51 Little France Crescent, Edinburgh, EH16 4SA, United Kingdom, Department of Clinical Surgery, Drake, Thomas ; University of Edinburgh, 51 Little France Crescent, Edinburgh, EH16 4SA, United Kingdom, Department of Clinical Surgery, Ots, Riinu; University of Edinburgh, 51 Little France Crescent, Edinburgh, EH16 4SA, United Kingdom, Department of Clinical Surgery, Knight, Stephen; University of Edinburgh, 51 Little France Crescent, Edinburgh, EH16 4SA, United Kingdom, Department of Clinical Surgery, Fairfield, Cameron; University of Edinburgh, 51 Little France Crescent, Edinburgh, EH16 4SA, United Kingdom, Department of Clinical Surgery, Sgrò, Alessandro; University of Edinburgh, 51 Little France Crescent, Edinburgh, EH16 4SA, United Kingdom, Department of Clinical Surgery, Skipworth, Richard; University of Edinburgh, 51 Little France Crescent, Edinburgh, EH16 4SA, United Kingdom, Department of Clinical Surgery, Wigmore, Stephen; University of Edinburgh, 51 Little France Crescent, Edinburgh, EH16 4SA, United Kingdom, Department of Clinical Surgery, Potter, Mark; Western General Hospital, Crewe Rd S, Edinburgh, EH4 2XU, UK, Colorectal Unit<br>Harrison, Ewen ; University of Edinburgh, 51 Little France Crescent, Edinburgh, EH16 4SA, United Kingdom, Department of Clinical Surgery, |
| Keywords:                     | Surgical Site Infection, SURGERY, smartphone technology                                                                                                                                                                                                                                                                                                                                                                                                                                                                                                                                                                                                                                                                                                                                                                                                                                                                                                                                                                                                                                                                                                                                                                                                                                                                                                                                                                                                                                                                                                                                                                                                                        |
|                               |                                                                                                                                                                                                                                                                                                                                                                                                                                                                                                                                                                                                                                                                                                                                                                                                                                                                                                                                                                                                                                                                                                                                                                                                                                                                                                                                                                                                                                                                                                                                                                                                                                                                                |

SCHOLARONE™  
Manuscripts

1  
2  
3 **Can a smartphone-delivered tool facilitate the assessment of surgical**  
4 **site infection and result in earlier treatment? Tracking Wound Infection**  
5 **with Smartphone Technology (TWIST): a randomized-controlled trial in**  
6 **emergency surgery patients.**  
7  
8  
9  
10  
11  
12  
13  
14

15 **Trial Registration:** *ClinicalTrials.gov*. Reference No: NCT02704897  
16

17  
18 **Protocol version:** 2.0.  
19

20  
21 **Funding:** This research received no specific grant from any funding agency in the public,  
22 commercial or not-for-profit sectors.  
23  
24

25  
26 **Roles and responsibilities:**

27 McLean KA<sup>1</sup>, Mountain KE<sup>1</sup>, Shaw CA<sup>1</sup>, Drake TM<sup>1</sup>, Ots R<sup>1</sup>, Knight SR<sup>1</sup>, Fairfield CJ<sup>1</sup>, Sgrò  
28 A<sup>1</sup>, Skipworth RJE<sup>1</sup>, Wigmore SJ<sup>1</sup>, Potter M<sup>2</sup>, Harrison EM<sup>1</sup>  
29  
30

- 31 1. Department of Clinical Surgery, Royal Infirmary of Edinburgh, University of  
32 Edinburgh, Edinburgh, EH16 4SA, UK
- 33 2. Colorectal Unit, Western General Hospital, Crewe Rd S, Edinburgh, EH4 2XU, UK  
34  
35  
36  
37  
38

39 **Address for Correspondence**

40 Dr Kenneth A McLean  
41 Department of Clinical Surgery  
42 Royal Infirmary Edinburgh  
43 51 Little France Crescent  
44 Edinburgh  
45 EH16 4SA  
46 United Kingdom  
47  
48

49 Telephone: +44(0) 131 242 3614

50 Email: v1kmcle6@ed.ac.uk  
51  
52

53 **Keywords:** *Surgical Site Infection, smartphone technology, surgery*  
54

55 **MeSH Terms:** *Surgical Wound Infection\*, Diagnosis, Smartphone, General Surgery*  
56  
57  
58  
59  
60

## Abstract

## Introduction

National data suggest that surgical site infection (SSI) complicates 2-10% of general surgery cases, although the patient-reported incidence is much higher. SSIs cause significant patient morbidity and represent a significant burden on acute healthcare services, in a cohort predominantly suitable for outpatient management. Over three-quarters of UK adults now own smartphones, which could be harnessed to improve access to care. We aim to investigate if a smartphone-delivered wound assessment tool results in earlier treatment.

## Methods and Analysis

This is a randomised-controlled trial aiming to recruit 500 patients across NHS hospitals. All emergency abdominal surgery patients over the age of 16 who own smartphones will be considered eligible, with the exclusion of those with significant visual impairment.

Participants will be randomised in a 1:1 ratio between standard post-operative care and the intervention – use of the smartphone tool in addition to standard post-operative care. The main outcome measure will be time-to-diagnosis of SSI with secondary outcome measures considering use of A&E and GP services and patient experience. Follow-up will be conducted by clinicians blinded to group allocation. Analysis of time-to-diagnosis will be by comparison of means using a Mann-Whitney U-test.

## Ethics and Dissemination

This is the first randomised-controlled trial to evaluate the use of a smartphone-delivered wound assessment tool. The intervention is being used in addition to standard post-operative care. The study design and protocol were reviewed and approved by Southeast Scotland Research and Ethics Committee (REC Ref: 16/SS/0072 24/05/2016). Study findings will be presented at academic conferences, published in peer-reviewed journals,

1 and are expected in 2020. A written lay summary will be available to study participants on  
2  
3  
4 request.  
5  
6

## 7 **Trial Registration**

8

9  
10 *ClinicalTrials.gov*. Reference No: NCT02704897  
11  
12  
13  
14  
15  
16  
17  
18  
19  
20  
21  
22  
23  
24  
25  
26  
27  
28  
29  
30  
31  
32  
33  
34  
35  
36  
37  
38  
39  
40  
41  
42  
43  
44  
45  
46  
47  
48  
49  
50  
51  
52  
53  
54  
55  
56  
57  
58  
59  
60

For peer review only

## Strengths and Limitations of this Study:

- This is the first randomised controlled trial on the use of a smartphone-delivered tool facilitate the assessment of surgical site infection and the impact on time-to-diagnosis.
- There are broad eligibility criteria, and so it is expected the results will be generalisable to a wide population of patients undergoing abdominal surgery.
- Due to the nature of the intervention, only clinicians undertaking follow-up can be blinded to randomisation status.
- All patients will receive 30-day telephone or face-to-face follow-up to determine the occurrence of surgical site infections, however the gold-standard for diagnosis remains direct clinical assessment.
- Data on patient experience and acceptability of smartphone-delivered follow-up will be collected concurrently to guide future implementation of future telehealth interventions.

review only

## Introduction

Surgical site infection (SSI) complicates 2-10% of general surgical cases, with the highest rates of infection seen after colorectal surgery<sup>1</sup>. Infection and re-admission rates have not significantly changed in the last 10 years. The most common causative group is *Enterobacteriaceae* (25% of cases), with *Staph. Aureus* (10%) and MRSA (3%) accounting for a small proportion of overall cases<sup>1</sup>. National surveillance data from Scotland indicate that peak incidence of infection is between day 6-12 post-operatively<sup>2</sup>.

A recent study indicated that national reports may underestimate the true incidence of SSI, and suggested that patient reported SSI is a more sensitive measure<sup>3</sup>. Unpublished data from our own hospital indicates that up to 25% of patients report post-operative wound infections; approximately half of these require assessment by the surgical team, but less than 1% require admission. Many of these patients had already consulted their General Practitioner (GP) or attended the Accident and Emergency department (A&E). In addition, many patients have concerns about their wounds (in the absence of infection) and may experience delays in accessing appropriate medical assessment. Thus, SSI represents a significant burden on healthcare services, in a patient group who are predominantly appropriate for outpatient management.

There is currently an increased research focus on digital health: the use of communications technology to enhance healthcare, public health and delivery of health education<sup>4</sup>. There are several advantages to this approach, in particular the potential to improve access to care, and help streamline usage of emergency services. Indeed, there is evidence that these technologies have been used to improve outcome<sup>5</sup>, as well as to reduce specialist workload<sup>6</sup> and A&E attendances<sup>7</sup>. In addition, the increasing use of healthcare technology is likely to help improve automatic data collection and recording, which may be used to identify areas for future research and drive quality improvement<sup>4</sup>.

1  
2  
3  
4 Over three-quarters (78%) of UK adults now own smartphones <sup>8</sup>, with at least a third using  
5  
6 a smartphone as their primary device to access the internet <sup>4</sup>. Therefore, there is vast  
7  
8 potential for the use of smartphones in digital health. Given the frequency with which  
9  
10 patients report post-operative wound complications and the high incidence of SSI, we feel  
11  
12 that SSI represents a good candidate for a primary measure of outcome for research in  
13  
14 digital health. We aim to investigate if an online wound assessment tool can be used to help  
15  
16 diagnose SSI and improve patient access to care and clinical assessment. In addition, we  
17  
18 aim to investigate if this results in earlier intervention to treat SSI and a decreased  
19  
20 attendance at A&E and GPs. The widespread use of smartphones, the integrated nature of  
21  
22 their technology, and their portability means smartphones represent the best platform to  
23  
24 deliver this tool, with the aim of facilitating rapid access to clinical care.  
25  
26  
27  
28  
29  
30  
31  
32  
33  
34  
35  
36  
37  
38  
39  
40  
41  
42  
43  
44  
45  
46  
47  
48  
49  
50  
51  
52  
53  
54  
55  
56  
57  
58  
59  
60



## **Objectives**

This randomised-controlled trial will investigate whether a smartphone-delivered wound assessment tool can be used to diagnose wound infection and result in earlier treatment.

It will also assess for a reduction in A&E and GP attendances as a result of using the intervention. Data on patient experience will be used to evaluate perceived utility of the tool.

For peer review only

## Methods and Analysis

### Overview

This is a superiority randomised-controlled trial, using a parallel two-arm design (Figure 1).

Once consent is obtained, participants will be randomised in a 1:1 ratio to either the intervention arm (receiving standard post-operative care plus access to the smartphone-delivered wound assessment tool), or the control arm (standard post-operative care).

Patients will be recruited from the emergency surgery inpatient service across NHS Lothian.

The trial period will be 30 days. An internal pilot study in the first 80 patients recruited will be conducted to ensure the trial design is practical and deliverable. Following assessment of pilot data, there will be an opportunity to adapt the trial design in response to the pilot study findings. Participants will be followed-up by a researcher blinded to the intervention status.

The primary outcome measure will be the number of days from surgery to commencing treatment for SSI (time-to-diagnosis), with A&E and GP service use as a secondary outcome measure. Additional data regarding patient experience will also be collected from patients in both arms of the trial via a smartphone-delivered questionnaire at 30 days.

### Research Setting

This research is being carried out in a large health board, serving a mixed urban and rural population of over 800,000. The emergency surgery service admits 300 patients per week between participating sites and performs 2500 procedures annually.

### Participants

Emergency surgery in-patients who are adults (over age 16) and have undergone abdominal surgery (on the same admission as diagnosis) will be screened for eligibility.

Potentially eligible patients will be screened and documented as (a) eligible and included, (b) eligible and missed, (c) eligible and declined (iv) ineligible (visual impairment) (v) ineligible (no smartphone). Written consent will be obtained by the research team in line

1 with Good Clinical Practice Guidance. Participation is voluntary and a patient's decision  
2 regarding participation will not affect any aspect of their care in the case of refusal.  
3  
4  
5  
6 Participants will have the right to withdraw from the study at any point.  
7  
8  
9  
10

### 11 ***Inclusion Criteria***

12 Patients admitted to the emergency surgery inpatient service who meet the following criteria  
13 will be included in the study:  
14  
15

- 16 • Emergency surgery in-patients who have undergone abdominal surgery;
- 17 • Owners of a smartphone, with access to internet;
- 18 • Adults over the age over 16;
- 19 • Able to give informed consent.
- 20
- 21
- 22
- 23
- 24
- 25
- 26
- 27
- 28
- 29
- 30

### 31 ***Exclusion Criteria***

32 Any patients with significant visual impairment preventing use of the online questionnaire  
33 will be excluded from the study (defined by self-reporting of the patient)  
34  
35  
36  
37  
38  
39

### 40 ***Study Procedures***

#### 41 **Recruitment**

42 The clinical team will inform potentially eligible patients about the on-going trial, and offer  
43 them further information (written and verbal from the research team). Eligible patients will  
44 be recruited as in-patients, with formal written consent taken by a member of the research  
45 team. Baseline information gathered will include: reason for admission, index procedure  
46 and date, significant co-morbidities – including history of diabetes or immunosuppression,  
47 as well as age and BMI. Participant contact details (mobile telephone number) will be  
48 entered into a secure, online data collection tool (Research Electronic Data Capture  
49 (REDCap) database) <sup>9</sup>.  
50  
51  
52  
53  
54  
55  
56  
57  
58  
59  
60

## Randomisation and Blinding

Participants will be assigned in a 1:1 ratio to the intervention or control arms and provided with the appropriate information packs prior to discharge. Randomization en-bloc will be carried out using REDCap<sup>9</sup>, utilising a computer-generated random number sequence. The emergency surgery nurses (who will provide care to patients as required during the trial), and those taking consent (which may include medical students and qualified clinicians) will not be blinded. The clinicians undertaking follow-up will be blinded to status. A trial entry will be made in the clinical notes, including contact details for the trial team should a member of the clinical team require more information or wish to discover their trial status.

## Intervention

### Smartphone-Delivered Wound Assessment Tool

A wound-based instrument to detect potential wound infection was developed. Our smartphone-delivered wound assessment model was based on the Centre for Disease Control and Prevention (CDC) classification criteria, and the ASEPSIS model (Additional treatment, Serous discharge, Erythema, Purulent exudate, and Separation of the deep tissues, the Isolation of bacteria, and the duration of Inpatient Stay).<sup>10 11</sup> It detects symptoms of SSI and symptoms of systemic illness as a result of this, whilst being quick and simple to use (Table 1).

Participants will have access to the smartphone-delivered wound assessment tool on discharge via a link sent by short-messaging system (SMS) to their smartphones. If at any time they have concerns about their wound, they can access the tool, and will be advised based on their responses. When a patient response is submitted, the research team will be automatically notified, and prompted to reply (Figure 2).

1  
2 In addition, a link to the smartphone-delivered wound assessment tool will be sent on days  
3  
4 3, 7, and 15 post-operatively. These time-points have been selected to include peak  
5  
6 incidence of infection and cover the time-course of wound healing. This will ensure the  
7  
8 collection of negative data in those without symptoms and will therefore assist in  
9  
10 determining the specificity of the tool. If participants do not respond they will be sent a  
11  
12 single reminder at these time-points.  
13  
14  
15  
16  
17  
18

### 19 **Wound Photographs**

20 Participants will be asked to upload at least one photograph of their wound each time they  
21  
22 use the smartphone-delivered wound assessment tool. These will be reviewed by a clinical  
23  
24 researcher and assigned into one of 3 categories: no concerns, medium-risk, high-risk.  
25  
26 Further machine learning-based assessment of wound photographs will be investigated.  
27  
28  
29  
30  
31  
32

### 33 **Responses**

34 An experienced clinician will review all participant responses and photographs in real-time.  
35  
36 Based on the response and the wound photographs, they will contact the patient by SMS  
37  
38 with advice regarding the need for further assessment. The clinician will classify participants  
39  
40 into 3 groups: no concern, medium-risk, high-risk. These three groups were agreed  
41  
42 collectively by the researchers in collaboration with the emergency surgical team. Three  
43  
44 potential outcomes were identified: (i) the patient does not require further assessment (no  
45  
46 concern), (ii) the patient requires further assessment, but the symptoms identified suggest a  
47  
48 mild infection (medium-risk), (iii) the symptoms suggest a potentially severe infection  
49  
50 requiring urgent assessment (high-risk). The wound photographs will also be reviewed by  
51  
52 the clinical researcher where available and classified into the same 3 groups. This may be  
53  
54 used by the researcher to refine their response to the tool, if they consider this necessary.  
55  
56  
57  
58  
59  
60

## Algorithm

An algorithm has been designed to classify participant responses into the same 3 categories listed above. This will be run on all participant responses (but will not impact on care), and will be compared with clinician rating, as a secondary sub-study. The correlation between clinician response, algorithm response and photo response will be used to determine if the algorithm can be used to assess for SSI independent of the responsible doctor.

## Action from Response

Participants whose responses raise no concerns will be advised of this. Participants who report symptoms consistent with wound infection will be directed for further assessment. Those in the medium-risk group will be directed to community care whilst those in the high-risk group will be advised to return for assessment at the centre where they had their procedure. This advice aligns to the degree of concern identified above.

## Wound Reviews

For those in the intervention group who are identified as high-risk, the emergency surgery nurses will collect a wound swab from the patient to test for causative organisms (and aid in confirming infection). If a wound infection is diagnosed clinically, the patient will be started with antibiotics in line with local guidelines. This will be logged in the patient's trial record. If any patients in the control group attend the emergency surgery service for a review the same procedures will apply.

GPs will be informed about their patient's participation in the trial. We will request that if a participant enrolled in the trial visits their GP a wound swab is taken, and that they are treated in line with the GP's normal practice. This will also apply to those in the medium-risk group who will be directed to their GP.

1  
2  
3  
4 All participants will be given a log to take to any wound reviews. If an infection is diagnosed  
5  
6 the date treatment commenced will be noted, alongside any intervention performed. This  
7  
8 will then be returned to the trial team, and used in follow-up.  
9

### 10 11 12 13 14 **30 Day Follow-up**

15 Both arms will receive a follow-up face-to-face or telephone consultation 30 days post-  
16  
17 operatively (alternatively, written follow-up is also available for those with significant hearing  
18  
19 impairment). This consultation will follow a standardized format and will be conducted with  
20  
21 the clinical researcher blinded to the intervention status. The clinical researcher will gather  
22  
23 data on post-operative course, any symptoms related to the wound, and any treatment  
24  
25 offered. They will have access to the results system and any wound logs returned. On the  
26  
27 basis of all this information, two independent, blinded researchers will determine if an  
28  
29 infection has been present (trained using the CDC Criteria to diagnose infection).<sup>10</sup> Data on  
30  
31 patient experience and service usage – A&E and GP attendances, as well as contact with  
32  
33 emergency surgery nurses – will also be collected via a separate questionnaire delivered  
34  
35 alongside the 30 day follow-up.  
36  
37  
38  
39  
40  
41  
42  
43  
44  
45

### 46 **Data Analysis Plan**

47 All analysis will be carried out on an intention-to-treat basis. We do not anticipate missing  
48  
49 data in patient demographics. However, any missing data values will be handled using  
50  
51 multiple imputation. The volume of missing outcome data will be recorded for the control  
52  
53 and intervention arms, and any differences in drop-out rate noted. Thereafter patients with  
54  
55 missing outcome data will be excluded from analysis.  
56  
57  
58  
59  
60

## Outcome Measures

This is a superiority RCT, and the primary outcome will be time from operation to diagnosis (time-to-diagnosis) of SSI. This point has been chosen (rather than time from symptom onset), as it can be more accurately recorded and is a measure of improved access to care. We assume an equal incidence of SSI in both groups and will ensure this using odds ratios. Time-to-diagnosis will be compared using Cox proportional hazard regression analysis, a  $P$  value of  $<0.05$  will be considered statistically significant.

For the intervention, we will calculate the sensitivity and specificity of the researcher response, the algorithm response, and photograph response in the diagnosis of SSI. We will compare the correlation of the algorithm, which is based on questionnaire responses, with clinician advice and eventual diagnosis. Correlation analysis will be performed using Kendall tau rank test. This will assess the accuracy of the algorithm in stratifying risk, as compared to a clinician, and will indicate what additional benefit may be gained from photographic analysis.

The secondary outcome measure will be use of services: GP and A&E attendances, as well as contact with emergency surgery nurses. This data will be gathered at 30 days.

Differences in number of attendees to GP and A&E will be compared using a  $\chi^2$  test.

Differences in the number of attendances will be assessed using the Mann-Whitney U-test.

Data on patient experience will also be gathered via a follow-up questionnaire and analysed separately. This will help determine if an online questionnaire delivered via a smartphone has a positive impact on patient experience of care, and if it helped facilitate their access to care.



## Sample Size and Power Analysis

Our primary outcome measure is time-to-diagnosis and we aim to detect a one-day difference with a power of 90% (alpha 0.05). Assuming a standard deviation of 1 day in time-to-diagnosis, 22 wound infections per group will be required. Estimating a 10% rate of wound infection (in line with National Data)<sup>2</sup> and a drop-out rate of 10%, a sample size of 490 will be required (recruitment target 500 patients). Analyses will be intention-to-treat.

Assuming that 50 operations are performed per week and two thirds of these patients are likely to own smartphones, we estimate there will be 30 potentially eligible patients per week. Aiming for recruitment of 25% of eligible patients, we estimate a continuous recruitment time of 16 months. This rate of recruitment will also enable the researcher to respond to all patient concerns in a timely manner.

## Ethics and dissemination:

### Safety

All participants will receive the normal standard of care. The smartphone-based intervention is in addition to the normal standard of care. If at any point participants have any concerns they will be advised to contact the emergency surgery nurses regarding their care (in line with normal standard of care). Out-of-hours they will be advised to contact NHS out-of-hours services. Participants will be advised to contact the emergency surgery nurses if they have any concerns whilst they are awaiting a response to the tool. The research team will be notified automatically that a participant is awaiting a response, ensuring that in normal working hours patients receive a rapid reply. They will also be advised that if they access the tool at night, that it will not be reviewed until the following day. They will be advised to contact out-of-hours services if they require an overnight assessment. These actions will prevent any harm to patients resulting from a delayed response to the wound assessment

1  
2 tool. Due to the low-risk nature of the trial, a formal data-monitoring committee has not been  
3  
4 nominated.

### 5 6 7 8 9 **Data Protection and Management**

10 All participant data will be stored securely in a REDCap<sup>9</sup> database that has controlled  
11  
12 access and is password protected. This data will be anonymised, and only available to  
13  
14 researchers listed on the protocol. Participant responses to the questionnaire will be  
15  
16 reported directly to the REDCap database and will not be stored on patient phones.  
17  
18

19 However, patients will be advised to review the security setting on their phone if they intend  
20  
21 to store their wound photographs. Patient details will be recorded in a trial log should any  
22  
23 safety concerns arise necessitating they be contacted.  
24  
25  
26  
27  
28  
29

### 30 31 **Ethical Approval and Dissemination Plan**

32  
33 The study design and protocol were reviewed and approved by Southeast Scotland  
34  
35 Research and Ethics Committee (REC Ref: 16/SS/0072 24/05/2016), and any protocol  
36  
37 amendments will be resubmitted for review. The study is sponsored by ACCORD, a  
38  
39 collaboration between the University of Edinburgh and NHS Lothian Research and  
40  
41 Development. In line with Good Clinical Practice Guidance, written consent will be obtained  
42  
43 by appropriately trained medical students or clinicians. Participation is voluntary and a  
44  
45 patient's decision regarding participation will not affect any aspect of their care in the case  
46  
47 of refusal. Participants will have the right to withdraw from the study at any point.  
48  
49  
50  
51  
52  
53

54 Authorship on any papers derived from the study will be all authors involved in study design  
55  
56 and protocol development, and any additional researchers involved in the writing group.  
57

58 Furthermore, patient recruiters who have recruited more than the prespecified 15 patients  
59  
60

1 to the study will be listed as a “collaborator”. All other persons involved in the study will be  
2  
3 listed in the acknowledgements.  
4  
5  
6  
7

8 There are no financial and other competing interests for principal investigators for the  
9  
10 overall trial or either study site. Study findings will be reported in line with CONSORT  
11  
12 guidelines, and disseminated in the printed media, and learned forums, and are expected in  
13  
14 2020. A written lay summary will be available to study participants on request.  
15  
16  
17

### 18 ***Patient and Public Involvement***

19 Patients were not directly involved in the design or delivery of this trial, however data on  
20  
21 patient experience in using the smartphone tool will be evaluated via a follow-up  
22  
23 questionnaire. This will inform future development and dissemination of this intervention. A  
24  
25 summary of results will be provided to all patients involved once the trial has been  
26  
27 completed and analysed.  
28  
29  
30  
31  
32  
33  
34  
35  
36  
37  
38  
39  
40  
41  
42  
43  
44  
45  
46  
47  
48  
49  
50  
51  
52  
53  
54  
55  
56  
57  
58  
59  
60

## Authors' Contributions

The study methods and protocol were developed jointly by the all authors. All authors assisted in review of the final write-up.

## Funding

This research received no specific grant from any funding agency in the public, commercial or not-for-profit sectors.

## Competing interests

The authors do not have any conflicts of interest to declare.

**Word Count: 3,064**

For peer review only

## Tables

Table 1: Questions included in smartphone-delivered questionnaire

| <b>Smartphone-delivered wound assessment</b>                                                                     |
|------------------------------------------------------------------------------------------------------------------|
| Is the pain worse than immediately after the operation?                                                          |
| Is there liquid coming from the wound site?                                                                      |
| Please select which option best describes the liquid: clear, yellowish, thick and yellow, bloody, green or brown |
| Is there new redness around your wound site excluding the wound itself?                                          |
| Is there more swelling around your wound site than at the time of surgery?                                       |
| Are you experiencing a new burning sensation or heat at the wound site?                                          |
| Is your wound opening or gaping?                                                                                 |
| Have you experienced fevers in the last 24 hours?                                                                |
| Please upload a photograph of your wound.                                                                        |

# Figures

**Figure 1:** Schema of trial events for intervention and control arms

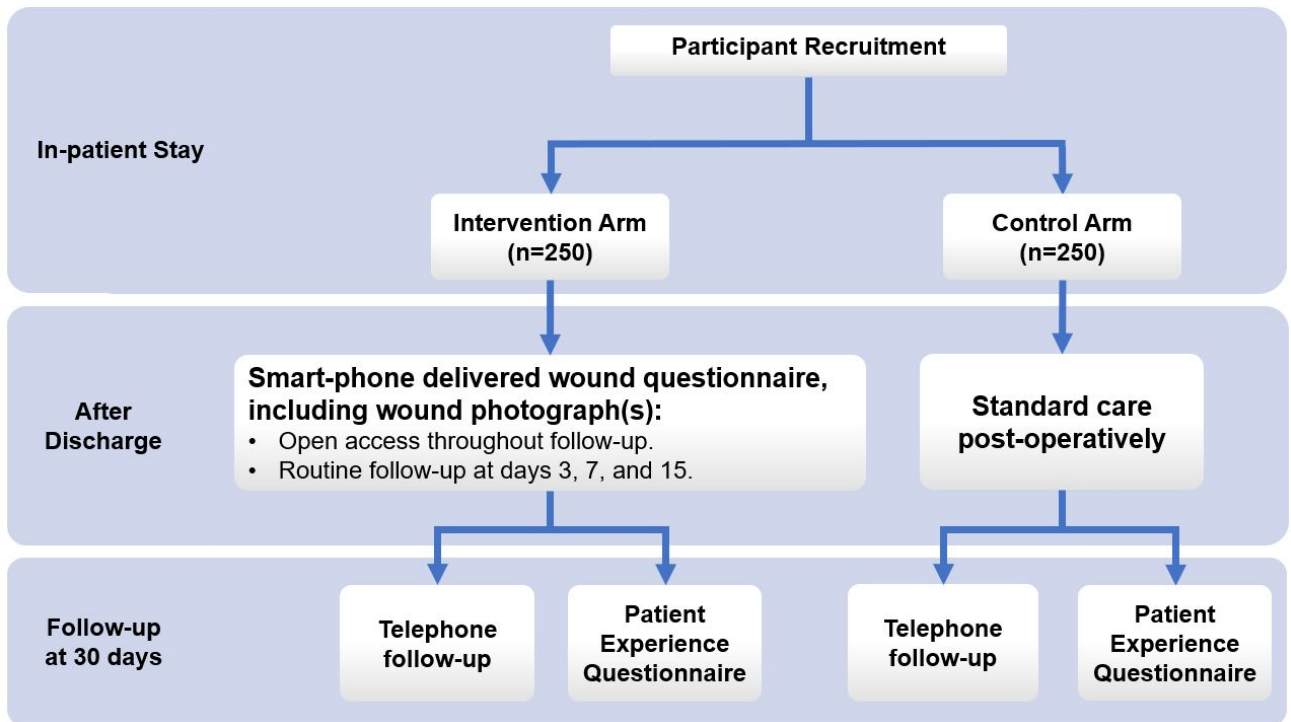

**Figure 2:** Handling of wound questionnaire submissions

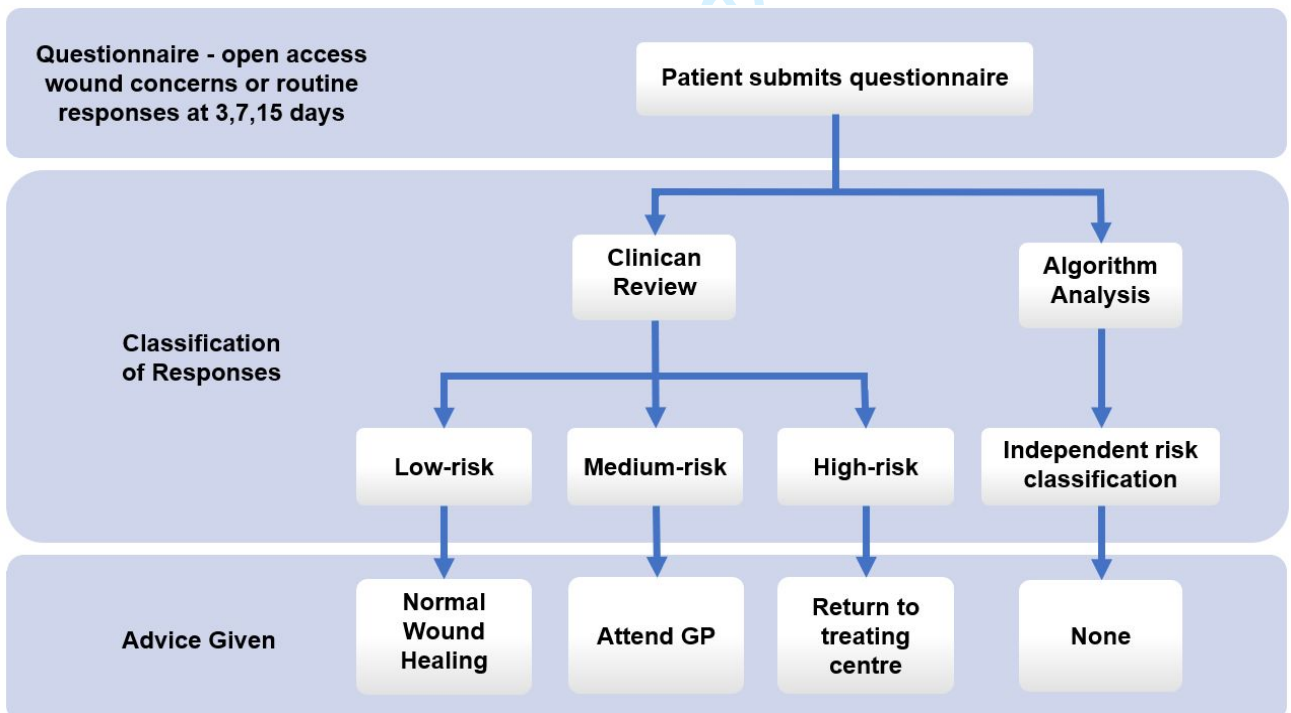

## References:

1. Public Health England. Surgical site infection surveillance service (SSISS). 2014
2. Health Protection Scotland (HPS). Scottish surveillance of healthcare associated infection Programme (SSHAIP). 2012
3. Pham JC, Ashton MJ, Kimata C, et al. Surgical site infection: Comparing surgeon versus patient self-report. *Journal of Surgical Research* 2016;202(1):95-102. doi: 10.1016/j.jss.2015.12.039
4. Imison C, Castle-Clarke S, Watson R, et al. Delivering the benefits of digital health care research summary, 2016.
5. Zhou YY, Kanter MH, Wang JJ, et al. Improved quality at Kaiser Permanente through e-mail between physicians and patients. *Health Affairs* 2010;29(7):1370-75. doi: 10.1377/hlthaff.2010.0048
6. Caffery L, Smith A. A Literature Review of Email-based Telemedicine. *Studies in Health Technology and Informatics* 2010;161:20-34.
7. Hex N, Tuggey J, Wright D, et al. Telemedicine in care homes in Airedale, Wharfedale and craven. *Clinical Governance: An International Journal* 2015;20(3):146-54. doi: 10.1108/cgij-07-2015-0022
8. Office of Communications (OFCOM). Communications Market Report 2018. London: OFCOM, 2019.
9. Harris PA, Taylor R, Thielke R, et al. Research electronic data capture (REDCap)—A metadata-driven methodology and workflow process for providing translational research informatics support. *Journal of Biomedical Informatics* 2009;42(2):377-81. doi: <http://dx.doi.org/10.1016/j.jbi.2008.08.010>
10. Centre for Disease Control and Prevention (CDC) National Healthcare Safety Network (NHSN). Patient Safety Component (PSC) Manual Chapter 9: Surgical site infection (SSI) event. In: CDC, ed. Atlanta: CDC, 2016.
11. Wilson APR, Sturridge MF, Treasure T, et al. A scoring method (ASEPSIS) for postoperative wound infections for use in clinical trials of antibiotic prophylaxis. *The Lancet* 1986;327(8476):311-12. doi: 10.1016/s0140-6736(86)90838-x

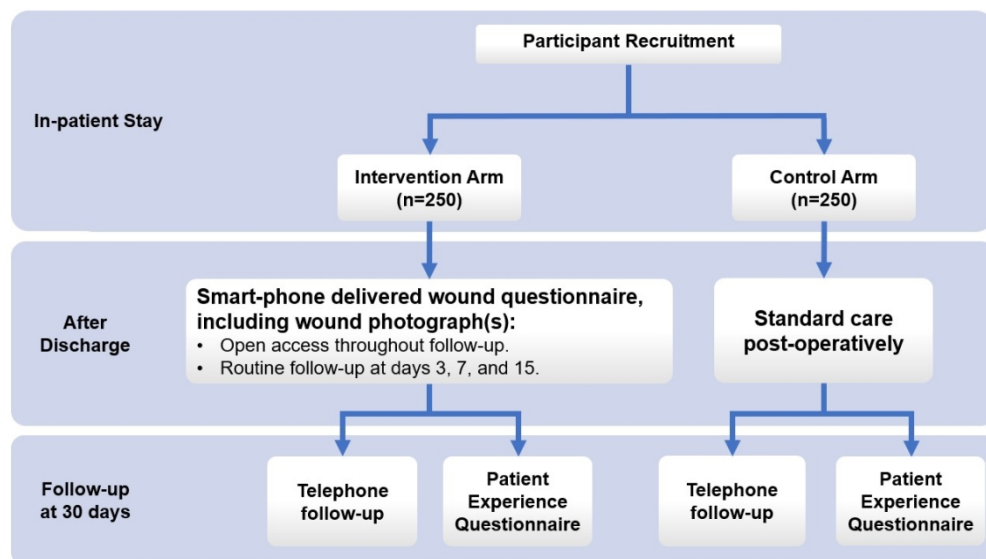

Figure 1: Schema of trial events for intervention and control arms

812x453mm (120 x 120 DPI)



1  
2  
3  
4  
5  
6  
7  
8  
9  
10  
11  
12  
13  
14  
15  
16  
17  
18  
19  
20  
21  
22  
23  
24  
25  
26  
27  
28  
29  
30  
31  
32  
33  
34  
35  
36  
37  
38  
39  
40  
41  
42  
43  
44  
45  
46  
47  
48  
49  
50  
51  
52  
53  
54  
55  
56  
57  
58  
59  
60

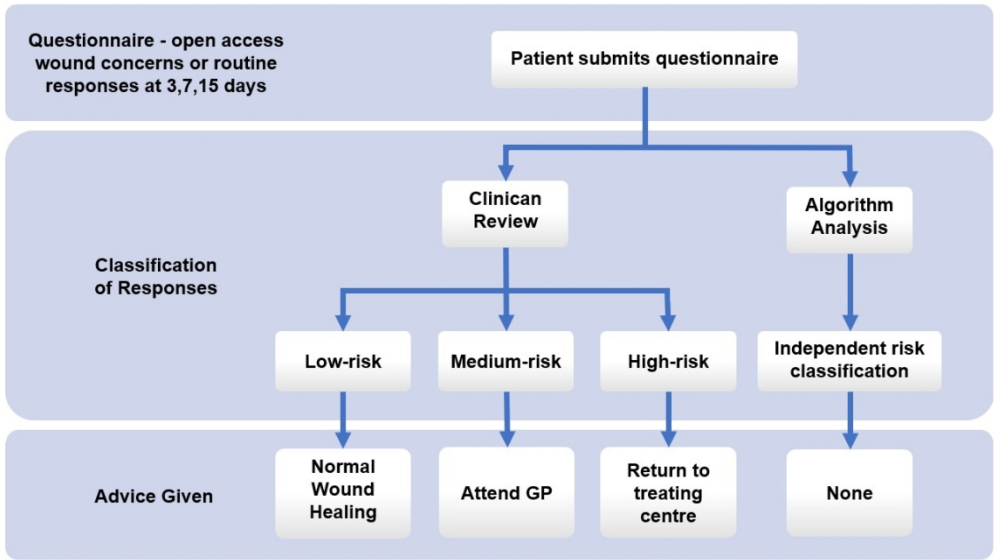

Figure 2: Handling of wound questionnaire submissions

811x454mm (120 x 120 DPI)

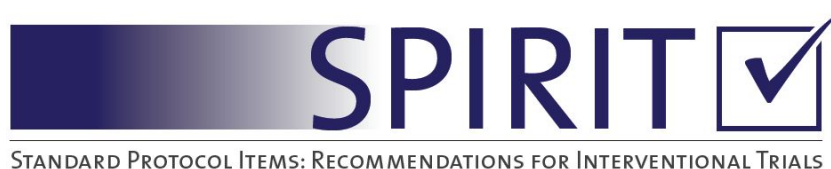

SPIRIT 2013 Checklist: Recommended items to address in a clinical trial protocol and related documents\*

| Section/item                      | Item No | Description                                                                                                                                                                                                                                                                                                                                                                |
|-----------------------------------|---------|----------------------------------------------------------------------------------------------------------------------------------------------------------------------------------------------------------------------------------------------------------------------------------------------------------------------------------------------------------------------------|
| <b>Administrative information</b> |         |                                                                                                                                                                                                                                                                                                                                                                            |
| Title                             | 1       | Descriptive title identifying the study design, population, interventions, and, if applicable, trial acronym<br><br><b>Can a smartphone-delivered tool facilitate the assessment of surgical site infection and result in earlier treatment? Tracking Wound Infection with Smartphone Technology (TWIST): a randomized-controlled trial in emergency surgery patients.</b> |
| Trial registration                | 2a      | Trial identifier and registry name. If not yet registered, name of intended registry.<br><b>ClinicalTrials.gov. Reference No: NCT02704897</b>                                                                                                                                                                                                                              |
|                                   | 2b      | All items from the World Health Organization Trial Registration Data Set<br><b>ClinicalTrials.gov. Reference No: NCT02704897</b>                                                                                                                                                                                                                                           |
| Protocol version                  | 3       | Date and version identifier<br><b>Page 1</b>                                                                                                                                                                                                                                                                                                                               |
| Funding                           | 4       | Sources and types of financial, material, and other support<br><b>Page 1</b>                                                                                                                                                                                                                                                                                               |
| Roles and responsibilities        | 5a      | Names, affiliations, and roles of protocol contributors<br><b>Page 1</b>                                                                                                                                                                                                                                                                                                   |
|                                   | 5b      | Name and contact information for the trial sponsor<br><b>Page 1</b>                                                                                                                                                                                                                                                                                                        |
|                                   | 5c      | Role of study sponsor and funders, if any, in study design; collection, management, analysis, and interpretation of data; writing of the report; and the decision to submit the report for publication, including whether they will have ultimate authority over any of these activities<br><b>Page 1</b>                                                                  |

- 1  
2  
3  
4  
5  
6  
7  
8  
9
- 5d Composition, roles, and responsibilities of the coordinating centre, steering committee, endpoint adjudication committee, data management team, and other individuals or groups overseeing the trial, if applicable (see Item 21a for data monitoring committee)  
**Page 1**

## Introduction

- 10  
11  
12  
13  
14  
15  
16  
17  
18  
19  
20  
21  
22  
23  
24  
25  
26  
27  
28
- Background and rationale 6a Description of research question and justification for undertaking the trial, including summary of relevant studies (published and unpublished) examining benefits and harms for each intervention  
**Page 5-6**
- 6b Explanation for choice of comparators  
**Page 5-6**
- Objectives 7 Specific objectives or hypotheses  
**Page 7**
- Trial design 8 Description of trial design including type of trial (eg, parallel group, crossover, factorial, single group), allocation ratio, and framework (eg, superiority, equivalence, noninferiority, exploratory)  
**Page 8 (overview)**

## Methods: Participants, interventions, and outcomes

- 29  
30  
31  
32  
33  
34  
35  
36  
37  
38  
39  
40  
41  
42  
43  
44  
45  
46  
47  
48  
49  
50  
51  
52  
53  
54  
55  
56  
57  
58  
59  
60
- Study setting 9 Description of study settings (eg, community clinic, academic hospital) and list of countries where data will be collected. Reference to where list of study sites can be obtained  
**Page 8 (research setting)**
- Eligibility criteria 10 Inclusion and exclusion criteria for participants. If applicable, eligibility criteria for study centres and individuals who will perform the interventions (eg, surgeons, psychotherapists)  
**Page 8-9 (Patients, inclusion criteria, exclusion criteria)**
- Interventions 11a Interventions for each group with sufficient detail to allow replication, including how and when they will be administered.  
**Page 10-13**
- 11b Criteria for discontinuing or modifying allocated interventions for a given trial participant (eg, drug dose change in response to harms, participant request, or improving/worsening disease).  
**Page 17**
- 11c Strategies to improve adherence to intervention protocols, and any procedures for monitoring adherence (eg, drug tablet return, laboratory tests).  
**N/A**

|    |                      |     |                                                                                                                                                                                                                                                                                                                                                                                |
|----|----------------------|-----|--------------------------------------------------------------------------------------------------------------------------------------------------------------------------------------------------------------------------------------------------------------------------------------------------------------------------------------------------------------------------------|
| 1  |                      |     |                                                                                                                                                                                                                                                                                                                                                                                |
| 2  |                      | 11d | Relevant concomitant care and interventions that are permitted or prohibited during the trial                                                                                                                                                                                                                                                                                  |
| 3  |                      |     | <b>N/A</b>                                                                                                                                                                                                                                                                                                                                                                     |
| 4  |                      |     |                                                                                                                                                                                                                                                                                                                                                                                |
| 5  |                      |     |                                                                                                                                                                                                                                                                                                                                                                                |
| 6  | Outcomes             | 12  | Primary, secondary, and other outcomes, including the specific measurement variable (eg, systolic blood pressure), analysis metric (eg, change from baseline, final value, time to event), method of aggregation (eg, median, proportion), and time point for each outcome. Explanation of the clinical relevance of chosen efficacy and harm outcomes is strongly recommended |
| 7  |                      |     | <b>Page 14 (outcome measures)</b>                                                                                                                                                                                                                                                                                                                                              |
| 8  |                      |     |                                                                                                                                                                                                                                                                                                                                                                                |
| 9  |                      |     |                                                                                                                                                                                                                                                                                                                                                                                |
| 10 |                      |     |                                                                                                                                                                                                                                                                                                                                                                                |
| 11 |                      |     |                                                                                                                                                                                                                                                                                                                                                                                |
| 12 |                      |     |                                                                                                                                                                                                                                                                                                                                                                                |
| 13 |                      |     |                                                                                                                                                                                                                                                                                                                                                                                |
| 14 |                      |     |                                                                                                                                                                                                                                                                                                                                                                                |
| 15 | Participant timeline | 13  | Time schedule of enrolment, interventions (including any run-ins and washouts), assessments, and visits for participants. A schematic diagram is highly recommended (see Figure)                                                                                                                                                                                               |
| 16 |                      |     | <b>Figure 1</b>                                                                                                                                                                                                                                                                                                                                                                |
| 17 |                      |     |                                                                                                                                                                                                                                                                                                                                                                                |
| 18 |                      |     |                                                                                                                                                                                                                                                                                                                                                                                |
| 19 |                      |     |                                                                                                                                                                                                                                                                                                                                                                                |
| 20 |                      |     |                                                                                                                                                                                                                                                                                                                                                                                |
| 21 | Sample size          | 14  | Estimated number of participants needed to achieve study objectives and how it was determined, including clinical and statistical assumptions supporting any sample size calculations                                                                                                                                                                                          |
| 22 |                      |     | <b>Page 15 (Sample Size and Power Analysis).</b>                                                                                                                                                                                                                                                                                                                               |
| 23 |                      |     |                                                                                                                                                                                                                                                                                                                                                                                |
| 24 |                      |     |                                                                                                                                                                                                                                                                                                                                                                                |
| 25 |                      |     |                                                                                                                                                                                                                                                                                                                                                                                |
| 26 |                      |     |                                                                                                                                                                                                                                                                                                                                                                                |
| 27 | Recruitment          | 15  | Strategies for achieving adequate participant enrolment to reach target sample size.                                                                                                                                                                                                                                                                                           |
| 28 |                      |     | <b>Page 9 (Recruitment)</b>                                                                                                                                                                                                                                                                                                                                                    |
| 29 |                      |     |                                                                                                                                                                                                                                                                                                                                                                                |
| 30 |                      |     |                                                                                                                                                                                                                                                                                                                                                                                |

### Methods: Assignment of interventions (for controlled trials)

#### Allocation:

|    |                                  |     |                                                                                                                                                                                                                                                                                                                                                          |
|----|----------------------------------|-----|----------------------------------------------------------------------------------------------------------------------------------------------------------------------------------------------------------------------------------------------------------------------------------------------------------------------------------------------------------|
| 31 |                                  |     |                                                                                                                                                                                                                                                                                                                                                          |
| 32 |                                  |     |                                                                                                                                                                                                                                                                                                                                                          |
| 33 |                                  |     |                                                                                                                                                                                                                                                                                                                                                          |
| 34 |                                  |     |                                                                                                                                                                                                                                                                                                                                                          |
| 35 | Sequence generation              | 16a | Method of generating the allocation sequence (eg, computer-generated random numbers), and list of any factors for stratification. To reduce predictability of a random sequence, details of any planned restriction (eg, blocking) should be provided in a separate document that is unavailable to those who enrol participants or assign interventions |
| 36 |                                  |     | <b>Page 10 (Randomisation and Blinding).</b>                                                                                                                                                                                                                                                                                                             |
| 37 |                                  |     |                                                                                                                                                                                                                                                                                                                                                          |
| 38 |                                  |     |                                                                                                                                                                                                                                                                                                                                                          |
| 39 |                                  |     |                                                                                                                                                                                                                                                                                                                                                          |
| 40 |                                  |     |                                                                                                                                                                                                                                                                                                                                                          |
| 41 |                                  |     |                                                                                                                                                                                                                                                                                                                                                          |
| 42 |                                  |     |                                                                                                                                                                                                                                                                                                                                                          |
| 43 |                                  |     |                                                                                                                                                                                                                                                                                                                                                          |
| 44 |                                  |     |                                                                                                                                                                                                                                                                                                                                                          |
| 45 | Allocation concealment mechanism | 16b | Mechanism of implementing the allocation sequence (eg, central telephone; sequentially numbered, opaque, sealed envelopes), describing any steps to conceal the sequence until interventions are assigned                                                                                                                                                |
| 46 |                                  |     | <b>Page 10 (Randomisation and Blinding).</b>                                                                                                                                                                                                                                                                                                             |
| 47 |                                  |     |                                                                                                                                                                                                                                                                                                                                                          |
| 48 |                                  |     |                                                                                                                                                                                                                                                                                                                                                          |
| 49 |                                  |     |                                                                                                                                                                                                                                                                                                                                                          |
| 50 |                                  |     |                                                                                                                                                                                                                                                                                                                                                          |
| 51 |                                  |     |                                                                                                                                                                                                                                                                                                                                                          |
| 52 | Implementation                   | 16c | Who will generate the allocation sequence, who will enrol participants, and who will assign participants to interventions                                                                                                                                                                                                                                |
| 53 |                                  |     | <b>Page 10 (Randomisation and Blinding).</b>                                                                                                                                                                                                                                                                                                             |
| 54 |                                  |     |                                                                                                                                                                                                                                                                                                                                                          |
| 55 |                                  |     |                                                                                                                                                                                                                                                                                                                                                          |
| 56 |                                  |     |                                                                                                                                                                                                                                                                                                                                                          |
| 57 |                                  |     |                                                                                                                                                                                                                                                                                                                                                          |
| 58 |                                  |     |                                                                                                                                                                                                                                                                                                                                                          |
| 59 |                                  |     |                                                                                                                                                                                                                                                                                                                                                          |
| 60 |                                  |     |                                                                                                                                                                                                                                                                                                                                                          |

|    |                                                           |     |                                                                          |
|----|-----------------------------------------------------------|-----|--------------------------------------------------------------------------|
| 1  |                                                           |     |                                                                          |
| 2  | Blinding                                                  | 17a | Who will be blinded after assignment to interventions (eg, trial         |
| 3  | (masking)                                                 |     | participants, care providers, outcome assessors, data analysts), and     |
| 4  |                                                           |     | how.                                                                     |
| 5  |                                                           |     | <b>Page 10 (Randomisation and Blinding).</b>                             |
| 6  |                                                           |     |                                                                          |
| 7  |                                                           | 17b | If blinded, circumstances under which unblinding is permissible, and     |
| 8  |                                                           |     | procedure for revealing a participant's allocated intervention during    |
| 9  |                                                           |     | the trial                                                                |
| 10 |                                                           |     | <b>N/A</b>                                                               |
| 11 |                                                           |     |                                                                          |
| 12 |                                                           |     |                                                                          |
| 13 | <b>Methods: Data collection, management, and analysis</b> |     |                                                                          |
| 14 |                                                           |     |                                                                          |
| 15 | Data collection                                           | 18a | Plans for assessment and collection of outcome, baseline, and other      |
| 16 | methods                                                   |     | trial data, including any related processes to promote data quality (eg, |
| 17 |                                                           |     | duplicate measurements, training of assessors) and a description of      |
| 18 |                                                           |     | study instruments (eg, questionnaires, laboratory tests) along with      |
| 19 |                                                           |     | their reliability and validity, if known. Reference to where data        |
| 20 |                                                           |     | collection forms can be found, if not in the protocol                    |
| 21 |                                                           |     | <b>Page 9 (Recruitment); Page 10 (Smartphone-Delivered Wound</b>         |
| 22 |                                                           |     | <b>Assessment Tool); Table 1</b>                                         |
| 23 |                                                           |     |                                                                          |
| 24 |                                                           | 18b | Plans to promote participant retention and complete follow-up,           |
| 25 |                                                           |     | including list of any outcome data to be collected for participants who  |
| 26 |                                                           |     | discontinue or deviate from intervention protocols                       |
| 27 |                                                           |     | <b>Page 10 (Smartphone-Delivered Wound Assessment Tool); Page</b>        |
| 28 |                                                           |     | <b>13 (Data analysis plan)</b>                                           |
| 29 |                                                           |     |                                                                          |
| 30 | Data                                                      | 19  | Plans for data entry, coding, security, and storage, including any       |
| 31 | management                                                |     | related processes to promote data quality (eg, double data entry;        |
| 32 |                                                           |     | range checks for data values). Reference to where details of data        |
| 33 |                                                           |     | management procedures can be found, if not in the protocol.              |
| 34 |                                                           |     | <b>Page 16 (Data Protection and Management).</b>                         |
| 35 |                                                           |     |                                                                          |
| 36 | Statistical                                               | 20a | Statistical methods for analysing primary and secondary outcomes.        |
| 37 | methods                                                   |     | Reference to where other details of the statistical analysis plan can be |
| 38 |                                                           |     | found, if not in the protocol.                                           |
| 39 |                                                           |     | <b>Page 13 (Data Analysis Plan / Outcome Measures)</b>                   |
| 40 |                                                           |     |                                                                          |
| 41 |                                                           | 20b | Methods for any additional analyses (eg, subgroup and adjusted           |
| 42 |                                                           |     | analyses)                                                                |
| 43 |                                                           |     | <b>Page 13 (Data Analysis Plan / Outcome Measures)</b>                   |
| 44 |                                                           |     |                                                                          |
| 45 |                                                           | 20c | Definition of analysis population relating to protocol non-adherence     |
| 46 |                                                           |     | (eg, as randomised analysis), and any statistical methods to handle      |
| 47 |                                                           |     | missing data (eg, multiple imputation)                                   |
| 48 |                                                           |     | <b>Page 13 (Data Analysis Plan / Outcome Measures)</b>                   |
| 49 |                                                           |     |                                                                          |
| 50 |                                                           |     |                                                                          |
| 51 |                                                           |     |                                                                          |
| 52 |                                                           |     |                                                                          |
| 53 |                                                           |     |                                                                          |
| 54 |                                                           |     |                                                                          |
| 55 |                                                           |     |                                                                          |
| 56 |                                                           |     |                                                                          |
| 57 |                                                           |     |                                                                          |
| 58 |                                                           |     |                                                                          |
| 59 |                                                           |     |                                                                          |
| 60 |                                                           |     |                                                                          |

## Methods: Monitoring

|                                 |     |                                                                                                                                                                                                                                                                                                                                                                  |
|---------------------------------|-----|------------------------------------------------------------------------------------------------------------------------------------------------------------------------------------------------------------------------------------------------------------------------------------------------------------------------------------------------------------------|
| Data monitoring                 | 21a | Composition of data monitoring committee (DMC); summary of its role and reporting structure; statement of whether it is independent from the sponsor and competing interests; and reference to where further details about its charter can be found, if not in the protocol. Alternatively, an explanation of why a DMC is not needed<br><b>Page 16 (safety)</b> |
|                                 | 21b | Description of any interim analyses and stopping guidelines, including who will have access to these interim results and make the final decision to terminate the trial<br><b>N/A</b>                                                                                                                                                                            |
| Harms                           | 22  | Plans for collecting, assessing, reporting, and managing solicited and spontaneously reported adverse events and other unintended effects of trial interventions or trial conduct<br><b>Page 16 (safety)</b>                                                                                                                                                     |
| Auditing                        | 23  | Frequency and procedures for auditing trial conduct, if any, and whether the process will be independent from investigators and the sponsor<br><b>N/A</b>                                                                                                                                                                                                        |
| <b>Ethics and dissemination</b> |     |                                                                                                                                                                                                                                                                                                                                                                  |
| Research ethics approval        | 24  | Plans for seeking research ethics committee/institutional review board (REC/IRB) approval<br><b>Page 17 (Ethical Approval and Dissemination Plan)</b>                                                                                                                                                                                                            |
| Protocol amendments             | 25  | Plans for communicating important protocol modifications (eg, changes to eligibility criteria, outcomes, analyses) to relevant parties (eg, investigators, REC/IRBs, trial participants, trial registries, journals, regulators)<br><b>Page 17 (Ethical Approval and Dissemination Plan)</b>                                                                     |
| Consent or assent               | 26a | Who will obtain informed consent or assent from potential trial participants or authorised surrogates, and how (see Item 32)<br><b>Page 17 (Ethical Approval and Dissemination Plan)</b>                                                                                                                                                                         |
|                                 | 26b | Additional consent provisions for collection and use of participant data and biological specimens in ancillary studies, if applicable<br><b>N/A</b>                                                                                                                                                                                                              |
| Confidentiality                 | 27  | How personal information about potential and enrolled participants will be collected, shared, and maintained in order to protect confidentiality before, during, and after the trial<br><b>Page 16 (Data Protection and Management)</b>                                                                                                                          |

|    |                   |     |                                                                              |
|----|-------------------|-----|------------------------------------------------------------------------------|
| 1  |                   |     |                                                                              |
| 2  | Declaration of    | 28  | Financial and other competing interests for principal investigators for      |
| 3  | interests         |     | the overall trial and each study site                                        |
| 4  |                   |     | <b>Page 18</b>                                                               |
| 5  |                   |     |                                                                              |
| 6  | Access to data    | 29  | Statement of who will have access to the final trial dataset, and            |
| 7  |                   |     | disclosure of contractual agreements that limit such access for              |
| 8  |                   |     | investigators                                                                |
| 9  |                   |     | <b>Page 16 (Data Protection and Management)</b>                              |
| 10 |                   |     |                                                                              |
| 11 | Ancillary and     | 30  | Provisions, if any, for ancillary and post-trial care, and for               |
| 12 | post-trial care   |     | compensation to those who suffer harm from trial participation               |
| 13 |                   |     | <b>N/A</b>                                                                   |
| 14 |                   |     |                                                                              |
| 15 |                   |     |                                                                              |
| 16 | Dissemination     | 31a | Plans for investigators and sponsor to communicate trial results to          |
| 17 | policy            |     | participants, healthcare professionals, the public, and other relevant       |
| 18 |                   |     | groups (eg, via publication, reporting in results databases, or other        |
| 19 |                   |     | data sharing arrangements), including any publication restrictions           |
| 20 |                   |     | <b>Page 17 (Ethical Approval and Dissemination Plan)</b>                     |
| 21 |                   |     |                                                                              |
| 22 |                   |     |                                                                              |
| 23 |                   | 31b | Authorship eligibility guidelines and any intended use of professional       |
| 24 |                   |     | writers                                                                      |
| 25 |                   |     | <b>Page 17 (Ethical Approval and Dissemination Plan)</b>                     |
| 26 |                   |     |                                                                              |
| 27 |                   |     |                                                                              |
| 28 |                   | 31c | Plans, if any, for granting public access to the full protocol, participant- |
| 29 |                   |     | level dataset, and statistical code                                          |
| 30 |                   |     | <b>N/A</b>                                                                   |
| 31 |                   |     |                                                                              |
| 32 |                   |     |                                                                              |
| 33 | <b>Appendices</b> |     |                                                                              |
| 34 |                   |     |                                                                              |
| 35 | Informed consent  | 32  | Model consent form and other related documentation given to                  |
| 36 | materials         |     | participants and authorised surrogates                                       |
| 37 |                   |     | <b>Supplementary File</b>                                                    |
| 38 |                   |     |                                                                              |
| 39 | Biological        | 33  | Plans for collection, laboratory evaluation, and storage of biological       |
| 40 | specimens         |     | specimens for genetic or molecular analysis in the current trial and for     |
| 41 |                   |     | future use in ancillary studies, if applicable                               |
| 42 |                   |     | <b>N/A</b>                                                                   |
| 43 |                   |     |                                                                              |

---

\*It is strongly recommended that this checklist be read in conjunction with the SPIRIT 2013 Explanation & Elaboration for important clarification on the items. Amendments to the protocol should be tracked and dated. The SPIRIT checklist is copyrighted by the SPIRIT Group under the Creative Commons "[Attribution-NonCommercial-NoDerivs 3.0 Unported](https://creativecommons.org/licenses/by-nc-nd/3.0/)" license.

# BMJ Open

**Can a smartphone-delivered tool facilitate the assessment of surgical site infection and result in earlier treatment? Tracking Wound Infection with Smartphone Technology (TWIST): protocol for a randomized-controlled trial in emergency surgery patients.**

|                                 |                                                                                                                                                                                                                                                                                                                                                                                                                                                                                                                                                                                                                                                                                                                                                                                                                                                                                                                                                                                                                                                                                                                                                                                                                                                                                                                                                                                                                                                                                                                                                                                                                                                                                |
|---------------------------------|--------------------------------------------------------------------------------------------------------------------------------------------------------------------------------------------------------------------------------------------------------------------------------------------------------------------------------------------------------------------------------------------------------------------------------------------------------------------------------------------------------------------------------------------------------------------------------------------------------------------------------------------------------------------------------------------------------------------------------------------------------------------------------------------------------------------------------------------------------------------------------------------------------------------------------------------------------------------------------------------------------------------------------------------------------------------------------------------------------------------------------------------------------------------------------------------------------------------------------------------------------------------------------------------------------------------------------------------------------------------------------------------------------------------------------------------------------------------------------------------------------------------------------------------------------------------------------------------------------------------------------------------------------------------------------|
| Journal:                        | <i>BMJ Open</i>                                                                                                                                                                                                                                                                                                                                                                                                                                                                                                                                                                                                                                                                                                                                                                                                                                                                                                                                                                                                                                                                                                                                                                                                                                                                                                                                                                                                                                                                                                                                                                                                                                                                |
| Manuscript ID                   | bmjopen-2019-029620.R1                                                                                                                                                                                                                                                                                                                                                                                                                                                                                                                                                                                                                                                                                                                                                                                                                                                                                                                                                                                                                                                                                                                                                                                                                                                                                                                                                                                                                                                                                                                                                                                                                                                         |
| Article Type:                   | Protocol                                                                                                                                                                                                                                                                                                                                                                                                                                                                                                                                                                                                                                                                                                                                                                                                                                                                                                                                                                                                                                                                                                                                                                                                                                                                                                                                                                                                                                                                                                                                                                                                                                                                       |
| Date Submitted by the Author:   | 19-Jul-2019                                                                                                                                                                                                                                                                                                                                                                                                                                                                                                                                                                                                                                                                                                                                                                                                                                                                                                                                                                                                                                                                                                                                                                                                                                                                                                                                                                                                                                                                                                                                                                                                                                                                    |
| Complete List of Authors:       | McLean, Kenneth; University of Edinburgh, 51 Little France Crescent, Edinburgh, EH16 4SA, United Kingdom, Department of Clinical Surgery, Mountain, Katie; University of Edinburgh, 51 Little France Crescent, Edinburgh, EH16 4SA, United Kingdom, Department of Clinical Surgery, Shaw, Catherine; University of Edinburgh, 51 Little France Crescent, Edinburgh, EH16 4SA, United Kingdom, Department of Clinical Surgery, Drake, Thomas ; University of Edinburgh, 51 Little France Crescent, Edinburgh, EH16 4SA, United Kingdom, Department of Clinical Surgery, Ots, Riinu; University of Edinburgh, 51 Little France Crescent, Edinburgh, EH16 4SA, United Kingdom, Department of Clinical Surgery, Knight, Stephen; University of Edinburgh, 51 Little France Crescent, Edinburgh, EH16 4SA, United Kingdom, Department of Clinical Surgery, Fairfield, Cameron; University of Edinburgh, 51 Little France Crescent, Edinburgh, EH16 4SA, United Kingdom, Department of Clinical Surgery, Sgrò, Alessandro; University of Edinburgh, 51 Little France Crescent, Edinburgh, EH16 4SA, United Kingdom, Department of Clinical Surgery, Skipworth, Richard; University of Edinburgh, 51 Little France Crescent, Edinburgh, EH16 4SA, United Kingdom, Department of Clinical Surgery, Wigmore, Stephen; University of Edinburgh, 51 Little France Crescent, Edinburgh, EH16 4SA, United Kingdom, Department of Clinical Surgery, Potter, Mark; Western General Hospital, Crewe Rd S, Edinburgh, EH4 2XU, UK, Colorectal Unit<br>Harrison, Ewen ; University of Edinburgh, 51 Little France Crescent, Edinburgh, EH16 4SA, United Kingdom, Department of Clinical Surgery, |
| <b>Primary Subject Heading</b>: | Surgery                                                                                                                                                                                                                                                                                                                                                                                                                                                                                                                                                                                                                                                                                                                                                                                                                                                                                                                                                                                                                                                                                                                                                                                                                                                                                                                                                                                                                                                                                                                                                                                                                                                                        |
| Secondary Subject Heading:      | Health informatics, Patient-centred medicine                                                                                                                                                                                                                                                                                                                                                                                                                                                                                                                                                                                                                                                                                                                                                                                                                                                                                                                                                                                                                                                                                                                                                                                                                                                                                                                                                                                                                                                                                                                                                                                                                                   |
| Keywords:                       | Surgical Site Infection, SURGERY, smartphone technology                                                                                                                                                                                                                                                                                                                                                                                                                                                                                                                                                                                                                                                                                                                                                                                                                                                                                                                                                                                                                                                                                                                                                                                                                                                                                                                                                                                                                                                                                                                                                                                                                        |
|                                 |                                                                                                                                                                                                                                                                                                                                                                                                                                                                                                                                                                                                                                                                                                                                                                                                                                                                                                                                                                                                                                                                                                                                                                                                                                                                                                                                                                                                                                                                                                                                                                                                                                                                                |



1  
2  
3  
4  
5  
6  
7  
8  
9  
10  
11  
12  
13  
14  
15  
16  
17  
18  
19  
20  
21  
22  
23  
24  
25  
26  
27  
28  
29  
30  
31  
32  
33  
34  
35  
36  
37  
38  
39  
40  
41  
42  
43  
44  
45  
46  
47  
48  
49  
50  
51  
52  
53  
54  
55  
56  
57  
58  
59  
60

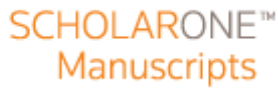

1  
2  
3 **Can a smartphone-delivered tool facilitate the assessment of surgical**  
4 **site infection and result in earlier treatment? Tracking Wound Infection**  
5 **with Smartphone Technology (TWIST): protocol for a randomized-**  
6 **controlled trial in emergency surgery patients.**  
7  
8  
9  
10  
11  
12  
13  
14

15 **Trial Registration:** *ClinicalTrials.gov*. Reference No: NCT02704897  
16

17  
18 **Protocol version:** 2.0.  
19

20  
21 **Funding:** This research received no specific grant from any funding agency in the public,  
22 commercial or not-for-profit sectors.  
23  
24

25  
26 **Roles and responsibilities:**

27 McLean KA<sup>1</sup>, Mountain KE <sup>1</sup>, Shaw CA<sup>1</sup>, Drake TM<sup>1</sup>, Ots R<sup>1</sup>, Knight SR<sup>1</sup>, Fairfield CJ<sup>1</sup>, Sgrò  
28 A<sup>1</sup>, Skipworth R<sup>1</sup>, Wigmore SJ<sup>1</sup>, Potter M<sup>2</sup>, Harrison E<sup>1</sup>  
29

- 30  
31 1. Department of Clinical Surgery, Royal Infirmary of Edinburgh, University of  
32 Edinburgh, Edinburgh, EH16 4SA, UK  
33  
34 2. Colorectal Unit, Western General Hospital, Crewe Rd S, Edinburgh, EH4 2XU, UK  
35  
36  
37

38  
39 **Address for Correspondence**

40 Dr Kenneth A McLean  
41 Department of Clinical Surgery  
42 Royal Infirmary Edinburgh  
43 51 Little France Crescent  
44 Edinburgh  
45 EH16 4SA  
46 United Kingdom  
47

48  
49 Telephone: +44(0) 131 242 3614  
50 Email: v1kmcle6@ed.ac.uk  
51

52  
53 **Keywords:** *Surgical Site Infection, smartphone technology, surgery*  
54

55  
56 **MeSH Terms:** *Surgical Wound Infection\*, Diagnosis, Smartphone, General Surgery*  
57  
58  
59  
60

## **Abstract**

## **Introduction**

National data suggest that surgical site infection (SSI) complicates 2-10% of general surgery cases, although the patient-reported incidence is much higher. SSIs cause significant patient morbidity and represent a significant burden on acute healthcare services, in a cohort predominantly suitable for outpatient management. Over three-quarters of UK adults now own smartphones, which could be harnessed to improve access to care. We aim to investigate if a smartphone-delivered wound assessment tool results in earlier treatment.

## **Methods and Analysis**

This is a randomised-controlled trial aiming to recruit 500 patients across NHS hospitals. All emergency abdominal surgery patients over the age of 16 who own smartphones will be considered eligible, with the exclusion of those with significant visual impairment.

Participants will be randomised in a 1:1 ratio between standard post-operative care and the intervention – use of the smartphone tool in addition to standard post-operative care. The main outcome measure will be time-to-diagnosis of SSI with secondary outcome measures considering use of Emergency Department (ED) and General Practitioner (GP) services and patient experience. Follow-up will be conducted by clinicians blinded to group allocation. Analysis of time-to-diagnosis will be by comparison of means using an independent 2 sample t-test.

## **Ethics and Dissemination**

This is the first randomised controlled trial on the use of a smartphone-delivered wound assessment tool to facilitate the assessment of surgical site infection and the impact on time-to-diagnosis. The intervention is being used in addition to standard post-operative care. The study design and protocol were reviewed and approved by Southeast Scotland

1 Research and Ethics Committee (REC Ref: 16/SS/0072 24/05/2016). Study findings will be  
2 presented at academic conferences, published in peer-reviewed journals, and are expected  
3 in 2020. A written lay summary will be available to study participants on request.  
4  
5  
6  
7  
8

## 9 **Trial Registration**

10 *ClinicalTrials.gov*. Reference No: NCT02704897  
11  
12  
13  
14  
15  
16  
17  
18  
19  
20  
21  
22  
23  
24  
25  
26  
27  
28  
29  
30  
31  
32  
33  
34  
35  
36  
37  
38  
39  
40  
41  
42  
43  
44  
45  
46  
47  
48  
49  
50  
51  
52  
53  
54  
55  
56  
57  
58  
59  
60

## Strengths and Limitations of this Study:

- This is the first randomised controlled trial on the use of a smartphone-delivered wound assessment tool to facilitate the assessment of surgical site infection and the impact on time-to-diagnosis.
- There are broad eligibility criteria, and so it is expected the results will be generalisable to a wide population of patients undergoing abdominal surgery.
- Due to the nature of the intervention, only clinicians undertaking follow-up can be blinded to randomisation status.
- All patients will receive 30-day telephone or face-to-face follow-up to determine the occurrence of surgical site infections, however the gold-standard for diagnosis remains direct clinical assessment.
- Data on patient experience and acceptability of smartphone-delivered follow-up will be collected concurrently to guide future implementation of future telehealth interventions.

review only

## Introduction

Surgical site infection (SSI) complicates 2-10% of general surgical cases, with the highest rates of infection seen after colorectal surgery<sup>1</sup>. Infection and re-admission rates have not significantly changed in the last 10 years. The most common causative group is *Enterobacteriaceae* (25% of cases), with *Staph. Aureus* (10%) and MRSA (3%) accounting for a small proportion of overall cases<sup>1</sup>. National surveillance data from Scotland indicate that peak incidence of infection is between day 6-12 post-operatively<sup>2</sup>.

A recent study indicated that national reports may underestimate the true incidence of SSI, and suggested that patient reported SSI is a more sensitive measure<sup>3</sup>. Unpublished data from our own hospital indicates that up to 25% of patients report post-operative wound infections; approximately half of these require assessment by the surgical team, but less than 1% require admission. Many of these patients had already consulted their General Practitioner (GP) or attended the Emergency Department (ED). In addition, many patients have concerns about their wounds (in the absence of infection) and may experience delays in accessing appropriate medical assessment. Thus, SSI represents a significant burden on healthcare services, in a patient group who are predominantly appropriate for outpatient management.

There is currently an increased research focus on digital health: the use of communications technology to enhance healthcare, public health and delivery of health education<sup>4</sup>. There are several advantages to this approach, in particular the potential to improve access to care, and help streamline usage of emergency services. Indeed, there is evidence that these technologies have been used to improve outcome<sup>5</sup>, as well as to reduce specialist workload<sup>6</sup> and ED attendances<sup>7</sup>. In addition, the increasing use of healthcare technology is

1 likely to help improve automatic data collection and recording, which may be used to  
2  
3 identify areas for future research and drive quality improvement<sup>4</sup>.  
4  
5  
6  
7

8 Over three-quarters (78%) of UK adults now own smartphones<sup>8</sup>, with at least a third using  
9 a smartphone as their primary device to access the internet<sup>4</sup>. Therefore, there is vast  
10 potential for the use of smartphones in digital health, with a growing literature on the use in  
11 the context of postoperative community follow-up<sup>9 10</sup>. Given the frequency with which  
12 patients report post-operative wound complications and the high incidence of SSI, this has  
13 become a research focus in telemedicine for postoperative care<sup>11 12</sup>. We aim to investigate  
14 if an online wound assessment tool can be used to help diagnose SSI and improve patient  
15 access to care and clinical assessment. In addition, we aim to investigate if this results in  
16 earlier intervention to treat SSI and a decreased attendance at ED and GPs. The  
17 widespread use of smartphones, the integrated nature of their technology, and their  
18 portability means smartphones represent the best platform to deliver this tool, with the aim  
19 of facilitating rapid access to clinical care.  
20  
21  
22  
23  
24  
25  
26  
27  
28  
29  
30  
31  
32  
33  
34  
35  
36

### 37 **Objectives**

38 This randomised-controlled trial will investigate whether a smartphone-delivered wound  
39 assessment tool can be used in the diagnosis of SSI and result in earlier treatment. It will  
40 also assess for a reduction in ED and GP attendances as a result of using the intervention.  
41  
42  
43  
44  
45  
46  
47 Data on patient experience will be used to evaluate perceived utility of the tool.  
48  
49  
50  
51  
52  
53  
54  
55  
56  
57  
58  
59  
60

## Methods and Analysis

### Overview

This is a superiority randomised-controlled trial, using a parallel two-arm design (Figure 1).

Once consent is obtained, participants will be randomised in a 1:1 ratio to either the intervention arm (receiving standard post-operative care plus access to the smartphone-delivered wound assessment tool), or the control arm (standard post-operative care).

Patients will be recruited from the emergency surgery inpatient service across NHS Lothian.

The trial period will be 30 days. An internal pilot study in the first 80 patients recruited will be conducted to ensure the trial design is practical and deliverable. Following assessment of pilot data, there will be an opportunity to adapt the trial design in response to the pilot study findings. Participants will be followed-up by a researcher blinded to the intervention status.

The primary outcome measure will be the number of days from surgery to diagnosis of SSI (time-to-diagnosis), with ED and GP service use as a secondary outcome measure.

Additional data regarding patient experience will also be collected from patients in both arms of the trial via a smartphone-delivered questionnaire at 30 days.

### Research Setting

This research is being carried out in a large health board, serving a mixed urban and rural population of over 800,000. The emergency surgery service admits 300 patients per week between participating sites and performs 2500 procedures annually.

### Participants

Emergency surgery inpatients who are adults (over age 16) and have undergone abdominal surgery (on the same admission as diagnosis) will be screened for eligibility. Potentially eligible patients will be screened and documented as (a) eligible and included, (b) eligible and missed, (c) eligible and declined (iv) ineligible (visual impairment) (v) ineligible (no smartphone). Written consent will be obtained by the research team in line with Good



1  
2 Clinical Practice Guidance. Participation is voluntary and a patient's decision regarding  
3 participation will not affect any aspect of their care in the case of refusal. Participants will  
4 have the right to withdraw from the study at any point.  
5  
6  
7  
8  
9  
10

### 11 ***Inclusion Criteria***

12 Patients admitted to the emergency surgery inpatient service who meet the following criteria  
13 will be included in the study:  
14  
15

- 16 • Emergency surgery inpatients who have undergone abdominal surgery;
  - 17 • Owners of a smartphone, with access to internet;
  - 18 • Adults over the age over 16;
  - 19 • Able to give informed consent.
- 20  
21  
22  
23  
24  
25  
26  
27  
28  
29  
30

### 31 ***Exclusion Criteria***

32 Any patients with significant visual impairment preventing use of the online questionnaire  
33 will be excluded from the study (defined by self-reporting of the patient)  
34  
35  
36  
37  
38  
39

### 40 ***Study Procedures***

#### 41 **Recruitment**

42 The clinical team will inform potentially eligible patients about the on-going trial, and offer  
43 them further information (written and verbal from the research team). Eligible patients will  
44 be recruited postoperatively as inpatients, with formal written consent taken by a member of  
45 the research team. Baseline information gathered will include: reason for admission, index  
46 procedure and date, significant co-morbidities – including history of diabetes or  
47 immunosuppression, as well as age and BMI. Participant contact details (mobile telephone  
48 number) will be entered into a secure, online data collection tool (Research Electronic Data  
49 Capture (REDCap) database) <sup>13</sup>.  
50  
51  
52  
53  
54  
55  
56  
57  
58  
59  
60

## Randomisation and Blinding

Participants will be assigned in a 1:1 ratio to the intervention or control arms and provided with the appropriate information packs prior to discharge. Simple randomization will be carried out using REDCap<sup>13</sup>, utilising a computer-generated random number sequence. The emergency surgery nurses (who will provide care to patients as required during the trial), and those taking consent (which may include medical students and qualified clinicians) will not be blinded. The clinicians undertaking follow-up will be blinded to status. A trial entry will be made in the clinical notes, including contact details for the trial team should a member of the clinical team require more information or wish to discover their trial status.

## Intervention

### Smartphone-Delivered Wound Assessment Tool

A wound-based instrument to detect potential wound infection was developed. Our smartphone-delivered wound assessment model was based on the Centre for Disease Control and Prevention (CDC) classification criteria, and the ASEPSIS model (Additional treatment, Serous discharge, Erythema, Purulent exudate, and Separation of the deep tissues, the Isolation of bacteria, and the duration of Inpatient Stay).<sup>14 15</sup> It detects symptoms of SSI and symptoms of systemic illness as a result of this, whilst being quick and simple to use (Table 1).

Participants will have access to the smartphone-delivered wound assessment tool on discharge via a link sent by short-messaging system (SMS) to their smartphones. If at any time they have concerns about their wound, they can access the tool, and will be advised based on their responses. When a patient response is submitted, the research team will be automatically notified, and prompted to reply (Figure 2).

1 In addition, a link to the smartphone-delivered wound assessment tool will be sent on days  
2  
3  
4 3, 7, and 15 post-operatively. These time-points have been selected to include peak  
5  
6 incidence of infection and cover the time-course of wound healing. This will ensure the  
7  
8 collection of negative data in those without symptoms and will therefore assist in  
9  
10 determining the specificity of the tool. If participants do not respond they will be sent a  
11  
12 single reminder at these time-points.  
13  
14  
15  
16  
17  
18

### 19 **Wound Photographs**

20 Participants will be asked to upload at least one photograph of their wound each time they  
21  
22 use the smartphone-delivered wound assessment tool. These will be reviewed by a clinical  
23  
24 researcher and assigned into one of 3 categories: no concerns, medium-risk, high-risk.  
25  
26 Further machine learning-based assessment of wound photographs will be investigated.  
27  
28  
29  
30  
31  
32

### 33 **Responses**

34 An experienced clinician (surgical registrar or consultant) will review all participant  
35  
36 responses and photographs in real-time. Based on the response and the wound  
37  
38 photographs, they will contact the patient by SMS with advice regarding the need for further  
39  
40 assessment. The clinician will classify participants into 3 groups: no concern, medium-risk,  
41  
42 high-risk. These three groups were agreed collectively by the researchers in collaboration  
43  
44 with the emergency surgical team. Three potential outcomes were identified: (i) the patient  
45  
46 does not require further assessment (no concern), (ii) the patient requires further  
47  
48 assessment, but the symptoms identified suggest a mild infection (medium-risk), (iii) the  
49  
50 symptoms suggest a potentially severe infection requiring urgent assessment (high-risk).  
51  
52 The wound photographs will also be reviewed by the experienced clinician where available  
53  
54 and classified into the same 3 groups. This may be used by the researcher to refine their  
55  
56 response to the tool, if they consider this necessary.  
57  
58  
59  
60

## Algorithm

An algorithm has been designed to classify participant responses into the same 3 categories listed above (Table 1). This will be run on all participant responses (but will not impact on care), and will be compared with clinician rating, as a secondary sub-study. The correlation between clinician response, algorithm response and photo response will be used to determine if the algorithm can be used to assess for SSI independent of the responsible doctor.

## Action from Response

Participants whose responses raise no concerns will be advised of this. Participants who report symptoms consistent with wound infection will be directed for further assessment. Those in the medium-risk group will be directed to community care whilst those in the high-risk group will be advised to return for assessment at the centre where they had their procedure. This advice aligns to the degree of concern identified above.

## Wound Reviews

For those in the intervention group who are identified as high-risk, the emergency surgery nurses will collect a wound swab from the patient to test for causative organisms (and aid in confirming infection). If a wound infection is diagnosed clinically, the patient will be started with antibiotics in line with local guidelines. This will be logged in the patient's trial record. If any patients in the control group attend the emergency surgery service for a review the same procedures will apply.

GPs will be informed about their patient's participation in the trial. We will request that if a participant enrolled in the trial visits their GP a wound swab is taken, and that they are

1 treated in line with the GP's normal practice. This will also apply to those in the medium-risk  
2  
3  
4 group who will be directed to their GP.  
5  
6  
7

8 All participants will be given a log to take to any wound reviews, and wound swabs may be  
9  
10 taken of wound discharge or the wound bed as appropriate. If an infection is diagnosed the  
11  
12 date treatment is commenced will be noted, alongside any intervention performed. This will  
13  
14 then be returned to the trial team, and used in follow-up.  
15  
16  
17

### 21 **30 Day Follow-up**

22 Both arms will receive a follow-up face-to-face or telephone consultation 30 days post-  
23  
24 operatively (alternatively, written follow-up is also available for those with significant hearing  
25  
26 impairment). This consultation will follow a standardized format and will be conducted with  
27  
28 an independent clinical researcher blinded to the intervention status. The clinical researcher  
29  
30 will gather data on post-operative course, any symptoms related to the wound, and any  
31  
32 treatment offered. They will also have access to electronic patient record (including all  
33  
34 microbiology results from swabs taken in the community or hospital) and any wound logs  
35  
36 returned. On the basis of these three sources of information, two independent, blinded  
37  
38 clinical researchers will determine if an infection has been present (trained using the CDC  
39  
40 Criteria to diagnose infection).<sup>14</sup> Data on patient experience and service usage – ED and  
41  
42 GP attendances, as well as contact with emergency surgery nurses – will also be collected  
43  
44 via a separate questionnaire delivered alongside the 30 day follow-up (Table 2).  
45  
46  
47  
48  
49  
50

### 51 **Data Analysis Plan**

52 All analysis will be carried out on an intention-to-treat basis. We do not anticipate missing  
53  
54 data in patient demographics. However, any missing data values will be handled using  
55  
56 multiple imputation. The volume of missing outcome data will be recorded for the control  
57  
58  
59  
60

1 and intervention arms, and any differences in drop-out rate noted. Thereafter patients with  
2 missing outcome data will be excluded from analysis.  
3  
4  
5  
6  
7  
8

## 9 **Outcome Measures**

10 This is a superiority RCT, and the primary outcome will be mean time from operation to  
11 diagnosis (time-to-diagnosis) of SSI. This outcome has been chosen (rather than time from  
12 symptom onset), as it can be more accurately recorded and is a measure of improved  
13 access to care. We assume an equal incidence of SSI in both groups and will ensure this  
14 using odds ratios. Time-to-diagnosis will also be compared using Cox proportional hazard  
15 regression analysis, a *P* value of <0.05 will be considered statistically significant.  
16  
17  
18  
19  
20  
21  
22  
23  
24  
25  
26  
27

28 For the intervention, we will calculate the sensitivity and specificity of the researcher  
29 response, the algorithm response, and photograph response in the diagnosis of SSI. We  
30 will compare the correlation of the algorithm, which is based on questionnaire responses,  
31 with clinician advice and eventual diagnosis. Correlation analysis will be performed using  
32 Kendall tau rank test. This will assess the accuracy of the algorithm in stratifying risk, as  
33 compared to a clinician, and will indicate what additional benefit may be gained from  
34 photographic analysis.  
35  
36  
37  
38  
39  
40  
41  
42  
43  
44  
45  
46

47 The secondary outcome measure will be use of services: GP and ED attendances, as well  
48 as contact with emergency surgery nurses. This data will be gathered at 30 days.  
49

50 Differences in number of attendees to GP and ED will be compared using a  $\chi^2$  test.  
51

52 Differences in the number of attendances will be assessed using the Mann-Whitney U-test.  
53

54 Data on patient experience will also be gathered via a follow-up questionnaire and analysed  
55 separately (Table 2). This will help determine if an online questionnaire delivered via a  
56  
57  
58  
59  
60

1  
2 smartphone has a positive impact on patient experience of care, and if it helped facilitate  
3  
4 their access to care.  
5  
6  
7  
8  
9

## 10 **Sample Size and Power Analysis**

11 Our primary outcome measure is time-to-diagnosis and we aim to detect a one-day  
12  
13 difference with a power of 90% (alpha 0.05). Assuming a standard deviation of 1 day in  
14  
15 time-to-diagnosis, 22 wound infections per group will be required. Estimating a 10% rate of  
16  
17 wound infection (in line with National Data)<sup>2</sup> and a drop-out rate of 10%, a sample size of  
18  
19 490 will be required (recruitment target 500 patients). Analyses will be intention-to-treat.  
20  
21  
22  
23  
24

25 Assuming that 50 operations are performed per week and two thirds of these patients are  
26  
27 likely to own smartphones, we estimate there will be 30 potentially eligible patients per  
28  
29 week. Aiming for recruitment of 25% of eligible patients, we estimate a continuous  
30  
31 recruitment time of 16 months. This rate of recruitment will also enable the researcher to  
32  
33 respond to all patient concerns in a timely manner.  
34  
35  
36  
37  
38  
39

## 40 **Ethics and dissemination:**

### 41 **Safety**

42 All participants will receive the normal standard of care. The smartphone-based intervention  
43  
44 is in addition to the normal standard of care. If at any point participants have any concerns.  
45  
46 they will be advised to contact the emergency surgery nurses regarding their care (in line  
47  
48 with normal standard of care). Out-of-hours they will be advised to contact NHS out-of-  
49  
50 hours services. Participants will be advised to contact the emergency surgery nurses if they  
51  
52 have any concerns whilst they are awaiting a response to the tool. The research team will  
53  
54 be notified automatically that a participant is awaiting a response, ensuring that in normal  
55  
56 working hours patients receive a rapid reply. They will also be advised that if they access  
57  
58  
59  
60

1 the tool at night, that it will not be reviewed until the following day. They will be advised to  
2 contact out-of-hours services if they require an overnight assessment. These actions will  
3 prevent any harm to patients resulting from a delayed response to the wound assessment  
4 tool. A potential consequence of closer follow-up of these postoperative patients could be  
5 increased identification of superficial SSI which would likely otherwise self-resolve, however  
6 this would closer surveillance or treatment if appropriate (this decision is made by an  
7 independent clinician at the time of review). Due to the low-risk nature of the trial, a formal  
8 data-monitoring committee has not been nominated.

### ***Data Protection and Management***

9 All participant data will be stored securely in a REDCap<sup>13</sup> database that has controlled  
10 access and is password protected. This data will be anonymised, and only available to  
11 researchers listed on the protocol. Participant responses to the questionnaire will be  
12 reported directly to the REDCap database and will not be stored on patient phones.  
13 However, patients will be advised to review the security setting on their phone if they intend  
14 to store their wound photographs. Patient details will be recorded in a trial log should any  
15 safety concerns arise necessitating they be contacted.

### ***Ethical Approval and Dissemination Plan***

16 The study design and protocol were reviewed and approved by Southeast Scotland  
17 Research and Ethics Committee (REC Ref: 16/SS/0072 24/05/2016), and any protocol  
18 amendments will be resubmitted for review. The study is sponsored by ACCORD, a  
19 collaboration between the University of Edinburgh and NHS Lothian Research and  
20 Development. In line with Good Clinical Practice Guidance, written consent will be obtained  
21 by appropriately trained medical students or clinicians. Participation is voluntary and a



1 patient's decision regarding participation will not affect any aspect of their care in the case  
2  
3  
4 of refusal. Participants will have the right to withdraw from the study at any point.  
5  
6  
7

8 Authorship on any papers derived from the study will be all authors involved in study design  
9  
10 and protocol development, and any additional researchers involved in the writing group.  
11  
12

13 Furthermore, patient recruiters who have recruited more than the prespecified 15 patients  
14  
15 to the study will be listed as a "collaborator". All other persons involved in the study will be  
16  
17 listed in the acknowledgements.  
18  
19

20  
21  
22 There are no financial and other competing interests for principal investigators for the  
23  
24 overall trial or either study site. Study findings will be reported in line with CONSORT  
25  
26 guidelines, and disseminated in the printed media, and learned forums, and are expected in  
27  
28 2020. A written lay summary will be available to study participants on request.  
29  
30  
31

### 32 ***Patient and Public Involvement***

33  
34 Patients were not directly involved in the design or delivery of this trial, however data on  
35  
36 patient experience in using the smartphone tool will be evaluated via a follow-up  
37  
38 questionnaire. This will inform future development and dissemination of this intervention. A  
39  
40 summary of results will be provided to all patients involved once the trial has been  
41  
42 completed and analysed.  
43  
44  
45  
46  
47  
48  
49  
50  
51  
52  
53  
54  
55  
56  
57  
58  
59  
60

## Authors' Contributions

(1) Conception and design: KEM, CAS, TMD, KAM, RO, AS, RS, MP, SJW, EH. (2) Drafting the manuscript: KAM, KEM, CAS, TMD, RO, SRK, CJF, AS. (4) Critical revision of the manuscript for scientific and factual content: KAM, KEM, CAS, TMD, RO, SRK, CJF, AS, RS, MP, SJW, EH. Supervision: RS, MP, SJW, EH. All authors read and approved the final manuscript.

## Funding

This research received no specific grant from any funding agency in the public, commercial or not-for-profit sectors.

## Competing interests

The authors do not have any conflicts of interest to declare.

**Word Count:** 3,158

**Figure 1:** Schema of trial events for intervention and control arms.

**Figure 2:** Handling of wound questionnaire submissions.

## Tables:

**Table 1:** Questions included in smartphone-delivered questionnaire and independent algorithm scoring system.

| Smartphone-delivered wound assessment                                                                    |                                                                                                                              | Algorithm scoring system |                          |                          |
|----------------------------------------------------------------------------------------------------------|------------------------------------------------------------------------------------------------------------------------------|--------------------------|--------------------------|--------------------------|
| Question                                                                                                 | Response (score)                                                                                                             | Low-risk                 | Medium-Risk              | High-risk                |
| Is the pain worse than immediately after the operation?                                                  | No (0), Yes (1)                                                                                                              | Inflammation<br>Score 0  | Inflammation<br>Score ≤2 | Inflammation<br>Score ≥3 |
| Is there new redness around your wound site excluding the wound itself?                                  | No (0), Yes (1)                                                                                                              |                          |                          |                          |
| Is there more swelling around your wound site than at the time of surgery?                               | No (0), Yes (1)                                                                                                              |                          |                          |                          |
| Are you experiencing a new burning sensation or heat at the wound site?                                  | No (0), Yes (1)                                                                                                              |                          |                          |                          |
|                                                                                                          |                                                                                                                              | <b>AND</b>               | <b>AND</b>               | <b>OR</b>                |
| Is there liquid coming from the wound site? If so, please select which option best describes the liquid. | No (0),<br>Yes – clear (1),<br>Yes – bloody (1),<br>Yes – yellowish (1),<br>Yes – thick/yellow (2),<br>Yes – green/brown (2) | Discharge<br>Score 0     | Discharge<br>Score ≤1    | Discharge<br>Score 2     |
| Is your wound opening or gaping?                                                                         | No, Yes                                                                                                                      | Not scored in algorithm  |                          |                          |
| Have you experienced fevers in the last 24 hours?                                                        | No, Yes                                                                                                                      |                          |                          |                          |
| Please upload a photograph of your wound.                                                                | Photograph                                                                                                                   | Not scored in algorithm  |                          |                          |

**Table 2:** Questions included in smartphone-delivered 30-day patient experience questionnaire.

| Smartphone-delivered 30-day patient experience questionnaire                                                       |                                                                           |
|--------------------------------------------------------------------------------------------------------------------|---------------------------------------------------------------------------|
| Question                                                                                                           | Available responses                                                       |
| 1. Did you have access to the smartphone tool?                                                                     | Yes, No                                                                   |
| 2. If you had access to the tool, how many times did you use the tool (not including the reminder questions sent)? | [integer]                                                                 |
| 3. If you had access to the tool, please rate the extent to which you agree/disagree with the statements below:    |                                                                           |
| a. The tool was easy to use                                                                                        | Strongly Disagree, Disagree, Neutral / No opinion, Agree, Strongly Agree. |
| b. I understood the questions in the tool                                                                          |                                                                           |
| c. It was easy to upload my wound photo                                                                            |                                                                           |
| d. The response from the tool was helpful                                                                          |                                                                           |
| 4. Please rate the extent to which you agree/disagree with the statements below:                                   |                                                                           |
| a. It was easy to get hold of advice about my wound when needed                                                    | Strongly Disagree, Disagree, Neutral / No opinion, Agree, Strongly Agree. |
| b. I had to wait more than 1 day for advice about my wound                                                         |                                                                           |
| c. The advice I received about my wound was useful                                                                 |                                                                           |

## References:

- Public Health England. Surgical site infection surveillance service (SSISS). 2014
- Health Protection Scotland (HPS). Scottish surveillance of healthcare associated infection Programme (SSHAIP). 2012
- Pham JC, Ashton MJ, Kimata C, et al. Surgical site infection: Comparing surgeon versus patient self-report. *Journal of Surgical Research* 2016;202(1):95-102.
- Imison C, Castle-Clarke S, Watson R, et al. Delivering the benefits of digital health care research summary, 2016.
- Zhou YY, Kanter MH, Wang JJ, et al. Improved quality at Kaiser Permanente through e-mail between physicians and patients. *Health Affairs* 2010;29(7):1370-75.
- Caffery L, Smith A. A Literature Review of Email-based Telemedicine. *Studies in Health Technology and Informatics* 2010;161:20-34.
- Hex N, Tuggey J, Wright D, et al. Telemedicine in care homes in Airedale, Wharfedale and craven. *Clinical Governance: An International Journal* 2015;20(3):146-54.

- 1  
2 8. Office of Communications (OFCOM). Communications Market Report 2018. London:  
3 OFCOM, 2019.
- 4  
5 9. Armstrong KA, Coyte PC, Brown M, et al. Effect of Home Monitoring via Mobile App on  
6 the Number of In-Person Visits Following Ambulatory Surgery: A Randomized Clinical  
7 Trial Monitoring via Mobile App and In-Person Visits After Ambulatory Surgery. *JAMA*  
8 *Surgery* 2017;152(7):622-27.
- 9  
10 10. Gunter RL, Chouinard S, Fernandes-Taylor S, et al. Current Use of Telemedicine for  
11 Post-Discharge Surgical Care: A Systematic Review. *Journal of the American College*  
12 *of Surgeons* 2016;222(5):915-27.
- 13  
14 11. Gunter RL, Fernandes-Taylor S, Rahman S, et al. Feasibility of an Image-Based Mobile  
15 Health Protocol for Postoperative Wound Monitoring. *Journal of the American College*  
16 *of Surgeons* 2018;226(3):277-86.
- 17  
18 12. Kummerow Broman K, Gaskill CE, Faqih A, et al. Evaluation of Wound Photography for  
19 Remote Postoperative Assessment of Surgical Site Infections. *JAMA Surgery*  
20 2019;154(2):117-24.
- 21  
22 13. Harris PA, Taylor R, Thielke R, et al. Research electronic data capture (REDCap)—A  
23 metadata-driven methodology and workflow process for providing translational research  
24 informatics support. *Journal of Biomedical Informatics* 2009;42(2):377-81.
- 25  
26 14. Centre for Disease Control and Prevention (CDC) National Healthcare Safety Network  
27 (NHSN). Patient Safety Component (PSC) Manual Chapter 9: Surgical site infection  
28 (SSI) event. In: CDC, ed. Atlanta: CDC, 2016.
- 29  
30 15. Wilson APR, Sturridge MF, Treasure T, et al. A scoring method (ASEPSIS) for  
31 postoperative wound infections for use in clinical trials of antibiotic prophylaxis. *The*  
32 *Lancet* 1986;327(8476):311-12.
- 33  
34  
35  
36  
37  
38  
39  
40  
41  
42  
43  
44  
45  
46  
47  
48  
49  
50  
51  
52  
53  
54  
55  
56  
57  
58  
59  
60



Figure 1: Schema of trial events for intervention and control arms

812x453mm (120 x 120 DPI)

1  
2  
3  
4  
5  
6  
7  
8  
9  
10  
11  
12  
13  
14  
15  
16  
17  
18  
19  
20  
21  
22  
23  
24  
25  
26  
27  
28  
29  
30  
31  
32  
33  
34  
35  
36  
37  
38  
39  
40  
41  
42  
43  
44  
45  
46  
47  
48  
49  
50  
51  
52  
53  
54  
55  
56  
57  
58  
59  
60

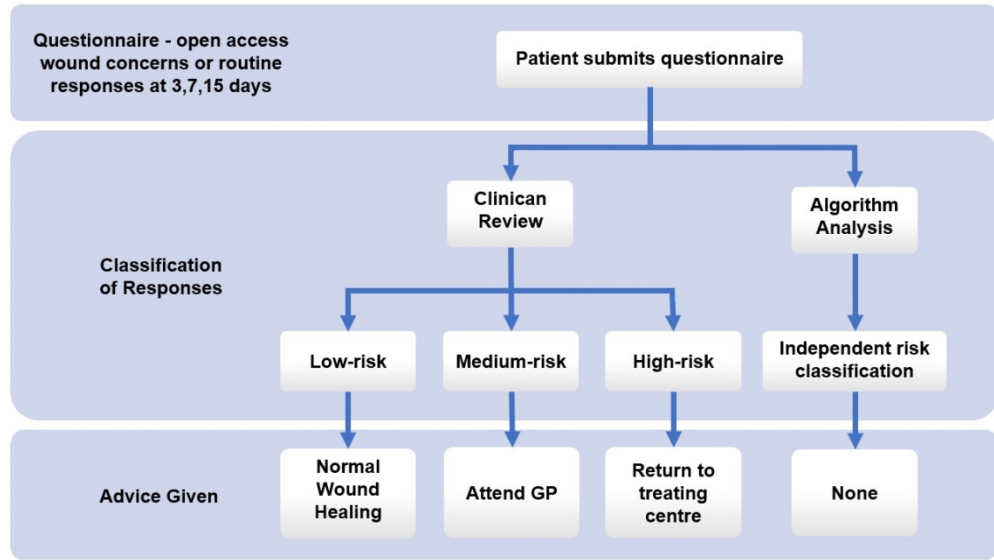

Figure 2: Handling of wound questionnaire submissions

811x454mm (120 x 120 DPI)

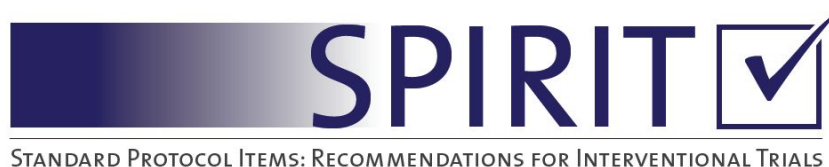

SPIRIT 2013 Checklist: Recommended items to address in a clinical trial protocol and related documents\*

| Section/item                      | Item No | Description                                                                                                                                                                                                                                                                                                                                                                |
|-----------------------------------|---------|----------------------------------------------------------------------------------------------------------------------------------------------------------------------------------------------------------------------------------------------------------------------------------------------------------------------------------------------------------------------------|
| <b>Administrative information</b> |         |                                                                                                                                                                                                                                                                                                                                                                            |
| Title                             | 1       | Descriptive title identifying the study design, population, interventions, and, if applicable, trial acronym<br><br><b>Can a smartphone-delivered tool facilitate the assessment of surgical site infection and result in earlier treatment? Tracking Wound Infection with Smartphone Technology (TWIST): a randomized-controlled trial in emergency surgery patients.</b> |
| Trial registration                | 2a      | Trial identifier and registry name. If not yet registered, name of intended registry.<br><b>ClinicalTrials.gov. Reference No: NCT02704897</b>                                                                                                                                                                                                                              |
|                                   | 2b      | All items from the World Health Organization Trial Registration Data Set<br><b>ClinicalTrials.gov. Reference No: NCT02704897</b>                                                                                                                                                                                                                                           |
| Protocol version                  | 3       | Date and version identifier<br><b>Page 1</b>                                                                                                                                                                                                                                                                                                                               |
| Funding                           | 4       | Sources and types of financial, material, and other support<br><b>Page 1</b>                                                                                                                                                                                                                                                                                               |
| Roles and responsibilities        | 5a      | Names, affiliations, and roles of protocol contributors<br><b>Page 1</b>                                                                                                                                                                                                                                                                                                   |
|                                   | 5b      | Name and contact information for the trial sponsor<br><b>Page 1</b>                                                                                                                                                                                                                                                                                                        |
|                                   | 5c      | Role of study sponsor and funders, if any, in study design; collection, management, analysis, and interpretation of data; writing of the report; and the decision to submit the report for publication, including whether they will have ultimate authority over any of these activities<br><b>Page 1</b>                                                                  |



- 1  
2  
3  
4  
5  
6  
7  
8  
9
- 5d Composition, roles, and responsibilities of the coordinating centre, steering committee, endpoint adjudication committee, data management team, and other individuals or groups overseeing the trial, if applicable (see Item 21a for data monitoring committee)  
**Page 1**

## Introduction

- 10  
11  
12  
13  
14  
15  
16  
17  
18  
19  
20  
21  
22  
23  
24  
25  
26  
27  
28
- Background and rationale 6a Description of research question and justification for undertaking the trial, including summary of relevant studies (published and unpublished) examining benefits and harms for each intervention  
**Page 5-6**
- 6b Explanation for choice of comparators  
**Page 5-6**
- Objectives 7 Specific objectives or hypotheses  
**Page 7**
- Trial design 8 Description of trial design including type of trial (eg, parallel group, crossover, factorial, single group), allocation ratio, and framework (eg, superiority, equivalence, noninferiority, exploratory)  
**Page 8 (overview)**

## Methods: Participants, interventions, and outcomes

- 29  
30  
31  
32  
33  
34  
35  
36  
37  
38  
39  
40  
41  
42  
43  
44  
45  
46  
47  
48  
49  
50  
51  
52  
53  
54  
55  
56  
57  
58  
59  
60
- Study setting 9 Description of study settings (eg, community clinic, academic hospital) and list of countries where data will be collected. Reference to where list of study sites can be obtained  
**Page 8 (research setting)**
- Eligibility criteria 10 Inclusion and exclusion criteria for participants. If applicable, eligibility criteria for study centres and individuals who will perform the interventions (eg, surgeons, psychotherapists)  
**Page 8-9 (Patients, inclusion criteria, exclusion criteria)**
- Interventions 11a Interventions for each group with sufficient detail to allow replication, including how and when they will be administered.  
**Page 10-13**
- 11b Criteria for discontinuing or modifying allocated interventions for a given trial participant (eg, drug dose change in response to harms, participant request, or improving/worsening disease).  
**Page 17**
- 11c Strategies to improve adherence to intervention protocols, and any procedures for monitoring adherence (eg, drug tablet return, laboratory tests).  
**N/A**

|    |                      |     |                                                                                                                                                                                                                                                                                                                                                                                |
|----|----------------------|-----|--------------------------------------------------------------------------------------------------------------------------------------------------------------------------------------------------------------------------------------------------------------------------------------------------------------------------------------------------------------------------------|
| 1  |                      |     |                                                                                                                                                                                                                                                                                                                                                                                |
| 2  |                      | 11d | Relevant concomitant care and interventions that are permitted or prohibited during the trial                                                                                                                                                                                                                                                                                  |
| 3  |                      |     | <b>N/A</b>                                                                                                                                                                                                                                                                                                                                                                     |
| 4  |                      |     |                                                                                                                                                                                                                                                                                                                                                                                |
| 5  |                      |     |                                                                                                                                                                                                                                                                                                                                                                                |
| 6  | Outcomes             | 12  | Primary, secondary, and other outcomes, including the specific measurement variable (eg, systolic blood pressure), analysis metric (eg, change from baseline, final value, time to event), method of aggregation (eg, median, proportion), and time point for each outcome. Explanation of the clinical relevance of chosen efficacy and harm outcomes is strongly recommended |
| 7  |                      |     | <b>Page 14 (outcome measures)</b>                                                                                                                                                                                                                                                                                                                                              |
| 8  |                      |     |                                                                                                                                                                                                                                                                                                                                                                                |
| 9  |                      |     |                                                                                                                                                                                                                                                                                                                                                                                |
| 10 |                      |     |                                                                                                                                                                                                                                                                                                                                                                                |
| 11 |                      |     |                                                                                                                                                                                                                                                                                                                                                                                |
| 12 |                      |     |                                                                                                                                                                                                                                                                                                                                                                                |
| 13 |                      |     |                                                                                                                                                                                                                                                                                                                                                                                |
| 14 |                      |     |                                                                                                                                                                                                                                                                                                                                                                                |
| 15 | Participant timeline | 13  | Time schedule of enrolment, interventions (including any run-ins and washouts), assessments, and visits for participants. A schematic diagram is highly recommended (see Figure)                                                                                                                                                                                               |
| 16 |                      |     | <b>Figure 1</b>                                                                                                                                                                                                                                                                                                                                                                |
| 17 |                      |     |                                                                                                                                                                                                                                                                                                                                                                                |
| 18 |                      |     |                                                                                                                                                                                                                                                                                                                                                                                |
| 19 |                      |     |                                                                                                                                                                                                                                                                                                                                                                                |
| 20 |                      |     |                                                                                                                                                                                                                                                                                                                                                                                |
| 21 | Sample size          | 14  | Estimated number of participants needed to achieve study objectives and how it was determined, including clinical and statistical assumptions supporting any sample size calculations                                                                                                                                                                                          |
| 22 |                      |     | <b>Page 15 (Sample Size and Power Analysis).</b>                                                                                                                                                                                                                                                                                                                               |
| 23 |                      |     |                                                                                                                                                                                                                                                                                                                                                                                |
| 24 |                      |     |                                                                                                                                                                                                                                                                                                                                                                                |
| 25 |                      |     |                                                                                                                                                                                                                                                                                                                                                                                |
| 26 |                      |     |                                                                                                                                                                                                                                                                                                                                                                                |
| 27 | Recruitment          | 15  | Strategies for achieving adequate participant enrolment to reach target sample size.                                                                                                                                                                                                                                                                                           |
| 28 |                      |     | <b>Page 9 (Recruitment)</b>                                                                                                                                                                                                                                                                                                                                                    |
| 29 |                      |     |                                                                                                                                                                                                                                                                                                                                                                                |
| 30 |                      |     |                                                                                                                                                                                                                                                                                                                                                                                |

### Methods: Assignment of interventions (for controlled trials)

#### Allocation:

|    |                                  |     |                                                                                                                                                                                                                                                                                                                                                          |
|----|----------------------------------|-----|----------------------------------------------------------------------------------------------------------------------------------------------------------------------------------------------------------------------------------------------------------------------------------------------------------------------------------------------------------|
| 31 |                                  |     |                                                                                                                                                                                                                                                                                                                                                          |
| 32 |                                  |     |                                                                                                                                                                                                                                                                                                                                                          |
| 33 |                                  |     |                                                                                                                                                                                                                                                                                                                                                          |
| 34 |                                  |     |                                                                                                                                                                                                                                                                                                                                                          |
| 35 | Sequence generation              | 16a | Method of generating the allocation sequence (eg, computer-generated random numbers), and list of any factors for stratification. To reduce predictability of a random sequence, details of any planned restriction (eg, blocking) should be provided in a separate document that is unavailable to those who enrol participants or assign interventions |
| 36 |                                  |     | <b>Page 10 (Randomisation and Blinding).</b>                                                                                                                                                                                                                                                                                                             |
| 37 |                                  |     |                                                                                                                                                                                                                                                                                                                                                          |
| 38 |                                  |     |                                                                                                                                                                                                                                                                                                                                                          |
| 39 |                                  |     |                                                                                                                                                                                                                                                                                                                                                          |
| 40 |                                  |     |                                                                                                                                                                                                                                                                                                                                                          |
| 41 |                                  |     |                                                                                                                                                                                                                                                                                                                                                          |
| 42 |                                  |     |                                                                                                                                                                                                                                                                                                                                                          |
| 43 |                                  |     |                                                                                                                                                                                                                                                                                                                                                          |
| 44 |                                  |     |                                                                                                                                                                                                                                                                                                                                                          |
| 45 | Allocation concealment mechanism | 16b | Mechanism of implementing the allocation sequence (eg, central telephone; sequentially numbered, opaque, sealed envelopes), describing any steps to conceal the sequence until interventions are assigned                                                                                                                                                |
| 46 |                                  |     | <b>Page 10 (Randomisation and Blinding).</b>                                                                                                                                                                                                                                                                                                             |
| 47 |                                  |     |                                                                                                                                                                                                                                                                                                                                                          |
| 48 |                                  |     |                                                                                                                                                                                                                                                                                                                                                          |
| 49 |                                  |     |                                                                                                                                                                                                                                                                                                                                                          |
| 50 |                                  |     |                                                                                                                                                                                                                                                                                                                                                          |
| 51 |                                  |     |                                                                                                                                                                                                                                                                                                                                                          |
| 52 | Implementation                   | 16c | Who will generate the allocation sequence, who will enrol participants, and who will assign participants to interventions                                                                                                                                                                                                                                |
| 53 |                                  |     | <b>Page 10 (Randomisation and Blinding).</b>                                                                                                                                                                                                                                                                                                             |
| 54 |                                  |     |                                                                                                                                                                                                                                                                                                                                                          |
| 55 |                                  |     |                                                                                                                                                                                                                                                                                                                                                          |
| 56 |                                  |     |                                                                                                                                                                                                                                                                                                                                                          |
| 57 |                                  |     |                                                                                                                                                                                                                                                                                                                                                          |
| 58 |                                  |     |                                                                                                                                                                                                                                                                                                                                                          |
| 59 |                                  |     |                                                                                                                                                                                                                                                                                                                                                          |
| 60 |                                  |     |                                                                                                                                                                                                                                                                                                                                                          |

- 1  
2  
3  
4  
5  
6  
7  
8  
9  
10  
11  
12
- Blinding (masking) 17a Who will be blinded after assignment to interventions (eg, trial participants, care providers, outcome assessors, data analysts), and how.  
**Page 10 (Randomisation and Blinding).**
- 17b If blinded, circumstances under which unblinding is permissible, and procedure for revealing a participant's allocated intervention during the trial  
**N/A**

13  
14

### Methods: Data collection, management, and analysis

- 15  
16  
17  
18  
19  
20  
21  
22  
23  
24  
25  
26  
27  
28  
29  
30  
31  
32
- Data collection methods 18a Plans for assessment and collection of outcome, baseline, and other trial data, including any related processes to promote data quality (eg, duplicate measurements, training of assessors) and a description of study instruments (eg, questionnaires, laboratory tests) along with their reliability and validity, if known. Reference to where data collection forms can be found, if not in the protocol  
**Page 9 (Recruitment); Page 10 (Smartphone-Delivered Wound Assessment Tool); Table 1**
- 18b Plans to promote participant retention and complete follow-up, including list of any outcome data to be collected for participants who discontinue or deviate from intervention protocols  
**Page 10 (Smartphone-Delivered Wound Assessment Tool); Page 13 (Data analysis plan)**
- 33  
34  
35  
36  
37  
38  
39
- Data management 19 Plans for data entry, coding, security, and storage, including any related processes to promote data quality (eg, double data entry; range checks for data values). Reference to where details of data management procedures can be found, if not in the protocol.  
**Page 16 (Data Protection and Management).**
- 40  
41  
42  
43  
44  
45  
46  
47  
48  
49  
50  
51  
52  
53  
54  
55  
56  
57  
58  
59  
60
- Statistical methods 20a Statistical methods for analysing primary and secondary outcomes. Reference to where other details of the statistical analysis plan can be found, if not in the protocol.  
**Page 13 (Data Analysis Plan / Outcome Measures)**
- 20b Methods for any additional analyses (eg, subgroup and adjusted analyses)  
**Page 13 (Data Analysis Plan / Outcome Measures)**
- 20c Definition of analysis population relating to protocol non-adherence (eg, as randomised analysis), and any statistical methods to handle missing data (eg, multiple imputation)  
**Page 13 (Data Analysis Plan / Outcome Measures)**

## Methods: Monitoring

|                                 |     |                                                                                                                                                                                                                                                                                                                                                                  |
|---------------------------------|-----|------------------------------------------------------------------------------------------------------------------------------------------------------------------------------------------------------------------------------------------------------------------------------------------------------------------------------------------------------------------|
| Data monitoring                 | 21a | Composition of data monitoring committee (DMC); summary of its role and reporting structure; statement of whether it is independent from the sponsor and competing interests; and reference to where further details about its charter can be found, if not in the protocol. Alternatively, an explanation of why a DMC is not needed<br><b>Page 16 (safety)</b> |
|                                 | 21b | Description of any interim analyses and stopping guidelines, including who will have access to these interim results and make the final decision to terminate the trial<br><b>N/A</b>                                                                                                                                                                            |
| Harms                           | 22  | Plans for collecting, assessing, reporting, and managing solicited and spontaneously reported adverse events and other unintended effects of trial interventions or trial conduct<br><b>Page 16 (safety)</b>                                                                                                                                                     |
| Auditing                        | 23  | Frequency and procedures for auditing trial conduct, if any, and whether the process will be independent from investigators and the sponsor<br><b>N/A</b>                                                                                                                                                                                                        |
| <b>Ethics and dissemination</b> |     |                                                                                                                                                                                                                                                                                                                                                                  |
| Research ethics approval        | 24  | Plans for seeking research ethics committee/institutional review board (REC/IRB) approval<br><b>Page 17 (Ethical Approval and Dissemination Plan)</b>                                                                                                                                                                                                            |
| Protocol amendments             | 25  | Plans for communicating important protocol modifications (eg, changes to eligibility criteria, outcomes, analyses) to relevant parties (eg, investigators, REC/IRBs, trial participants, trial registries, journals, regulators)<br><b>Page 17 (Ethical Approval and Dissemination Plan)</b>                                                                     |
| Consent or assent               | 26a | Who will obtain informed consent or assent from potential trial participants or authorised surrogates, and how (see Item 32)<br><b>Page 17 (Ethical Approval and Dissemination Plan)</b>                                                                                                                                                                         |
|                                 | 26b | Additional consent provisions for collection and use of participant data and biological specimens in ancillary studies, if applicable<br><b>N/A</b>                                                                                                                                                                                                              |
| Confidentiality                 | 27  | How personal information about potential and enrolled participants will be collected, shared, and maintained in order to protect confidentiality before, during, and after the trial<br><b>Page 16 (Data Protection and Management)</b>                                                                                                                          |

|    |                   |     |                                                                              |
|----|-------------------|-----|------------------------------------------------------------------------------|
| 1  |                   |     |                                                                              |
| 2  | Declaration of    | 28  | Financial and other competing interests for principal investigators for      |
| 3  | interests         |     | the overall trial and each study site                                        |
| 4  |                   |     | <b>Page 18</b>                                                               |
| 5  |                   |     |                                                                              |
| 6  | Access to data    | 29  | Statement of who will have access to the final trial dataset, and            |
| 7  |                   |     | disclosure of contractual agreements that limit such access for              |
| 8  |                   |     | investigators                                                                |
| 9  |                   |     | <b>Page 16 (Data Protection and Management)</b>                              |
| 10 |                   |     |                                                                              |
| 11 | Ancillary and     | 30  | Provisions, if any, for ancillary and post-trial care, and for               |
| 12 | post-trial care   |     | compensation to those who suffer harm from trial participation               |
| 13 |                   |     | <b>N/A</b>                                                                   |
| 14 |                   |     |                                                                              |
| 15 |                   |     |                                                                              |
| 16 | Dissemination     | 31a | Plans for investigators and sponsor to communicate trial results to          |
| 17 | policy            |     | participants, healthcare professionals, the public, and other relevant       |
| 18 |                   |     | groups (eg, via publication, reporting in results databases, or other        |
| 19 |                   |     | data sharing arrangements), including any publication restrictions           |
| 20 |                   |     | <b>Page 17 (Ethical Approval and Dissemination Plan)</b>                     |
| 21 |                   |     |                                                                              |
| 22 |                   |     |                                                                              |
| 23 |                   | 31b | Authorship eligibility guidelines and any intended use of professional       |
| 24 |                   |     | writers                                                                      |
| 25 |                   |     | <b>Page 17 (Ethical Approval and Dissemination Plan)</b>                     |
| 26 |                   |     |                                                                              |
| 27 |                   |     |                                                                              |
| 28 |                   | 31c | Plans, if any, for granting public access to the full protocol, participant- |
| 29 |                   |     | level dataset, and statistical code                                          |
| 30 |                   |     | <b>N/A</b>                                                                   |
| 31 |                   |     |                                                                              |
| 32 |                   |     |                                                                              |
| 33 | <b>Appendices</b> |     |                                                                              |
| 34 |                   |     |                                                                              |
| 35 | Informed consent  | 32  | Model consent form and other related documentation given to                  |
| 36 | materials         |     | participants and authorised surrogates                                       |
| 37 |                   |     | <b>Supplementary File</b>                                                    |
| 38 |                   |     |                                                                              |
| 39 | Biological        | 33  | Plans for collection, laboratory evaluation, and storage of biological       |
| 40 | specimens         |     | specimens for genetic or molecular analysis in the current trial and for     |
| 41 |                   |     | future use in ancillary studies, if applicable                               |
| 42 |                   |     | <b>N/A</b>                                                                   |
| 43 |                   |     |                                                                              |

---

\*It is strongly recommended that this checklist be read in conjunction with the SPIRIT 2013 Explanation & Elaboration for important clarification on the items. Amendments to the protocol should be tracked and dated. The SPIRIT checklist is copyrighted by the SPIRIT Group under the Creative Commons "[Attribution-NonCommercial-NoDerivs 3.0 Unported](https://creativecommons.org/licenses/by-nc-nd/3.0/)" license.

# BMJ Open

**Can a smartphone-delivered tool facilitate the assessment of surgical site infection and result in earlier treatment? Tracking Wound Infection with Smartphone Technology (TWIST): protocol for a randomized-controlled trial in emergency surgery patients.**

|                                 |                                                                                                                                                                                                                                                                                                                                                                                                                                                                                                                                                                                                                                                                                                                                                                                                                                                                                                                                                                                                                                                                                                                                                                                                                                                                                                                                                                                                                                                                                                                                                                                                                                                                                |
|---------------------------------|--------------------------------------------------------------------------------------------------------------------------------------------------------------------------------------------------------------------------------------------------------------------------------------------------------------------------------------------------------------------------------------------------------------------------------------------------------------------------------------------------------------------------------------------------------------------------------------------------------------------------------------------------------------------------------------------------------------------------------------------------------------------------------------------------------------------------------------------------------------------------------------------------------------------------------------------------------------------------------------------------------------------------------------------------------------------------------------------------------------------------------------------------------------------------------------------------------------------------------------------------------------------------------------------------------------------------------------------------------------------------------------------------------------------------------------------------------------------------------------------------------------------------------------------------------------------------------------------------------------------------------------------------------------------------------|
| Journal:                        | <i>BMJ Open</i>                                                                                                                                                                                                                                                                                                                                                                                                                                                                                                                                                                                                                                                                                                                                                                                                                                                                                                                                                                                                                                                                                                                                                                                                                                                                                                                                                                                                                                                                                                                                                                                                                                                                |
| Manuscript ID                   | bmjopen-2019-029620.R2                                                                                                                                                                                                                                                                                                                                                                                                                                                                                                                                                                                                                                                                                                                                                                                                                                                                                                                                                                                                                                                                                                                                                                                                                                                                                                                                                                                                                                                                                                                                                                                                                                                         |
| Article Type:                   | Protocol                                                                                                                                                                                                                                                                                                                                                                                                                                                                                                                                                                                                                                                                                                                                                                                                                                                                                                                                                                                                                                                                                                                                                                                                                                                                                                                                                                                                                                                                                                                                                                                                                                                                       |
| Date Submitted by the Author:   | 01-Aug-2019                                                                                                                                                                                                                                                                                                                                                                                                                                                                                                                                                                                                                                                                                                                                                                                                                                                                                                                                                                                                                                                                                                                                                                                                                                                                                                                                                                                                                                                                                                                                                                                                                                                                    |
| Complete List of Authors:       | McLean, Kenneth; University of Edinburgh, 51 Little France Crescent, Edinburgh, EH16 4SA, United Kingdom, Department of Clinical Surgery, Mountain, Katie; University of Edinburgh, 51 Little France Crescent, Edinburgh, EH16 4SA, United Kingdom, Department of Clinical Surgery, Shaw, Catherine; University of Edinburgh, 51 Little France Crescent, Edinburgh, EH16 4SA, United Kingdom, Department of Clinical Surgery, Drake, Thomas ; University of Edinburgh, 51 Little France Crescent, Edinburgh, EH16 4SA, United Kingdom, Department of Clinical Surgery, Ots, Riinu; University of Edinburgh, 51 Little France Crescent, Edinburgh, EH16 4SA, United Kingdom, Department of Clinical Surgery, Knight, Stephen; University of Edinburgh, 51 Little France Crescent, Edinburgh, EH16 4SA, United Kingdom, Department of Clinical Surgery, Fairfield, Cameron; University of Edinburgh, 51 Little France Crescent, Edinburgh, EH16 4SA, United Kingdom, Department of Clinical Surgery, Sgrò, Alessandro; University of Edinburgh, 51 Little France Crescent, Edinburgh, EH16 4SA, United Kingdom, Department of Clinical Surgery, Skipworth, Richard; University of Edinburgh, 51 Little France Crescent, Edinburgh, EH16 4SA, United Kingdom, Department of Clinical Surgery, Wigmore, Stephen; University of Edinburgh, 51 Little France Crescent, Edinburgh, EH16 4SA, United Kingdom, Department of Clinical Surgery, Potter, Mark; Western General Hospital, Crewe Rd S, Edinburgh, EH4 2XU, UK, Colorectal Unit<br>Harrison, Ewen ; University of Edinburgh, 51 Little France Crescent, Edinburgh, EH16 4SA, United Kingdom, Department of Clinical Surgery, |
| <b>Primary Subject Heading</b>: | Surgery                                                                                                                                                                                                                                                                                                                                                                                                                                                                                                                                                                                                                                                                                                                                                                                                                                                                                                                                                                                                                                                                                                                                                                                                                                                                                                                                                                                                                                                                                                                                                                                                                                                                        |
| Secondary Subject Heading:      | Health informatics, Patient-centred medicine                                                                                                                                                                                                                                                                                                                                                                                                                                                                                                                                                                                                                                                                                                                                                                                                                                                                                                                                                                                                                                                                                                                                                                                                                                                                                                                                                                                                                                                                                                                                                                                                                                   |
| Keywords:                       | Surgical Site Infection, SURGERY, smartphone technology                                                                                                                                                                                                                                                                                                                                                                                                                                                                                                                                                                                                                                                                                                                                                                                                                                                                                                                                                                                                                                                                                                                                                                                                                                                                                                                                                                                                                                                                                                                                                                                                                        |
|                                 |                                                                                                                                                                                                                                                                                                                                                                                                                                                                                                                                                                                                                                                                                                                                                                                                                                                                                                                                                                                                                                                                                                                                                                                                                                                                                                                                                                                                                                                                                                                                                                                                                                                                                |

1  
2  
3  
4  
5  
6  
7  
8  
9  
10  
11  
12  
13  
14  
15  
16  
17  
18  
19  
20  
21  
22  
23  
24  
25  
26  
27  
28  
29  
30  
31  
32  
33  
34  
35  
36  
37  
38  
39  
40  
41  
42  
43  
44  
45  
46  
47  
48  
49  
50  
51  
52  
53  
54  
55  
56  
57  
58  
59  
60



1  
2  
3 **Can a smartphone-delivered tool facilitate the assessment of surgical**  
4 **site infection and result in earlier treatment? Tracking Wound Infection**  
5 **with Smartphone Technology (TWIST): protocol for a randomized-**  
6 **controlled trial in emergency surgery patients.**  
7  
8  
9  
10  
11  
12  
13  
14

15 **Trial Registration:** *ClinicalTrials.gov*. Reference No: NCT02704897  
16

17  
18 **Protocol version:** 2.0.  
19

20  
21 **Funding:** This research received no specific grant from any funding agency in the public,  
22 commercial or not-for-profit sectors.  
23  
24

25  
26 **Roles and responsibilities:**

27 McLean KA<sup>1</sup>, Mountain KE <sup>1</sup>, Shaw CA<sup>1</sup>, Drake TM<sup>1</sup>, Ots R<sup>1</sup>, Knight SR<sup>1</sup>, Fairfield CJ<sup>1</sup>, Sgrò  
28 A<sup>1</sup>, Skipworth R<sup>1</sup>, Wigmore SJ<sup>1</sup>, Potter M<sup>2</sup>, Harrison E<sup>1</sup>  
29

- 30  
31 1. Department of Clinical Surgery, Royal Infirmary of Edinburgh, University of  
32 Edinburgh, Edinburgh, EH16 4SA, UK  
33  
34 2. Colorectal Unit, Western General Hospital, Crewe Rd S, Edinburgh, EH4 2XU, UK  
35  
36  
37

38  
39 **Address for Correspondence**

40 Dr Kenneth A McLean  
41 Department of Clinical Surgery  
42 Royal Infirmary Edinburgh  
43 51 Little France Crescent  
44 Edinburgh  
45 EH16 4SA  
46 United Kingdom  
47

48  
49 Telephone: +44(0) 131 242 3614  
50 Email: v1kmcle6@ed.ac.uk  
51

52  
53 **Keywords:** *Surgical Site Infection, smartphone technology, surgery*  
54

55  
56 **MeSH Terms:** *Surgical Wound Infection\*, Diagnosis, Smartphone, General Surgery*  
57  
58  
59  
60



## **Abstract**

## **Introduction**

National data suggest that surgical site infection (SSI) complicates 2-10% of general surgery cases, although the patient-reported incidence is much higher. SSIs cause significant patient morbidity and represent a significant burden on acute healthcare services, in a cohort predominantly suitable for outpatient management. Over three-quarters of UK adults now own smartphones, which could be harnessed to improve access to care. We aim to investigate if a smartphone-delivered wound assessment tool results in earlier treatment.

## **Methods and Analysis**

This is a randomised-controlled trial aiming to recruit 500 patients across NHS hospitals. All emergency abdominal surgery patients over the age of 16 who own smartphones will be considered eligible, with the exclusion of those with significant visual impairment.

Participants will be randomised in a 1:1 ratio between standard post-operative care and the intervention – use of the smartphone tool in addition to standard post-operative care. The main outcome measure will be time-to-diagnosis of SSI with secondary outcome measures considering use of Emergency Department (ED) and General Practitioner (GP) services and patient experience. Follow-up will be conducted by clinicians blinded to group allocation. Analysis of time-to-diagnosis will be by comparison of means using an independent 2 sample t-test.

## **Ethics and Dissemination**

This is the first randomised controlled trial on the use of a smartphone-delivered wound assessment tool to facilitate the assessment of surgical site infection and the impact on time-to-diagnosis. The intervention is being used in addition to standard post-operative care. The study design and protocol were reviewed and approved by Southeast Scotland

1  
2 Research and Ethics Committee (REC Ref: 16/SS/0072 24/05/2016). Study findings will be  
3  
4 presented at academic conferences, published in peer-reviewed journals, and are expected  
5  
6 in 2020. A written lay summary will be available to study participants on request.  
7  
8

## 9 **Trial Registration**

10  
11  
12 *ClinicalTrials.gov*. Reference No: NCT02704897  
13  
14  
15  
16  
17  
18  
19  
20  
21  
22  
23  
24  
25  
26  
27  
28  
29  
30  
31  
32  
33  
34  
35  
36  
37  
38  
39  
40  
41  
42  
43  
44  
45  
46  
47  
48  
49  
50  
51  
52  
53  
54  
55  
56  
57  
58  
59  
60

## Strengths and Limitations of this Study:

- This is the first randomised controlled trial on the use of a smartphone-delivered wound assessment tool to facilitate the assessment of surgical site infection and the impact on time-to-diagnosis.
- There are broad eligibility criteria, and so it is expected the results will be generalisable to a wide population of patients undergoing abdominal surgery.
- Due to the nature of the intervention, only clinicians undertaking follow-up can be blinded to randomisation status.
- All patients will receive 30-day telephone or face-to-face follow-up to determine the occurrence of surgical site infections, however the gold-standard for diagnosis remains direct clinical assessment.
- Data on patient experience and acceptability of smartphone-delivered follow-up will be collected concurrently to guide future implementation of future telehealth interventions.

review only

## Introduction

Surgical site infection (SSI) complicates 2-10% of general surgical cases, with the highest rates of infection seen after colorectal surgery<sup>1</sup>. Infection and re-admission rates have not significantly changed in the last 10 years. The most common causative group is *Enterobacteriaceae* (25% of cases), with *Staph. Aureus* (10%) and MRSA (3%) accounting for a small proportion of overall cases<sup>1</sup>. National surveillance data from Scotland indicate that peak incidence of infection is between day 6-12 post-operatively<sup>2</sup>.

A recent study indicated that national reports may underestimate the true incidence of SSI, and suggested that patient reported SSI is a more sensitive measure<sup>3</sup>. Unpublished data from our own hospital indicates that up to 25% of patients report post-operative wound infections; approximately half of these require assessment by the surgical team, but less than 1% require admission. Many of these patients had already consulted their General Practitioner (GP) or attended the Emergency Department (ED). In addition, many patients have concerns about their wounds (in the absence of infection) and may experience delays in accessing appropriate medical assessment. Thus, SSI represents a significant burden on healthcare services, in a patient group who are predominantly appropriate for outpatient management.

There is currently an increased research focus on digital health: the use of communications technology to enhance healthcare, public health and delivery of health education<sup>4</sup>. There are several advantages to this approach, in particular the potential to improve access to care, and help streamline usage of emergency services. Indeed, there is evidence that these technologies have been used to improve outcome<sup>5</sup>, as well as to reduce specialist workload<sup>6</sup> and ED attendances<sup>7</sup>. In addition, the increasing use of healthcare technology is

1 likely to help improve automatic data collection and recording, which may be used to  
2  
3 identify areas for future research and drive quality improvement<sup>4</sup>.  
4  
5  
6  
7

8 Over three-quarters (78%) of UK adults now own smartphones<sup>8</sup>, with at least a third using  
9 a smartphone as their primary device to access the internet<sup>4</sup>. Therefore, there is vast  
10 potential for the use of smartphones in digital health, with a growing literature on the use in  
11 the context of postoperative community follow-up<sup>9 10</sup>. Given the frequency with which  
12 patients report post-operative wound complications and the high incidence of SSI, this has  
13 become a research focus in telemedicine for postoperative care<sup>11 12</sup>. We aim to investigate  
14 if an online wound assessment tool can be used to help diagnose SSI and improve patient  
15 access to care and clinical assessment. In addition, we aim to investigate if this results in  
16 earlier intervention to treat SSI and a decreased attendance at ED and GPs. The  
17 widespread use of smartphones, the integrated nature of their technology, and their  
18 portability means smartphones represent the best platform to deliver this tool, with the aim  
19 of facilitating rapid access to clinical care.  
20  
21  
22  
23  
24  
25  
26  
27  
28  
29  
30  
31  
32  
33  
34  
35  
36

### 37 **Objectives**

38 This randomised-controlled trial will investigate whether a smartphone-delivered wound  
39 assessment tool can be used in the diagnosis of SSI and result in earlier treatment. It will  
40 also assess for a reduction in ED and GP attendances as a result of using the intervention.  
41 Data on patient experience will be used to evaluate perceived utility of the tool.  
42  
43  
44  
45  
46  
47  
48  
49  
50  
51  
52  
53  
54  
55  
56  
57  
58  
59  
60

## Methods and Analysis

### Overview

This is a superiority randomised-controlled trial, using a parallel two-arm design (Figure 1).

Once consent is obtained, participants will be randomised in a 1:1 ratio to either the intervention arm (receiving standard post-operative care plus access to the smartphone-delivered wound assessment tool), or the control arm (standard post-operative care).

Patients will be recruited from the emergency surgery inpatient service across NHS Lothian.

The trial period will be 30 days. An internal pilot study in the first 80 patients recruited will be conducted to ensure the trial design is practical and deliverable. Following assessment of pilot data, there will be an opportunity to adapt the trial design in response to the pilot study findings. Participants will be followed-up by a researcher blinded to the intervention status.

The primary outcome measure will be the number of days from surgery to diagnosis of SSI (time-to-diagnosis), with ED and GP service use as a secondary outcome measure.

Additional data regarding patient experience will also be collected from patients in both arms of the trial via a smartphone-delivered questionnaire at 30 days.

### Research Setting

This research is being carried out in a large health board, serving a mixed urban and rural population of over 800,000. The emergency surgery service admits 300 patients per week between participating sites and performs 2500 procedures annually.

### Participants

Emergency surgery inpatients who are adults (over age 16) and have undergone abdominal surgery (on the same admission as diagnosis) will be screened for eligibility. Potentially eligible patients will be screened and documented as (a) eligible and included, (b) eligible and missed, (c) eligible and declined (iv) ineligible (visual impairment) (v) ineligible (no smartphone). Written consent will be obtained by the research team in line with Good

1  
2 Clinical Practice Guidance. Participation is voluntary and a patient's decision regarding  
3 participation will not affect any aspect of their care in the case of refusal. Participants will  
4 have the right to withdraw from the study at any point.  
5  
6  
7  
8  
9

### 10 11 ***Inclusion Criteria***

12 Patients admitted to the emergency surgery inpatient service who meet the following criteria  
13 will be included in the study:  
14  
15

- 16 • Emergency surgery inpatients who have undergone abdominal surgery;
  - 17 • Owners of a smartphone, with access to internet;
  - 18 • Adults over the age over 16;
  - 19 • Able to give informed consent.
- 20  
21  
22  
23  
24  
25  
26  
27  
28  
29  
30

### 31 ***Exclusion Criteria***

32 Any patients with significant visual impairment preventing use of the online questionnaire  
33 will be excluded from the study (defined by self-reporting of the patient)  
34  
35  
36  
37  
38  
39

### 40 ***Study Procedures***

#### 41 **Recruitment**

42 The clinical team will inform potentially eligible patients about the on-going trial, and offer  
43 them further information (written and verbal from the research team). Eligible patients will  
44 be recruited postoperatively as inpatients, with formal written consent taken by a member of  
45 the research team. Baseline information gathered will include: reason for admission, index  
46 procedure and date, significant co-morbidities – including history of diabetes or  
47 immunosuppression, as well as age and BMI. Participant contact details (mobile telephone  
48 number) will be entered into a secure, online data collection tool (Research Electronic Data  
49 Capture (REDCap) database) <sup>13</sup>.  
50  
51  
52  
53  
54  
55  
56  
57  
58  
59  
60

## Randomisation and Blinding

Participants will be assigned in a 1:1 ratio to the intervention or control arms and provided with the appropriate information packs prior to discharge. Simple randomization will be carried out using REDCap<sup>13</sup>, utilising a computer-generated random number sequence. The emergency surgery nurses (who will provide care to patients as required during the trial), and those taking consent (which may include medical students and qualified clinicians) will not be blinded. The clinicians undertaking follow-up will be blinded to status. A trial entry will be made in the clinical notes, including contact details for the trial team should a member of the clinical team require more information or wish to discover their trial status.

## Intervention

### Smartphone-Delivered Wound Assessment Tool

A wound-based instrument to detect potential wound infection was developed. Our smartphone-delivered wound assessment model was based on the Centre for Disease Control and Prevention (CDC) classification criteria, and the ASEPSIS model (Additional treatment, Serous discharge, Erythema, Purulent exudate, and Separation of the deep tissues, the Isolation of bacteria, and the duration of Inpatient Stay).<sup>14 15</sup> It detects symptoms of SSI and symptoms of systemic illness as a result of this, whilst being quick and simple to use (Table 1).

Participants will have access to the smartphone-delivered wound assessment tool on discharge via a link sent by short-messaging system (SMS) to their smartphones. If at any time they have concerns about their wound, they can access the tool, and will be advised based on their responses. When a patient response is submitted, the research team will be automatically notified, and prompted to reply (Figure 2).



1  
2 In addition, a link to the smartphone-delivered wound assessment tool will be sent on days  
3  
4 3, 7, and 15 post-operatively. These time-points have been selected to include peak  
5  
6 incidence of infection and cover the time-course of wound healing. This will ensure the  
7  
8 collection of negative data in those without symptoms and will therefore assist in  
9  
10 determining the specificity of the tool. If participants do not respond they will be sent a  
11  
12 single reminder at these time-points.  
13  
14  
15  
16  
17  
18

### 19 **Wound Photographs**

20 Participants will be asked to upload at least one photograph of their wound each time they  
21  
22 use the smartphone-delivered wound assessment tool. These will be reviewed by a clinical  
23  
24 researcher and assigned into one of 3 categories: no concerns, medium-risk, high-risk.  
25  
26 Further machine learning-based assessment of wound photographs will be investigated.  
27  
28  
29  
30  
31  
32

### 33 **Responses**

34 An experienced clinician (surgical registrar or consultant) will review all participant  
35  
36 responses and photographs in real-time. Based on the response and the wound  
37  
38 photographs, they will contact the patient by SMS with advice regarding the need for further  
39  
40 assessment. The clinician will classify participants into 3 groups: no concern, medium-risk,  
41  
42 high-risk. These three groups were agreed collectively by the researchers in collaboration  
43  
44 with the emergency surgical team. Three potential outcomes were identified: (i) the patient  
45  
46 does not require further assessment (no concern), (ii) the patient requires further  
47  
48 assessment, but the symptoms identified suggest a mild infection (medium-risk), (iii) the  
49  
50 symptoms suggest a potentially severe infection requiring urgent assessment (high-risk).  
51  
52 The wound photographs will also be reviewed by the experienced clinician where available  
53  
54 and classified into the same 3 groups. This may be used by the researcher to refine their  
55  
56 response to the tool, if they consider this necessary.  
57  
58  
59  
60

## Algorithm

An algorithm has been designed to classify participant responses into the same 3 categories listed above (Table 1). This will be run on all participant responses (but will not impact on care), and will be compared with clinician rating, as a secondary sub-study. The correlation between clinician response, algorithm response and photo response will be used to determine if the algorithm can be used to assess for SSI independent of the responsible doctor.

## Action from Response

Participants whose responses raise no concerns will be advised of this. Participants who report symptoms consistent with wound infection will be directed for further assessment. Those in the medium-risk group will be directed to community care whilst those in the high-risk group will be advised to return for assessment at the centre where they had their procedure. This advice aligns to the degree of concern identified above.

## Wound Reviews

For those in the intervention group who are identified as high-risk, the emergency surgery nurses will collect a wound swab from the patient to test for causative organisms (and aid in confirming infection). If a wound infection is diagnosed clinically, the patient will be started with antibiotics in line with local guidelines. This will be logged in the patient's trial record. If any patients in the control group attend the emergency surgery service for a review the same procedures will apply.

GPs will be informed about their patient's participation in the trial. We will request that if a participant enrolled in the trial visits their GP a wound swab is taken, and that they are

1 treated in line with the GP's normal practice. This will also apply to those in the medium-risk  
2  
3  
4 group who will be directed to their GP.  
5  
6  
7

8 All participants will be given a log to take to any wound reviews, and wound swabs may be  
9  
10 taken of wound discharge or the wound bed as appropriate. If an infection is diagnosed the  
11  
12 date treatment is commenced will be noted, alongside any intervention performed. This will  
13  
14 then be returned to the trial team, and used in follow-up.  
15  
16  
17

### 21 **30 Day Follow-up**

22 Both arms will receive a follow-up face-to-face or telephone consultation 30 days post-  
23  
24 operatively (alternatively, written follow-up is also available for those with significant hearing  
25  
26 impairment). This consultation will follow a standardized format and will be conducted with  
27  
28 an independent clinical researcher blinded to the intervention status. The clinical researcher  
29  
30 will gather data on post-operative course, any symptoms related to the wound, and any  
31  
32 treatment offered. They will also have access to electronic patient record (including all  
33  
34 microbiology results from swabs taken in the community or hospital) and any wound logs  
35  
36 returned. On the basis of these three sources of information, two independent, blinded  
37  
38 clinical researchers will determine if an infection has been present (trained using the CDC  
39  
40 Criteria to diagnose infection).<sup>14</sup> Data on patient experience and service usage – ED and  
41  
42 GP attendances, as well as contact with emergency surgery nurses – will also be collected  
43  
44 via a separate questionnaire delivered alongside the 30 day follow-up (Table 2).  
45  
46  
47  
48  
49  
50

### 51 **Data Analysis Plan**

52 All analysis will be carried out on an intention-to-treat basis. We do not anticipate missing  
53  
54 data in patient demographics. However, any missing data values will be handled using  
55  
56 multiple imputation. The volume of missing outcome data will be recorded for the control  
57  
58  
59  
60

1 and intervention arms, and any differences in drop-out rate noted. Thereafter patients with  
2 missing outcome data will be excluded from analysis.  
3  
4  
5  
6  
7  
8

## 9 **Outcome Measures**

10 This is a superiority RCT, and the primary outcome will be mean time from operation to  
11 diagnosis (time-to-diagnosis) of SSI. This outcome has been chosen (rather than time from  
12 symptom onset), as it can be more accurately recorded and is a measure of improved  
13 access to care. We assume an equal incidence of SSI in both groups and will ensure this  
14 using odds ratios. Time-to-diagnosis will also be compared using Cox proportional hazard  
15 regression analysis, a *P* value of <0.05 will be considered statistically significant.  
16  
17  
18  
19  
20  
21  
22  
23  
24  
25  
26  
27

28 For the intervention, we will calculate the sensitivity and specificity of the researcher  
29 response, the algorithm response, and photograph response in the diagnosis of SSI. We  
30 will compare the correlation of the algorithm, which is based on questionnaire responses,  
31 with clinician advice and eventual diagnosis. Correlation analysis will be performed using  
32 Kendall tau rank test. This will assess the accuracy of the algorithm in stratifying risk, as  
33 compared to a clinician, and will indicate what additional benefit may be gained from  
34 photographic analysis.  
35  
36  
37  
38  
39  
40  
41  
42  
43  
44  
45  
46

47 The secondary outcome measure will be use of services: GP and ED attendances, as well  
48 as contact with emergency surgery nurses. This data will be gathered at 30 days.  
49

50 Differences in number of attendees to GP and ED will be compared using a  $\chi^2$  test.

51 Differences in the number of attendances will be assessed using the Mann-Whitney U-test.

52 Data on patient experience will also be gathered via a follow-up questionnaire and analysed  
53 separately (Table 2). This will help determine if an online questionnaire delivered via a  
54  
55  
56  
57  
58  
59  
60

1  
2 smartphone has a positive impact on patient experience of care, and if it helped facilitate  
3  
4 their access to care.  
5  
6  
7  
8  
9

## 10 **Sample Size and Power Analysis**

11 Our primary outcome measure is time-to-diagnosis and we aim to detect a one-day  
12  
13 difference with a power of 90% (alpha 0.05). Assuming a standard deviation of 1 day in  
14  
15 time-to-diagnosis, 22 wound infections per group will be required. Estimating a 10% rate of  
16  
17 wound infection (in line with National Data)<sup>2</sup> and a drop-out rate of 10%, a sample size of  
18  
19 490 will be required (recruitment target 500 patients). Analyses will be intention-to-treat.  
20  
21  
22  
23  
24

25 Assuming that 50 operations are performed per week and two thirds of these patients are  
26  
27 likely to own smartphones, we estimate there will be 30 potentially eligible patients per  
28  
29 week. Aiming for recruitment of 25% of eligible patients, we estimate a continuous  
30  
31 recruitment time of 16 months. This rate of recruitment will also enable the researcher to  
32  
33 respond to all patient concerns in a timely manner.  
34  
35  
36  
37  
38  
39

## 40 **Ethics and dissemination:**

### 41 **Safety**

42 All participants will receive the normal standard of care. The smartphone-based intervention  
43  
44 is in addition to the normal standard of care. If at any point participants have any concerns.  
45  
46 they will be advised to contact the emergency surgery nurses regarding their care (in line  
47  
48 with normal standard of care). Out-of-hours they will be advised to contact NHS out-of-  
49  
50 hours services. Participants will be advised to contact the emergency surgery nurses if they  
51  
52 have any concerns whilst they are awaiting a response to the tool. The research team will  
53  
54 be notified automatically that a participant is awaiting a response, ensuring that in normal  
55  
56 working hours patients receive a rapid reply. They will also be advised that if they access  
57  
58  
59  
60

1 the tool at night, that it will not be reviewed until the following day. They will be advised to  
2 contact out-of-hours services if they require an overnight assessment. These actions will  
3 prevent any harm to patients resulting from a delayed response to the wound assessment  
4 tool. A potential consequence of closer follow-up of these postoperative patients could be  
5 increased identification of superficial SSI which would likely otherwise self-resolve, however  
6 this would closer surveillance or treatment if appropriate (this decision is made by an  
7 independent clinician at the time of review). Due to the low-risk nature of the trial, a formal  
8 data-monitoring committee has not been nominated.

### ***Data Protection and Management***

9 All participant data will be stored securely in a REDCap<sup>13</sup> database that has controlled  
10 access and is password protected. This data will be anonymised, and only available to  
11 researchers listed on the protocol. Participant responses to the questionnaire will be  
12 reported directly to the REDCap database and will not be stored on patient phones.  
13 However, patients will be advised to review the security setting on their phone if they intend  
14 to store their wound photographs. Patient details will be recorded in a trial log should any  
15 safety concerns arise necessitating they be contacted.

### ***Ethical Approval and Dissemination Plan***

16 The study design and protocol were reviewed and approved by Southeast Scotland  
17 Research and Ethics Committee (REC Ref: 16/SS/0072 24/05/2016), and any protocol  
18 amendments will be resubmitted for review. The study is sponsored by ACCORD, a  
19 collaboration between the University of Edinburgh and NHS Lothian Research and  
20 Development. In line with Good Clinical Practice Guidance, written consent will be obtained  
21 by appropriately trained medical students or clinicians. Participation is voluntary and a

1 patient's decision regarding participation will not affect any aspect of their care in the case  
2  
3  
4 of refusal. Participants will have the right to withdraw from the study at any point.  
5  
6  
7

8 Authorship on any papers derived from the study will be all authors involved in study design  
9  
10 and protocol development, and any additional researchers involved in the writing group.  
11  
12

13 Furthermore, patient recruiters who have recruited more than the prespecified 15 patients  
14  
15 to the study will be listed as a "collaborator". All other persons involved in the study will be  
16  
17 listed in the acknowledgements.  
18  
19

20  
21  
22 There are no financial and other competing interests for principal investigators for the  
23  
24 overall trial or either study site. Study findings will be reported in line with CONSORT  
25  
26 guidelines, and disseminated in the printed media, and learned forums, and are expected in  
27  
28 2020. A written lay summary will be available to study participants on request.  
29  
30  
31

### 32 ***Patient and Public Involvement***

33  
34 Patients were not directly involved in the design or delivery of this trial, however data on  
35  
36 patient experience in using the smartphone tool will be evaluated via a follow-up  
37  
38 questionnaire. This will inform future development and dissemination of this intervention. A  
39  
40 summary of results will be provided to all patients involved once the trial has been  
41  
42 completed and analysed.  
43  
44  
45  
46  
47  
48  
49  
50  
51  
52  
53  
54  
55  
56  
57  
58  
59  
60

## Authors' Contributions

(1) Conception and design: KEM, CAS, TMD, KAM, RO, AS, RS, MP, SJW, EH. (2) Drafting the manuscript: KAM, KEM, CAS, TMD, RO, SRK, CJF, AS. (4) Critical revision of the manuscript for scientific and factual content: KAM, KEM, CAS, TMD, RO, SRK, CJF, AS, RS, MP, SJW, EH. Supervision: RS, MP, SJW, EH. All authors read and approved the final manuscript.

## Funding

This research received no specific grant from any funding agency in the public, commercial or not-for-profit sectors.

## Competing interests

The authors do not have any conflicts of interest to declare.

**Word Count: 3,158**

**Figure 1:** Schema of trial events for intervention and control arms.

**Figure 2:** Handling of wound questionnaire submissions.



## Tables:

**Table 1:** Questions included in smartphone-delivered questionnaire and independent algorithm scoring system.

| Smartphone-delivered wound assessment                                                                    |                                                                                                                              | Algorithm scoring system |                                |                                |
|----------------------------------------------------------------------------------------------------------|------------------------------------------------------------------------------------------------------------------------------|--------------------------|--------------------------------|--------------------------------|
| Question                                                                                                 | Response (score)                                                                                                             | Low-risk                 | Medium-Risk                    | High-risk                      |
| Is the pain worse than immediately after the operation?                                                  | No (0), Yes (1)                                                                                                              | Inflammation<br>Score 0  | Inflammation<br>Score $\leq 2$ | Inflammation<br>Score $\geq 3$ |
| Is there new redness around your wound site excluding the wound itself?                                  | No (0), Yes (1)                                                                                                              |                          |                                |                                |
| Is there more swelling around your wound site than at the time of surgery?                               | No (0), Yes (1)                                                                                                              |                          |                                |                                |
| Are you experiencing a new burning sensation or heat at the wound site?                                  | No (0), Yes (1)                                                                                                              |                          |                                |                                |
|                                                                                                          |                                                                                                                              | <b>AND</b>               | <b>AND</b>                     | <b>OR</b>                      |
| Is there liquid coming from the wound site? If so, please select which option best describes the liquid. | No (0),<br>Yes – clear (1),<br>Yes – bloody (1),<br>Yes – yellowish (1),<br>Yes – thick/yellow (2),<br>Yes – green/brown (2) | Discharge<br>Score 0     | Discharge<br>Score $\leq 1$    | Discharge<br>Score 2           |
| Is your wound opening or gaping?                                                                         | No, Yes                                                                                                                      | Not scored in algorithm  |                                |                                |
| Have you experienced fevers in the last 24 hours?                                                        | No, Yes                                                                                                                      |                          |                                |                                |
| Please upload a photograph of your wound.                                                                | Photograph                                                                                                                   | Not scored in algorithm  |                                |                                |

**Table 2:** Questions included in smartphone-delivered 30-day patient experience questionnaire.

| Smartphone-delivered 30-day patient experience questionnaire                                                       |                                                                           |
|--------------------------------------------------------------------------------------------------------------------|---------------------------------------------------------------------------|
| Question                                                                                                           | Available responses                                                       |
| 1. Did you have access to the smartphone tool?                                                                     | Yes, No                                                                   |
| 2. If you had access to the tool, how many times did you use the tool (not including the reminder questions sent)? | [integer]                                                                 |
| 3. If you had access to the tool, please rate the extent to which you agree/disagree with the statements below:    |                                                                           |
| a. The tool was easy to use                                                                                        | Strongly Disagree, Disagree, Neutral / No opinion, Agree, Strongly Agree. |
| b. I understood the questions in the tool                                                                          |                                                                           |
| c. It was easy to upload my wound photo                                                                            |                                                                           |
| d. The response from the tool was helpful                                                                          |                                                                           |
| 4. Please rate the extent to which you agree/disagree with the statements below:                                   |                                                                           |
| a. It was easy to get hold of advice about my wound when needed                                                    | Strongly Disagree, Disagree, Neutral / No opinion, Agree, Strongly Agree. |
| b. I had to wait more than 1 day for advice about my wound                                                         |                                                                           |
| c. The advice I received about my wound was useful                                                                 |                                                                           |

## References:

1. Public Health England. Surgical site infection surveillance service (SSISS). 2014
2. Health Protection Scotland (HPS). Scottish surveillance of healthcare associated infection Programme (SSHAIP). 2012
3. Pham JC, Ashton MJ, Kimata C, et al. Surgical site infection: Comparing surgeon versus patient self-report. *Journal of Surgical Research* 2016;202(1):95-102.
4. Imison C, Castle-Clarke S, Watson R, et al. Delivering the benefits of digital health care research summary, 2016.
5. Zhou YY, Kanter MH, Wang JJ, et al. Improved quality at Kaiser Permanente through e-mail between physicians and patients. *Health Affairs* 2010;29(7):1370-75.
6. Caffery L, Smith A. A Literature Review of Email-based Telemedicine. *Studies in Health Technology and Informatics* 2010;161:20-34.
7. Hex N, Tuggey J, Wright D, et al. Telemedicine in care homes in Airedale, Wharfedale and craven. *Clinical Governance: An International Journal* 2015;20(3):146-54.

- 1  
2 8. Office of Communications (OFCOM). Communications Market Report 2018. London:  
3 OFCOM, 2019.
- 4  
5 9. Armstrong KA, Coyte PC, Brown M, et al. Effect of Home Monitoring via Mobile App on  
6 the Number of In-Person Visits Following Ambulatory Surgery: A Randomized Clinical  
7 Trial Monitoring via Mobile App and In-Person Visits After Ambulatory Surgery. *JAMA*  
8 *Surgery* 2017;152(7):622-27.
- 9  
10 10. Gunter RL, Chouinard S, Fernandes-Taylor S, et al. Current Use of Telemedicine for  
11 Post-Discharge Surgical Care: A Systematic Review. *Journal of the American College*  
12 *of Surgeons* 2016;222(5):915-27.
- 13  
14 11. Gunter RL, Fernandes-Taylor S, Rahman S, et al. Feasibility of an Image-Based Mobile  
15 Health Protocol for Postoperative Wound Monitoring. *Journal of the American College*  
16 *of Surgeons* 2018;226(3):277-86.
- 17  
18 12. Kummerow Broman K, Gaskill CE, Faqih A, et al. Evaluation of Wound Photography for  
19 Remote Postoperative Assessment of Surgical Site Infections. *JAMA Surgery*  
20 2019;154(2):117-24.
- 21  
22 13. Harris PA, Taylor R, Thielke R, et al. Research electronic data capture (REDCap)—A  
23 metadata-driven methodology and workflow process for providing translational research  
24 informatics support. *Journal of Biomedical Informatics* 2009;42(2):377-81.
- 25  
26 14. Centre for Disease Control and Prevention (CDC) National Healthcare Safety Network  
27 (NHSN). Patient Safety Component (PSC) Manual Chapter 9: Surgical site infection  
28 (SSI) event. In: CDC, ed. Atlanta: CDC, 2016.
- 29  
30 15. Wilson APR, Sturridge MF, Treasure T, et al. A scoring method (ASEPSIS) for  
31 postoperative wound infections for use in clinical trials of antibiotic prophylaxis. *The*  
32 *Lancet* 1986;327(8476):311-12.
- 33  
34  
35  
36  
37  
38  
39  
40  
41  
42  
43  
44  
45  
46  
47  
48  
49  
50  
51  
52  
53  
54  
55  
56  
57  
58  
59  
60

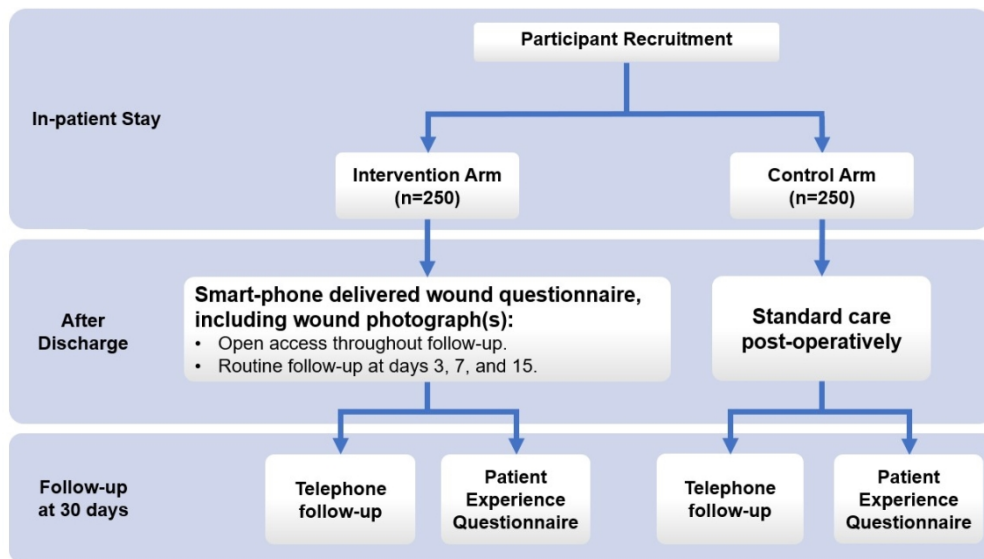

Figure 1: Schema of trial events for intervention and control arms

812x453mm (120 x 120 DPI)

1  
2  
3  
4  
5  
6  
7  
8  
9  
10  
11  
12  
13  
14  
15  
16  
17  
18  
19  
20  
21  
22  
23  
24  
25  
26  
27  
28  
29  
30  
31  
32  
33  
34  
35  
36  
37  
38  
39  
40  
41  
42  
43  
44  
45  
46  
47  
48  
49  
50  
51  
52  
53  
54  
55  
56  
57  
58  
59  
60



Figure 2: Handling of wound questionnaire submissions

811x454mm (120 x 120 DPI)



SPIRIT 2013 Checklist: Recommended items to address in a clinical trial protocol and related documents\*

| Section/item                      | Item No | Description                                                                                                                                                                                                                                                                                                                                                                |
|-----------------------------------|---------|----------------------------------------------------------------------------------------------------------------------------------------------------------------------------------------------------------------------------------------------------------------------------------------------------------------------------------------------------------------------------|
| <b>Administrative information</b> |         |                                                                                                                                                                                                                                                                                                                                                                            |
| Title                             | 1       | Descriptive title identifying the study design, population, interventions, and, if applicable, trial acronym<br><br><b>Can a smartphone-delivered tool facilitate the assessment of surgical site infection and result in earlier treatment? Tracking Wound Infection with Smartphone Technology (TWIST): a randomized-controlled trial in emergency surgery patients.</b> |
| Trial registration                | 2a      | Trial identifier and registry name. If not yet registered, name of intended registry.<br><b>ClinicalTrials.gov. Reference No: NCT02704897</b>                                                                                                                                                                                                                              |
|                                   | 2b      | All items from the World Health Organization Trial Registration Data Set<br><b>ClinicalTrials.gov. Reference No: NCT02704897</b>                                                                                                                                                                                                                                           |
| Protocol version                  | 3       | Date and version identifier<br><b>Page 1</b>                                                                                                                                                                                                                                                                                                                               |
| Funding                           | 4       | Sources and types of financial, material, and other support<br><b>Page 1</b>                                                                                                                                                                                                                                                                                               |
| Roles and responsibilities        | 5a      | Names, affiliations, and roles of protocol contributors<br><b>Page 1</b>                                                                                                                                                                                                                                                                                                   |
|                                   | 5b      | Name and contact information for the trial sponsor<br><b>Page 1</b>                                                                                                                                                                                                                                                                                                        |
|                                   | 5c      | Role of study sponsor and funders, if any, in study design; collection, management, analysis, and interpretation of data; writing of the report; and the decision to submit the report for publication, including whether they will have ultimate authority over any of these activities<br><b>Page 1</b>                                                                  |

- 1  
2  
3  
4  
5  
6  
7  
8  
9
- 5d Composition, roles, and responsibilities of the coordinating centre, steering committee, endpoint adjudication committee, data management team, and other individuals or groups overseeing the trial, if applicable (see Item 21a for data monitoring committee)  
**Page 1**

## Introduction

- 10  
11  
12  
13  
14  
15  
16  
17  
18  
19  
20  
21  
22  
23  
24  
25  
26  
27  
28
- Background and rationale 6a Description of research question and justification for undertaking the trial, including summary of relevant studies (published and unpublished) examining benefits and harms for each intervention  
**Page 5-6**
- 6b Explanation for choice of comparators  
**Page 5-6**
- Objectives 7 Specific objectives or hypotheses  
**Page 7**
- Trial design 8 Description of trial design including type of trial (eg, parallel group, crossover, factorial, single group), allocation ratio, and framework (eg, superiority, equivalence, noninferiority, exploratory)  
**Page 8 (overview)**

## Methods: Participants, interventions, and outcomes

- 29  
30  
31  
32  
33  
34  
35  
36  
37  
38  
39  
40  
41  
42  
43  
44  
45  
46  
47  
48  
49  
50  
51  
52  
53  
54  
55  
56  
57  
58  
59  
60
- Study setting 9 Description of study settings (eg, community clinic, academic hospital) and list of countries where data will be collected. Reference to where list of study sites can be obtained  
**Page 8 (research setting)**
- Eligibility criteria 10 Inclusion and exclusion criteria for participants. If applicable, eligibility criteria for study centres and individuals who will perform the interventions (eg, surgeons, psychotherapists)  
**Page 8-9 (Patients, inclusion criteria, exclusion criteria)**
- Interventions 11a Interventions for each group with sufficient detail to allow replication, including how and when they will be administered.  
**Page 10-13**
- 11b Criteria for discontinuing or modifying allocated interventions for a given trial participant (eg, drug dose change in response to harms, participant request, or improving/worsening disease).  
**Page 17**
- 11c Strategies to improve adherence to intervention protocols, and any procedures for monitoring adherence (eg, drug tablet return, laboratory tests).  
**N/A**

|    |                      |     |                                                                                                                                                                                                                                                                                                                                                                                |
|----|----------------------|-----|--------------------------------------------------------------------------------------------------------------------------------------------------------------------------------------------------------------------------------------------------------------------------------------------------------------------------------------------------------------------------------|
| 1  |                      |     |                                                                                                                                                                                                                                                                                                                                                                                |
| 2  |                      | 11d | Relevant concomitant care and interventions that are permitted or prohibited during the trial                                                                                                                                                                                                                                                                                  |
| 3  |                      |     | <b>N/A</b>                                                                                                                                                                                                                                                                                                                                                                     |
| 4  |                      |     |                                                                                                                                                                                                                                                                                                                                                                                |
| 5  |                      |     |                                                                                                                                                                                                                                                                                                                                                                                |
| 6  | Outcomes             | 12  | Primary, secondary, and other outcomes, including the specific measurement variable (eg, systolic blood pressure), analysis metric (eg, change from baseline, final value, time to event), method of aggregation (eg, median, proportion), and time point for each outcome. Explanation of the clinical relevance of chosen efficacy and harm outcomes is strongly recommended |
| 7  |                      |     | <b>Page 14 (outcome measures)</b>                                                                                                                                                                                                                                                                                                                                              |
| 8  |                      |     |                                                                                                                                                                                                                                                                                                                                                                                |
| 9  |                      |     |                                                                                                                                                                                                                                                                                                                                                                                |
| 10 |                      |     |                                                                                                                                                                                                                                                                                                                                                                                |
| 11 |                      |     |                                                                                                                                                                                                                                                                                                                                                                                |
| 12 |                      |     |                                                                                                                                                                                                                                                                                                                                                                                |
| 13 |                      |     |                                                                                                                                                                                                                                                                                                                                                                                |
| 14 |                      |     |                                                                                                                                                                                                                                                                                                                                                                                |
| 15 | Participant timeline | 13  | Time schedule of enrolment, interventions (including any run-ins and washouts), assessments, and visits for participants. A schematic diagram is highly recommended (see Figure)                                                                                                                                                                                               |
| 16 |                      |     | <b>Figure 1</b>                                                                                                                                                                                                                                                                                                                                                                |
| 17 |                      |     |                                                                                                                                                                                                                                                                                                                                                                                |
| 18 |                      |     |                                                                                                                                                                                                                                                                                                                                                                                |
| 19 |                      |     |                                                                                                                                                                                                                                                                                                                                                                                |
| 20 |                      |     |                                                                                                                                                                                                                                                                                                                                                                                |
| 21 | Sample size          | 14  | Estimated number of participants needed to achieve study objectives and how it was determined, including clinical and statistical assumptions supporting any sample size calculations                                                                                                                                                                                          |
| 22 |                      |     | <b>Page 15 (Sample Size and Power Analysis).</b>                                                                                                                                                                                                                                                                                                                               |
| 23 |                      |     |                                                                                                                                                                                                                                                                                                                                                                                |
| 24 |                      |     |                                                                                                                                                                                                                                                                                                                                                                                |
| 25 |                      |     |                                                                                                                                                                                                                                                                                                                                                                                |
| 26 |                      |     |                                                                                                                                                                                                                                                                                                                                                                                |
| 27 | Recruitment          | 15  | Strategies for achieving adequate participant enrolment to reach target sample size.                                                                                                                                                                                                                                                                                           |
| 28 |                      |     | <b>Page 9 (Recruitment)</b>                                                                                                                                                                                                                                                                                                                                                    |
| 29 |                      |     |                                                                                                                                                                                                                                                                                                                                                                                |
| 30 |                      |     |                                                                                                                                                                                                                                                                                                                                                                                |

### Methods: Assignment of interventions (for controlled trials)

#### Allocation:

|    |                                  |     |                                                                                                                                                                                                                                                                                                                                                          |
|----|----------------------------------|-----|----------------------------------------------------------------------------------------------------------------------------------------------------------------------------------------------------------------------------------------------------------------------------------------------------------------------------------------------------------|
| 31 |                                  |     |                                                                                                                                                                                                                                                                                                                                                          |
| 32 |                                  |     |                                                                                                                                                                                                                                                                                                                                                          |
| 33 |                                  |     |                                                                                                                                                                                                                                                                                                                                                          |
| 34 |                                  |     |                                                                                                                                                                                                                                                                                                                                                          |
| 35 | Sequence generation              | 16a | Method of generating the allocation sequence (eg, computer-generated random numbers), and list of any factors for stratification. To reduce predictability of a random sequence, details of any planned restriction (eg, blocking) should be provided in a separate document that is unavailable to those who enrol participants or assign interventions |
| 36 |                                  |     | <b>Page 10 (Randomisation and Blinding).</b>                                                                                                                                                                                                                                                                                                             |
| 37 |                                  |     |                                                                                                                                                                                                                                                                                                                                                          |
| 38 |                                  |     |                                                                                                                                                                                                                                                                                                                                                          |
| 39 |                                  |     |                                                                                                                                                                                                                                                                                                                                                          |
| 40 |                                  |     |                                                                                                                                                                                                                                                                                                                                                          |
| 41 |                                  |     |                                                                                                                                                                                                                                                                                                                                                          |
| 42 |                                  |     |                                                                                                                                                                                                                                                                                                                                                          |
| 43 |                                  |     |                                                                                                                                                                                                                                                                                                                                                          |
| 44 |                                  |     |                                                                                                                                                                                                                                                                                                                                                          |
| 45 | Allocation concealment mechanism | 16b | Mechanism of implementing the allocation sequence (eg, central telephone; sequentially numbered, opaque, sealed envelopes), describing any steps to conceal the sequence until interventions are assigned                                                                                                                                                |
| 46 |                                  |     | <b>Page 10 (Randomisation and Blinding).</b>                                                                                                                                                                                                                                                                                                             |
| 47 |                                  |     |                                                                                                                                                                                                                                                                                                                                                          |
| 48 |                                  |     |                                                                                                                                                                                                                                                                                                                                                          |
| 49 |                                  |     |                                                                                                                                                                                                                                                                                                                                                          |
| 50 |                                  |     |                                                                                                                                                                                                                                                                                                                                                          |
| 51 |                                  |     |                                                                                                                                                                                                                                                                                                                                                          |
| 52 | Implementation                   | 16c | Who will generate the allocation sequence, who will enrol participants, and who will assign participants to interventions                                                                                                                                                                                                                                |
| 53 |                                  |     | <b>Page 10 (Randomisation and Blinding).</b>                                                                                                                                                                                                                                                                                                             |
| 54 |                                  |     |                                                                                                                                                                                                                                                                                                                                                          |
| 55 |                                  |     |                                                                                                                                                                                                                                                                                                                                                          |
| 56 |                                  |     |                                                                                                                                                                                                                                                                                                                                                          |
| 57 |                                  |     |                                                                                                                                                                                                                                                                                                                                                          |
| 58 |                                  |     |                                                                                                                                                                                                                                                                                                                                                          |
| 59 |                                  |     |                                                                                                                                                                                                                                                                                                                                                          |
| 60 |                                  |     |                                                                                                                                                                                                                                                                                                                                                          |



|    |                                                           |     |                                                                          |
|----|-----------------------------------------------------------|-----|--------------------------------------------------------------------------|
| 1  |                                                           |     |                                                                          |
| 2  | Blinding                                                  | 17a | Who will be blinded after assignment to interventions (eg, trial         |
| 3  | (masking)                                                 |     | participants, care providers, outcome assessors, data analysts), and     |
| 4  |                                                           |     | how.                                                                     |
| 5  |                                                           |     | <b>Page 10 (Randomisation and Blinding).</b>                             |
| 6  |                                                           |     |                                                                          |
| 7  |                                                           | 17b | If blinded, circumstances under which unblinding is permissible, and     |
| 8  |                                                           |     | procedure for revealing a participant's allocated intervention during    |
| 9  |                                                           |     | the trial                                                                |
| 10 |                                                           |     | <b>N/A</b>                                                               |
| 11 |                                                           |     |                                                                          |
| 12 |                                                           |     |                                                                          |
| 13 | <b>Methods: Data collection, management, and analysis</b> |     |                                                                          |
| 14 |                                                           |     |                                                                          |
| 15 | Data collection                                           | 18a | Plans for assessment and collection of outcome, baseline, and other      |
| 16 | methods                                                   |     | trial data, including any related processes to promote data quality (eg, |
| 17 |                                                           |     | duplicate measurements, training of assessors) and a description of      |
| 18 |                                                           |     | study instruments (eg, questionnaires, laboratory tests) along with      |
| 19 |                                                           |     | their reliability and validity, if known. Reference to where data        |
| 20 |                                                           |     | collection forms can be found, if not in the protocol                    |
| 21 |                                                           |     | <b>Page 9 (Recruitment); Page 10 (Smartphone-Delivered Wound</b>         |
| 22 |                                                           |     | <b>Assessment Tool); Table 1</b>                                         |
| 23 |                                                           |     |                                                                          |
| 24 |                                                           |     |                                                                          |
| 25 |                                                           |     |                                                                          |
| 26 |                                                           | 18b | Plans to promote participant retention and complete follow-up,           |
| 27 |                                                           |     | including list of any outcome data to be collected for participants who  |
| 28 |                                                           |     | discontinue or deviate from intervention protocols                       |
| 29 |                                                           |     | <b>Page 10 (Smartphone-Delivered Wound Assessment Tool); Page</b>        |
| 30 |                                                           |     | <b>13 (Data analysis plan)</b>                                           |
| 31 |                                                           |     |                                                                          |
| 32 |                                                           |     |                                                                          |
| 33 | Data                                                      | 19  | Plans for data entry, coding, security, and storage, including any       |
| 34 | management                                                |     | related processes to promote data quality (eg, double data entry;        |
| 35 |                                                           |     | range checks for data values). Reference to where details of data        |
| 36 |                                                           |     | management procedures can be found, if not in the protocol.              |
| 37 |                                                           |     | <b>Page 16 (Data Protection and Management).</b>                         |
| 38 |                                                           |     |                                                                          |
| 39 |                                                           |     |                                                                          |
| 40 | Statistical                                               | 20a | Statistical methods for analysing primary and secondary outcomes.        |
| 41 | methods                                                   |     | Reference to where other details of the statistical analysis plan can be |
| 42 |                                                           |     | found, if not in the protocol.                                           |
| 43 |                                                           |     |                                                                          |
| 44 |                                                           |     | <b>Page 13 (Data Analysis Plan / Outcome Measures)</b>                   |
| 45 |                                                           |     |                                                                          |
| 46 |                                                           |     |                                                                          |
| 47 |                                                           | 20b | Methods for any additional analyses (eg, subgroup and adjusted           |
| 48 |                                                           |     | analyses)                                                                |
| 49 |                                                           |     | <b>Page 13 (Data Analysis Plan / Outcome Measures)</b>                   |
| 50 |                                                           |     |                                                                          |
| 51 |                                                           | 20c | Definition of analysis population relating to protocol non-adherence     |
| 52 |                                                           |     | (eg, as randomised analysis), and any statistical methods to handle      |
| 53 |                                                           |     | missing data (eg, multiple imputation)                                   |
| 54 |                                                           |     | <b>Page 13 (Data Analysis Plan / Outcome Measures)</b>                   |
| 55 |                                                           |     |                                                                          |
| 56 |                                                           |     |                                                                          |
| 57 |                                                           |     |                                                                          |
| 58 |                                                           |     |                                                                          |
| 59 |                                                           |     |                                                                          |
| 60 |                                                           |     |                                                                          |

## Methods: Monitoring

|                                 |     |                                                                                                                                                                                                                                                                                                                                                                  |
|---------------------------------|-----|------------------------------------------------------------------------------------------------------------------------------------------------------------------------------------------------------------------------------------------------------------------------------------------------------------------------------------------------------------------|
| Data monitoring                 | 21a | Composition of data monitoring committee (DMC); summary of its role and reporting structure; statement of whether it is independent from the sponsor and competing interests; and reference to where further details about its charter can be found, if not in the protocol. Alternatively, an explanation of why a DMC is not needed<br><b>Page 16 (safety)</b> |
|                                 | 21b | Description of any interim analyses and stopping guidelines, including who will have access to these interim results and make the final decision to terminate the trial<br><b>N/A</b>                                                                                                                                                                            |
| Harms                           | 22  | Plans for collecting, assessing, reporting, and managing solicited and spontaneously reported adverse events and other unintended effects of trial interventions or trial conduct<br><b>Page 16 (safety)</b>                                                                                                                                                     |
| Auditing                        | 23  | Frequency and procedures for auditing trial conduct, if any, and whether the process will be independent from investigators and the sponsor<br><b>N/A</b>                                                                                                                                                                                                        |
| <b>Ethics and dissemination</b> |     |                                                                                                                                                                                                                                                                                                                                                                  |
| Research ethics approval        | 24  | Plans for seeking research ethics committee/institutional review board (REC/IRB) approval<br><b>Page 17 (Ethical Approval and Dissemination Plan)</b>                                                                                                                                                                                                            |
| Protocol amendments             | 25  | Plans for communicating important protocol modifications (eg, changes to eligibility criteria, outcomes, analyses) to relevant parties (eg, investigators, REC/IRBs, trial participants, trial registries, journals, regulators)<br><b>Page 17 (Ethical Approval and Dissemination Plan)</b>                                                                     |
| Consent or assent               | 26a | Who will obtain informed consent or assent from potential trial participants or authorised surrogates, and how (see Item 32)<br><b>Page 17 (Ethical Approval and Dissemination Plan)</b>                                                                                                                                                                         |
|                                 | 26b | Additional consent provisions for collection and use of participant data and biological specimens in ancillary studies, if applicable<br><b>N/A</b>                                                                                                                                                                                                              |
| Confidentiality                 | 27  | How personal information about potential and enrolled participants will be collected, shared, and maintained in order to protect confidentiality before, during, and after the trial<br><b>Page 16 (Data Protection and Management)</b>                                                                                                                          |

|    |                   |     |                                                                              |
|----|-------------------|-----|------------------------------------------------------------------------------|
| 1  |                   |     |                                                                              |
| 2  | Declaration of    | 28  | Financial and other competing interests for principal investigators for      |
| 3  | interests         |     | the overall trial and each study site                                        |
| 4  |                   |     | <b>Page 18</b>                                                               |
| 5  |                   |     |                                                                              |
| 6  | Access to data    | 29  | Statement of who will have access to the final trial dataset, and            |
| 7  |                   |     | disclosure of contractual agreements that limit such access for              |
| 8  |                   |     | investigators                                                                |
| 9  |                   |     | <b>Page 16 (Data Protection and Management)</b>                              |
| 10 |                   |     |                                                                              |
| 11 | Ancillary and     | 30  | Provisions, if any, for ancillary and post-trial care, and for               |
| 12 | post-trial care   |     | compensation to those who suffer harm from trial participation               |
| 13 |                   |     | <b>N/A</b>                                                                   |
| 14 |                   |     |                                                                              |
| 15 |                   |     |                                                                              |
| 16 | Dissemination     | 31a | Plans for investigators and sponsor to communicate trial results to          |
| 17 | policy            |     | participants, healthcare professionals, the public, and other relevant       |
| 18 |                   |     | groups (eg, via publication, reporting in results databases, or other        |
| 19 |                   |     | data sharing arrangements), including any publication restrictions           |
| 20 |                   |     | <b>Page 17 (Ethical Approval and Dissemination Plan)</b>                     |
| 21 |                   |     |                                                                              |
| 22 |                   |     |                                                                              |
| 23 |                   | 31b | Authorship eligibility guidelines and any intended use of professional       |
| 24 |                   |     | writers                                                                      |
| 25 |                   |     | <b>Page 17 (Ethical Approval and Dissemination Plan)</b>                     |
| 26 |                   |     |                                                                              |
| 27 |                   |     |                                                                              |
| 28 |                   | 31c | Plans, if any, for granting public access to the full protocol, participant- |
| 29 |                   |     | level dataset, and statistical code                                          |
| 30 |                   |     | <b>N/A</b>                                                                   |
| 31 |                   |     |                                                                              |
| 32 |                   |     |                                                                              |
| 33 | <b>Appendices</b> |     |                                                                              |
| 34 |                   |     |                                                                              |
| 35 | Informed consent  | 32  | Model consent form and other related documentation given to                  |
| 36 | materials         |     | participants and authorised surrogates                                       |
| 37 |                   |     | <b>Supplementary File</b>                                                    |
| 38 |                   |     |                                                                              |
| 39 | Biological        | 33  | Plans for collection, laboratory evaluation, and storage of biological       |
| 40 | specimens         |     | specimens for genetic or molecular analysis in the current trial and for     |
| 41 |                   |     | future use in ancillary studies, if applicable                               |
| 42 |                   |     | <b>N/A</b>                                                                   |
| 43 |                   |     |                                                                              |

---

\*It is strongly recommended that this checklist be read in conjunction with the SPIRIT 2013 Explanation & Elaboration for important clarification on the items. Amendments to the protocol should be tracked and dated. The SPIRIT checklist is copyrighted by the SPIRIT Group under the Creative Commons "[Attribution-NonCommercial-NoDerivs 3.0 Unported](https://creativecommons.org/licenses/by-nc-nd/3.0/)" license.

# BMJ Open

**Can a smartphone-delivered tool facilitate the assessment of surgical site infection and result in earlier treatment? Tracking Wound Infection with Smartphone Technology (TWIST): protocol for a randomized-controlled trial in emergency surgery patients.**

|                                 |                                                                                                                                                                                                                                                                                                                                                                                                                                                                                                                                                                                                                                                                                                                                                                                                                                                                                                                                                                                                                                                                                                                                                                                                                                                                                                                                                                                                                                                                                                                                                                                                                                                                                |
|---------------------------------|--------------------------------------------------------------------------------------------------------------------------------------------------------------------------------------------------------------------------------------------------------------------------------------------------------------------------------------------------------------------------------------------------------------------------------------------------------------------------------------------------------------------------------------------------------------------------------------------------------------------------------------------------------------------------------------------------------------------------------------------------------------------------------------------------------------------------------------------------------------------------------------------------------------------------------------------------------------------------------------------------------------------------------------------------------------------------------------------------------------------------------------------------------------------------------------------------------------------------------------------------------------------------------------------------------------------------------------------------------------------------------------------------------------------------------------------------------------------------------------------------------------------------------------------------------------------------------------------------------------------------------------------------------------------------------|
| Journal:                        | <i>BMJ Open</i>                                                                                                                                                                                                                                                                                                                                                                                                                                                                                                                                                                                                                                                                                                                                                                                                                                                                                                                                                                                                                                                                                                                                                                                                                                                                                                                                                                                                                                                                                                                                                                                                                                                                |
| Manuscript ID                   | bmjopen-2019-029620.R3                                                                                                                                                                                                                                                                                                                                                                                                                                                                                                                                                                                                                                                                                                                                                                                                                                                                                                                                                                                                                                                                                                                                                                                                                                                                                                                                                                                                                                                                                                                                                                                                                                                         |
| Article Type:                   | Protocol                                                                                                                                                                                                                                                                                                                                                                                                                                                                                                                                                                                                                                                                                                                                                                                                                                                                                                                                                                                                                                                                                                                                                                                                                                                                                                                                                                                                                                                                                                                                                                                                                                                                       |
| Date Submitted by the Author:   | 26-Aug-2019                                                                                                                                                                                                                                                                                                                                                                                                                                                                                                                                                                                                                                                                                                                                                                                                                                                                                                                                                                                                                                                                                                                                                                                                                                                                                                                                                                                                                                                                                                                                                                                                                                                                    |
| Complete List of Authors:       | McLean, Kenneth; University of Edinburgh, 51 Little France Crescent, Edinburgh, EH16 4SA, United Kingdom, Department of Clinical Surgery, Mountain, Katie; University of Edinburgh, 51 Little France Crescent, Edinburgh, EH16 4SA, United Kingdom, Department of Clinical Surgery, Shaw, Catherine; University of Edinburgh, 51 Little France Crescent, Edinburgh, EH16 4SA, United Kingdom, Department of Clinical Surgery, Drake, Thomas ; University of Edinburgh, 51 Little France Crescent, Edinburgh, EH16 4SA, United Kingdom, Department of Clinical Surgery, Ots, Riinu; University of Edinburgh, 51 Little France Crescent, Edinburgh, EH16 4SA, United Kingdom, Department of Clinical Surgery, Knight, Stephen; University of Edinburgh, 51 Little France Crescent, Edinburgh, EH16 4SA, United Kingdom, Department of Clinical Surgery, Fairfield, Cameron; University of Edinburgh, 51 Little France Crescent, Edinburgh, EH16 4SA, United Kingdom, Department of Clinical Surgery, Sgrò, Alessandro; University of Edinburgh, 51 Little France Crescent, Edinburgh, EH16 4SA, United Kingdom, Department of Clinical Surgery, Skipworth, Richard; University of Edinburgh, 51 Little France Crescent, Edinburgh, EH16 4SA, United Kingdom, Department of Clinical Surgery, Wigmore, Stephen; University of Edinburgh, 51 Little France Crescent, Edinburgh, EH16 4SA, United Kingdom, Department of Clinical Surgery, Potter, Mark; Western General Hospital, Crewe Rd S, Edinburgh, EH4 2XU, UK, Colorectal Unit<br>Harrison, Ewen ; University of Edinburgh, 51 Little France Crescent, Edinburgh, EH16 4SA, United Kingdom, Department of Clinical Surgery, |
| <b>Primary Subject Heading</b>: | Surgery                                                                                                                                                                                                                                                                                                                                                                                                                                                                                                                                                                                                                                                                                                                                                                                                                                                                                                                                                                                                                                                                                                                                                                                                                                                                                                                                                                                                                                                                                                                                                                                                                                                                        |
| Secondary Subject Heading:      | Health informatics, Patient-centred medicine                                                                                                                                                                                                                                                                                                                                                                                                                                                                                                                                                                                                                                                                                                                                                                                                                                                                                                                                                                                                                                                                                                                                                                                                                                                                                                                                                                                                                                                                                                                                                                                                                                   |
| Keywords:                       | Surgical Site Infection, SURGERY, smartphone technology                                                                                                                                                                                                                                                                                                                                                                                                                                                                                                                                                                                                                                                                                                                                                                                                                                                                                                                                                                                                                                                                                                                                                                                                                                                                                                                                                                                                                                                                                                                                                                                                                        |
|                                 |                                                                                                                                                                                                                                                                                                                                                                                                                                                                                                                                                                                                                                                                                                                                                                                                                                                                                                                                                                                                                                                                                                                                                                                                                                                                                                                                                                                                                                                                                                                                                                                                                                                                                |

1  
2  
3  
4  
5  
6  
7  
8  
9  
10  
11  
12  
13  
14  
15  
16  
17  
18  
19  
20  
21  
22  
23  
24  
25  
26  
27  
28  
29  
30  
31  
32  
33  
34  
35  
36  
37  
38  
39  
40  
41  
42  
43  
44  
45  
46  
47  
48  
49  
50  
51  
52  
53  
54  
55  
56  
57  
58  
59  
60



1  
2  
3 **Can a smartphone-delivered tool facilitate the assessment of surgical**  
4 **site infection and result in earlier treatment? Tracking Wound Infection**  
5 **with Smartphone Technology (TWIST): protocol for a randomized-**  
6 **controlled trial in emergency surgery patients.**  
7  
8  
9  
10  
11  
12  
13  
14

15 **Trial Registration:** *ClinicalTrials.gov*. Reference No: NCT02704897  
16

17  
18 **Protocol version:** 2.0.  
19

20  
21 **Funding:** This research received no specific grant from any funding agency in the public,  
22 commercial or not-for-profit sectors.  
23  
24

25  
26 **Roles and responsibilities:**

27 McLean KA<sup>1</sup>, Mountain KE <sup>1</sup>, Shaw CA<sup>1</sup>, Drake TM<sup>1</sup>, Ots R<sup>1</sup>, Knight S<sup>1</sup>, Fairfield CJ<sup>1</sup>, Sgrò  
28 A<sup>1</sup>, Skipworth R<sup>1</sup>, Wigmore SJ<sup>1</sup>, Potter M<sup>2</sup>, Harrison E<sup>1</sup>  
29

- 30  
31 1. Department of Clinical Surgery, Royal Infirmary of Edinburgh, University of  
32 Edinburgh, Edinburgh, EH16 4SA, UK  
33  
34 2. Colorectal Unit, Western General Hospital, Crewe Rd S, Edinburgh, EH4 2XU, UK  
35  
36  
37

38  
39 **Address for Correspondence**

40 Dr Kenneth A McLean  
41 Department of Clinical Surgery  
42 Royal Infirmary Edinburgh  
43 51 Little France Crescent  
44 Edinburgh  
45 EH16 4SA  
46 United Kingdom  
47

48  
49 Telephone: +44(0) 131 242 3614  
50 Email: v1kmcle6@ed.ac.uk  
51

52  
53 **Keywords:** *Surgical Site Infection, smartphone technology, surgery*  
54

55  
56 **MeSH Terms:** *Surgical Wound Infection\*, Diagnosis, Smartphone, General Surgery*  
57  
58  
59  
60

## **Abstract**

## **Introduction**

National data suggest that surgical site infection (SSI) complicates 2-10% of general surgery cases, although the patient-reported incidence is much higher. SSIs cause significant patient morbidity and represent a significant burden on acute healthcare services, in a cohort predominantly suitable for outpatient management. Over three-quarters of UK adults now own smartphones, which could be harnessed to improve access to care. We aim to investigate if a smartphone-delivered wound assessment tool results in earlier treatment.

## **Methods and Analysis**

This is a randomised-controlled trial aiming to recruit 500 patients across NHS hospitals. All emergency abdominal surgery patients over the age of 16 who own smartphones will be considered eligible, with the exclusion of those with significant visual impairment.

Participants will be randomised in a 1:1 ratio between standard post-operative care and the intervention – use of the smartphone tool in addition to standard post-operative care. The main outcome measure will be time-to-diagnosis of SSI with secondary outcome measures considering use of Emergency Department (ED) and General Practitioner (GP) services and patient experience. Follow-up will be conducted by clinicians blinded to group allocation. Analysis of time-to-diagnosis will be by comparison of means using an independent 2 sample t-test.

## **Ethics and Dissemination**

This is the first randomised controlled trial on the use of a smartphone-delivered wound assessment tool to facilitate the assessment of surgical site infection and the impact on time-to-diagnosis. The intervention is being used in addition to standard post-operative care. The study design and protocol were reviewed and approved by Southeast Scotland

1  
2 Research and Ethics Committee (REC Ref: 16/SS/0072 24/05/2016). Study findings will be  
3  
4 presented at academic conferences, published in peer-reviewed journals, and are expected  
5  
6 in 2020. A written lay summary will be available to study participants on request.  
7  
8

## 9 **Trial Registration**

10  
11  
12 *ClinicalTrials.gov*. Reference No: NCT02704897  
13  
14  
15  
16  
17  
18  
19  
20  
21  
22  
23  
24  
25  
26  
27  
28  
29  
30  
31  
32  
33  
34  
35  
36  
37  
38  
39  
40  
41  
42  
43  
44  
45  
46  
47  
48  
49  
50  
51  
52  
53  
54  
55  
56  
57  
58  
59  
60



## Strengths and Limitations of this Study:

- This is the first randomised controlled trial on the use of a smartphone-delivered wound assessment tool to facilitate the assessment of surgical site infection and the impact on time-to-diagnosis.
- There are broad eligibility criteria, and so it is expected the results will be generalisable to a wide population of patients undergoing abdominal surgery.
- Due to the nature of the intervention, only clinicians undertaking follow-up can be blinded to randomisation status.
- All patients will receive 30-day telephone or face-to-face follow-up to determine the occurrence of surgical site infections, however the gold-standard for diagnosis remains direct clinical assessment.
- Data on patient experience and acceptability of smartphone-delivered follow-up will be collected concurrently to guide future implementation of future telehealth interventions.

review only

## Introduction

Surgical site infection (SSI) complicates 2-10% of general surgical cases, with the highest rates of infection seen after colorectal surgery<sup>1</sup>. Infection and re-admission rates have not significantly changed in the last 10 years. The most common causative group is *Enterobacteriaceae* (25% of cases), with *Staph. Aureus* (10%) and MRSA (3%) accounting for a small proportion of overall cases<sup>1</sup>. National surveillance data from Scotland indicate that peak incidence of infection is between day 6-12 post-operatively<sup>2</sup>.

A recent study indicated that national reports may underestimate the true incidence of SSI, and suggested that patient reported SSI is a more sensitive measure<sup>3</sup>. Many patients will have already consulted their General Practitioner (GP) or attended the Emergency Department (ED) prior to surgical assessment. In addition, many patients have concerns about their wounds (in the absence of infection) and may experience delays in accessing appropriate medical assessment. Thus, SSI represents a significant burden on healthcare services, in a patient group who are predominantly appropriate for outpatient management.

There is currently an increased research focus on digital health: the use of communications technology to enhance healthcare, public health and delivery of health education<sup>4</sup>. There are several advantages to this approach, in particular the potential to improve access to care, and help streamline usage of emergency services. Indeed, there is evidence that these technologies have been used to improve outcome<sup>5</sup>, as well as to reduce specialist workload<sup>6</sup> and ED attendances<sup>7</sup>. In addition, the increasing use of healthcare technology is likely to help improve automatic data collection and recording, which may be used to identify areas for future research and drive quality improvement<sup>4</sup>.

1 Over three-quarters (78%) of UK adults now own smartphones <sup>8</sup>, with at least a third using  
2 a smartphone as their primary device to access the internet <sup>4</sup>. Therefore, there is vast  
3 potential for the use of smartphones in digital health, with a growing literature on the use in  
4 the context of postoperative community follow-up <sup>9 10</sup>. Given the frequency with which  
5 patients report post-operative wound complications and the high incidence of SSI, this has  
6 become a research focus in telemedicine for postoperative care <sup>11 12</sup>. We aim to investigate  
7 if an online wound assessment tool can be used to help diagnose SSI and improve patient  
8 access to care and clinical assessment. In addition, we aim to investigate if this results in  
9 earlier intervention to treat SSI and a decreased attendance at ED and GPs. The  
10 widespread use of smartphones, the integrated nature of their technology, and their  
11 portability means smartphones represent the best platform to deliver this tool, with the aim  
12 of facilitating rapid access to clinical care.

### 30 **Objectives**

31 This randomised-controlled trial will investigate whether a smartphone-delivered wound  
32 assessment tool can be used in the diagnosis of SSI and result in earlier treatment. It will  
33 also assess for a reduction in ED and GP attendances as a result of using the intervention.  
34 Data on patient experience will be used to evaluate perceived utility of the tool.

## Methods and Analysis

### Overview

This is a superiority randomised-controlled trial, using a parallel two-arm design (Figure 1).

Once consent is obtained, participants will be randomised in a 1:1 ratio to either the intervention arm (receiving standard post-operative care plus access to the smartphone-delivered wound assessment tool), or the control arm (standard post-operative care).

Patients will be recruited from the emergency surgery inpatient service across NHS Lothian.

The trial period will be 30 days. An internal pilot study in the first 80 patients recruited will be conducted to ensure the trial design is practical and deliverable. Following assessment of pilot data, there will be an opportunity to adapt the trial design in response to the pilot study findings. Participants will be followed-up by a researcher blinded to the intervention status.

The primary outcome measure will be the number of days from surgery to diagnosis of SSI (time-to-diagnosis), with ED and GP service use as a secondary outcome measure.

Additional data regarding patient experience will also be collected from patients in both arms of the trial via a smartphone-delivered questionnaire at 30 days.

### Research Setting

This research is being carried out in a large health board, serving a mixed urban and rural population of over 800,000. The emergency surgery service admits 300 patients per week between participating sites and performs 2500 procedures annually.

### Participants

Emergency surgery inpatients who are adults (over age 16) and have undergone abdominal surgery (on the same admission as diagnosis) will be screened for eligibility. Potentially eligible patients will be screened and documented as (a) eligible and included, (b) eligible and missed, (c) eligible and declined (iv) ineligible (visual impairment) (v) ineligible (no smartphone). Written consent will be obtained by the research team in line with Good

1  
2 Clinical Practice Guidance. Participation is voluntary and a patient's decision regarding  
3 participation will not affect any aspect of their care in the case of refusal. Participants will  
4 have the right to withdraw from the study at any point.  
5  
6  
7  
8  
9

### 10 11 ***Inclusion Criteria***

12 Patients admitted to the emergency surgery inpatient service who meet the following criteria  
13 will be included in the study:  
14  
15

- 16 • Emergency surgery inpatients who have undergone abdominal surgery;
  - 17 • Owners of a smartphone, with access to internet;
  - 18 • Adults over the age over 16;
  - 19 • Able to give informed consent.
- 20  
21  
22  
23  
24  
25  
26  
27  
28  
29  
30

### 31 ***Exclusion Criteria***

32 Any patients with significant visual impairment preventing use of the online questionnaire  
33 will be excluded from the study (defined by self-reporting of the patient)  
34  
35  
36  
37  
38  
39

### 40 ***Study Procedures***

#### 41 **Recruitment**

42 The clinical team will inform potentially eligible patients about the on-going trial, and offer  
43 them further information (written and verbal from the research team). Eligible patients will  
44 be recruited postoperatively as inpatients, with formal written consent taken by a member of  
45 the research team. Baseline information gathered will include: reason for admission, index  
46 procedure and date, significant co-morbidities – including history of diabetes or  
47 immunosuppression, as well as age and BMI. Participant contact details (mobile telephone  
48 number) will be entered into a secure, online data collection tool (Research Electronic Data  
49 Capture (REDCap) database) <sup>13</sup>.  
50  
51  
52  
53  
54  
55  
56  
57  
58  
59  
60

## Randomisation and Blinding

Participants will be assigned in a 1:1 ratio to the intervention or control arms and provided with the appropriate information packs prior to discharge. Simple randomization will be carried out using REDCap<sup>13</sup>, utilising a computer-generated random number sequence. The emergency surgery nurses (who will provide care to patients as required during the trial), and those taking consent (which may include medical students and qualified clinicians) will not be blinded. The clinicians undertaking follow-up will be blinded to status. A trial entry will be made in the clinical notes, including contact details for the trial team should a member of the clinical team require more information or wish to discover their trial status.

## Intervention

### Smartphone-Delivered Wound Assessment Tool

A wound-based instrument to detect potential wound infection was developed. Our smartphone-delivered wound assessment model was based on the Centre for Disease Control and Prevention (CDC) classification criteria, and the ASEPSIS model (Additional treatment, Serous discharge, Erythema, Purulent exudate, and Separation of the deep tissues, the Isolation of bacteria, and the duration of Inpatient Stay).<sup>14 15</sup> It detects symptoms of SSI and symptoms of systemic illness as a result of this, whilst being quick and simple to use (Table 1).

Participants will have access to the smartphone-delivered wound assessment tool on discharge via a link sent by short-messaging system (SMS) to their smartphones. If at any time they have concerns about their wound, they can access the tool, and will be advised based on their responses. When a patient response is submitted, the research team will be automatically notified, and prompted to reply (Figure 2).

1  
2 In addition, a link to the smartphone-delivered wound assessment tool will be sent on days  
3  
4 3, 7, and 15 post-operatively. These time-points have been selected to include peak  
5  
6 incidence of infection and cover the time-course of wound healing. This will ensure the  
7  
8 collection of negative data in those without symptoms and will therefore assist in  
9  
10 determining the specificity of the tool. If participants do not respond they will be sent a  
11  
12 single reminder at these time-points.  
13  
14  
15  
16  
17  
18

### 19 **Wound Photographs**

20 Participants will be asked to upload at least one photograph of their wound each time they  
21  
22 use the smartphone-delivered wound assessment tool. These will be reviewed by a clinical  
23  
24 researcher and assigned into one of 3 categories: no concerns, medium-risk, high-risk.  
25  
26 Further machine learning-based assessment of wound photographs will be investigated.  
27  
28  
29  
30  
31  
32

### 33 **Responses**

34 An experienced clinician (surgical registrar or consultant) will review all participant  
35  
36 responses and photographs in real-time. Based on the response and the wound  
37  
38 photographs, they will contact the patient by SMS with advice regarding the need for further  
39  
40 assessment. The clinician will classify participants into 3 groups: no concern, medium-risk,  
41  
42 high-risk. These three groups were agreed collectively by the researchers in collaboration  
43  
44 with the emergency surgical team. Three potential outcomes were identified: (i) the patient  
45  
46 does not require further assessment (no concern), (ii) the patient requires further  
47  
48 assessment, but the symptoms identified suggest a mild infection (medium-risk), (iii) the  
49  
50 symptoms suggest a potentially severe infection requiring urgent assessment (high-risk).  
51  
52 The wound photographs will also be reviewed by the experienced clinician where available  
53  
54 and classified into the same 3 groups. This may be used by the researcher to refine their  
55  
56 response to the tool, if they consider this necessary.  
57  
58  
59  
60

## Algorithm

An algorithm has been designed to classify participant responses into the same 3 categories listed above (Table 1). This will be run on all participant responses (but will not impact on care), and will be compared with clinician rating, as a secondary sub-study. The correlation between clinician response, algorithm response and photo response will be used to determine if the algorithm can be used to assess for SSI independent of the responsible doctor.

## Action from Response

Participants whose responses raise no concerns will be advised of this. Participants who report symptoms consistent with wound infection will be directed for further assessment. Those in the medium-risk group will be directed to community care whilst those in the high-risk group will be advised to return for assessment at the centre where they had their procedure. This advice aligns to the degree of concern identified above.

## Wound Reviews

For those in the intervention group who are identified as high-risk, the emergency surgery nurses will collect a wound swab from the patient to test for causative organisms (and aid in confirming infection). If a wound infection is diagnosed clinically, the patient will be started with antibiotics in line with local guidelines. This will be logged in the patient's trial record. If any patients in the control group attend the emergency surgery service for a review the same procedures will apply.

GPs will be informed about their patient's participation in the trial. We will request that if a participant enrolled in the trial visits their GP a wound swab is taken, and that they are



1 treated in line with the GP's normal practice. This will also apply to those in the medium-risk  
2  
3  
4 group who will be directed to their GP.  
5  
6  
7

8 All participants will be given a log to take to any wound reviews, and wound swabs may be  
9  
10 taken of wound discharge or the wound bed as appropriate. If an infection is diagnosed the  
11  
12 date treatment is commenced will be noted, alongside any intervention performed. This will  
13  
14 then be returned to the trial team, and used in follow-up.  
15  
16  
17

### 21 **30 Day Follow-up**

22 Both arms will receive a follow-up face-to-face or telephone consultation 30 days post-  
23  
24 operatively (alternatively, written follow-up is also available for those with significant hearing  
25  
26 impairment). This consultation will follow a standardized format and will be conducted with  
27  
28 an independent clinical researcher blinded to the intervention status. The clinical researcher  
29  
30 will gather data on post-operative course, any symptoms related to the wound, and any  
31  
32 treatment offered. They will also have access to electronic patient record (including all  
33  
34 microbiology results from swabs taken in the community or hospital) and any wound logs  
35  
36 returned. On the basis of these three sources of information, two independent, blinded  
37  
38 clinical researchers will determine if an infection has been present (trained using the CDC  
39  
40 Criteria to diagnose infection).<sup>14</sup> Data on patient experience and service usage – ED and  
41  
42 GP attendances, as well as contact with emergency surgery nurses – will also be collected  
43  
44 via a separate questionnaire delivered alongside the 30 day follow-up (Table 2).  
45  
46  
47  
48  
49  
50

### 51 **Data Analysis Plan**

52 All analysis will be carried out on an intention-to-treat basis. We do not anticipate missing  
53  
54 data in patient demographics. However, any missing data values will be handled using  
55  
56 multiple imputation. The volume of missing outcome data will be recorded for the control  
57  
58  
59  
60

1 and intervention arms, and any differences in drop-out rate noted. Thereafter patients with  
2 missing outcome data will be excluded from analysis.  
3  
4  
5  
6  
7  
8

## 9 **Outcome Measures**

10 This is a superiority RCT, and the primary outcome will be mean time from operation to  
11 diagnosis (time-to-diagnosis) of SSI. This outcome has been chosen (rather than time from  
12 symptom onset), as it can be more accurately recorded and is a measure of improved  
13 access to care. We assume an equal incidence of SSI in both groups and will ensure this  
14 using odds ratios. Time-to-diagnosis will also be compared using Cox proportional hazard  
15 regression analysis, a *P* value of <0.05 will be considered statistically significant.  
16  
17  
18  
19  
20  
21  
22  
23  
24  
25  
26  
27

28 For the intervention, we will calculate the sensitivity and specificity of the researcher  
29 response, the algorithm response, and photograph response in the diagnosis of SSI. We  
30 will compare the correlation of the algorithm, which is based on questionnaire responses,  
31 with clinician advice and eventual diagnosis. Correlation analysis will be performed using  
32 Kendall tau rank test. This will assess the accuracy of the algorithm in stratifying risk, as  
33 compared to a clinician, and will indicate what additional benefit may be gained from  
34 photographic analysis.  
35  
36  
37  
38  
39  
40  
41  
42  
43  
44  
45  
46

47 The secondary outcome measure will be use of services: GP and ED attendances, as well  
48 as contact with emergency surgery nurses. This data will be gathered at 30 days.  
49

50 Differences in number of attendees to GP and ED will be compared using a  $\chi^2$  test.  
51

52 Differences in the number of attendances will be assessed using the Mann-Whitney U-test.  
53

54 Data on patient experience will also be gathered via a follow-up questionnaire and analysed  
55 separately (Table 2). This will help determine if an online questionnaire delivered via a  
56  
57  
58  
59  
60

1  
2 smartphone has a positive impact on patient experience of care, and if it helped facilitate  
3  
4 their access to care.  
5  
6  
7  
8  
9

## 10 **Sample Size and Power Analysis**

11 Our primary outcome measure is time-to-diagnosis and we aim to detect a one-day  
12  
13 difference with a power of 90% (alpha 0.05). Assuming a standard deviation of 1 day in  
14  
15 time-to-diagnosis, 22 wound infections per group will be required. Estimating a 10% rate of  
16  
17 wound infection (in line with National Data)<sup>2</sup> and a drop-out rate of 10%, a sample size of  
18  
19 490 will be required (recruitment target 500 patients). Analyses will be intention-to-treat.  
20  
21  
22  
23  
24

25 Assuming that 50 operations are performed per week and two thirds of these patients are  
26  
27 likely to own smartphones, we estimate there will be 30 potentially eligible patients per  
28  
29 week. Aiming for recruitment of 25% of eligible patients, we estimate a continuous  
30  
31 recruitment time of 16 months. This rate of recruitment will also enable the researcher to  
32  
33 respond to all patient concerns in a timely manner.  
34  
35  
36  
37  
38  
39

## 40 **Ethics and dissemination:**

### 41 **Safety**

42 All participants will receive the normal standard of care. The smartphone-based intervention  
43  
44 is in addition to the normal standard of care. If at any point participants have any concerns.  
45  
46 they will be advised to contact the emergency surgery nurses regarding their care (in line  
47  
48 with normal standard of care). Out-of-hours they will be advised to contact NHS out-of-  
49  
50 hours services. Participants will be advised to contact the emergency surgery nurses if they  
51  
52 have any concerns whilst they are awaiting a response to the tool. The research team will  
53  
54 be notified automatically that a participant is awaiting a response, ensuring that in normal  
55  
56 working hours patients receive a rapid reply. They will also be advised that if they access  
57  
58  
59  
60

1 the tool at night, that it will not be reviewed until the following day. They will be advised to  
2 contact out-of-hours services if they require an overnight assessment. These actions will  
3 prevent any harm to patients resulting from a delayed response to the wound assessment  
4 tool. A potential consequence of closer follow-up of these postoperative patients could be  
5 increased identification of superficial SSI which would likely otherwise self-resolve, however  
6 this would closer surveillance or treatment if appropriate (this decision is made by an  
7 independent clinician at the time of review). Due to the low-risk nature of the trial, a formal  
8 data-monitoring committee has not been nominated.

### ***Data Protection and Management***

9 All participant data will be stored securely in a REDCap<sup>13</sup> database that has controlled  
10 access and designed as compliant with HIPAA-Security guidelines. This data will be  
11 anonymised, and only available to researchers listed on the protocol. Participant responses  
12 to the questionnaire will be reported directly to the REDCap database and will not be stored  
13 on patient phones. However, patients will be advised to review the security setting on their  
14 phone if they intend to store their wound photographs. Patient details will be recorded in a  
15 trial log should any safety concerns arise necessitating they be contacted.

### ***Ethical Approval and Dissemination Plan***

16 The study design and protocol were reviewed and approved by Southeast Scotland  
17 Research and Ethics Committee (REC Ref: 16/SS/0072 24/05/2016), and any protocol  
18 amendments will be resubmitted for review. The study is sponsored by ACCORD, a  
19 collaboration between the University of Edinburgh and NHS Lothian Research and  
20 Development. In line with Good Clinical Practice Guidance, written consent will be obtained  
21 by appropriately trained medical students or clinicians. Participation is voluntary and a

1 patient's decision regarding participation will not affect any aspect of their care in the case  
2  
3  
4 of refusal. Participants will have the right to withdraw from the study at any point.  
5  
6  
7

8 Authorship on any papers derived from the study will be all authors involved in study design  
9  
10 and protocol development, and any additional researchers involved in the writing group.  
11

12 Furthermore, patient recruiters who have recruited more than the prespecified 15 patients  
13  
14 to the study will be listed as a "collaborator". All other persons involved in the study will be  
15  
16 listed in the acknowledgements.  
17  
18

19  
20  
21  
22 There are no financial and other competing interests for principal investigators for the  
23  
24 overall trial or either study site. Study findings will be reported in line with CONSORT  
25  
26 guidelines, and disseminated in the printed media, and learned forums, and are expected in  
27  
28 2020. A written lay summary will be available to study participants on request.  
29  
30

### 31 32 ***Patient and Public Involvement*** 33

34 Patients were not directly involved in the design or delivery of this trial, however data on  
35  
36 patient experience in using the smartphone tool will be evaluated via a follow-up  
37  
38 questionnaire. This will inform future development and dissemination of this intervention. A  
39  
40 summary of results will be provided to all patients involved once the trial has been  
41  
42 completed and analysed.  
43  
44  
45  
46  
47  
48  
49  
50  
51  
52  
53  
54  
55  
56  
57  
58  
59  
60

## Authors' Contributions

(1) Conception and design: KEM, CAS, TMD, KAM, RO, AS, RS, MP, SJW, EH. (2) Drafting the manuscript: KAM, KEM, CAS, TMD, RO, SK, CJF, AS. (4) Critical revision of the manuscript for scientific and factual content: KAM, KEM, CAS, TMD, RO, SK, CJF, AS, RS, MP, SJW, EH. Supervision: RS, MP, SJW, EH. All authors read and approved the final manuscript.

## Funding

This research received no specific grant from any funding agency in the public, commercial or not-for-profit sectors.

## Competing interests

The authors do not have any conflicts of interest to declare.

**Word Count:** 3,154

**Figure 1:** Schema of trial events for intervention and control arms.

**Figure 2:** Handling of wound questionnaire submissions.

## Tables:

**Table 1:** Questions included in smartphone-delivered questionnaire and independent algorithm scoring system.

| Smartphone-delivered wound assessment                                                                    |                                                                                                                              | Algorithm scoring system |                                |                                |
|----------------------------------------------------------------------------------------------------------|------------------------------------------------------------------------------------------------------------------------------|--------------------------|--------------------------------|--------------------------------|
| Question                                                                                                 | Response (score)                                                                                                             | Low-risk                 | Medium-Risk                    | High-risk                      |
| Is the pain worse than immediately after the operation?                                                  | No (0), Yes (1)                                                                                                              | Inflammation<br>Score 0  | Inflammation<br>Score $\leq 2$ | Inflammation<br>Score $\geq 3$ |
| Is there new redness around your wound site excluding the wound itself?                                  | No (0), Yes (1)                                                                                                              |                          |                                |                                |
| Is there more swelling around your wound site than at the time of surgery?                               | No (0), Yes (1)                                                                                                              |                          |                                |                                |
| Are you experiencing a new burning sensation or heat at the wound site?                                  | No (0), Yes (1)                                                                                                              |                          |                                |                                |
|                                                                                                          |                                                                                                                              | <b>AND</b>               | <b>AND</b>                     | <b>OR</b>                      |
| Is there liquid coming from the wound site? If so, please select which option best describes the liquid. | No (0),<br>Yes – clear (1),<br>Yes – bloody (1),<br>Yes – yellowish (1),<br>Yes – thick/yellow (2),<br>Yes – green/brown (2) | Discharge<br>Score 0     | Discharge<br>Score $\leq 1$    | Discharge<br>Score 2           |
| Is your wound opening or gaping?                                                                         | No, Yes                                                                                                                      | Not scored in algorithm  |                                |                                |
| Have you experienced fevers in the last 24 hours?                                                        | No, Yes                                                                                                                      |                          |                                |                                |
| Please upload a photograph of your wound.                                                                | Photograph                                                                                                                   | Not scored in algorithm  |                                |                                |

**Table 2:** Questions included in smartphone-delivered 30-day patient experience questionnaire.

| Smartphone-delivered 30-day patient experience questionnaire                                                                                                                        |                                                                           |
|-------------------------------------------------------------------------------------------------------------------------------------------------------------------------------------|---------------------------------------------------------------------------|
| Question                                                                                                                                                                            | Available responses                                                       |
| 1. Did you have access to the smartphone tool?                                                                                                                                      | Yes, No                                                                   |
| 2. If you had access to the tool, how many times did you use the tool (not including the reminder questions sent)?                                                                  | [integer]                                                                 |
| 3. If you had access to the tool, please rate the extent to which you agree/disagree with the statements below:                                                                     |                                                                           |
| a. The tool was easy to use<br>b. I understood the questions in the tool<br>c. It was easy to upload my wound photo<br>d. The response from the tool was helpful                    | Strongly Disagree, Disagree, Neutral / No opinion, Agree, Strongly Agree. |
| 4. Please rate the extent to which you agree/disagree with the statements below:                                                                                                    |                                                                           |
| a. It was easy to get hold of advice about my wound when needed<br>b. I had to wait more than 1 day for advice about my wound<br>c. The advice I received about my wound was useful | Strongly Disagree, Disagree, Neutral / No opinion, Agree, Strongly Agree. |



## References:

1. Public Health England. Surgical site infection surveillance service (SSISS). 2014
2. Health Protection Scotland (HPS). Scottish surveillance of healthcare associated infection Programme (SSHAIP). 2012
3. Pham JC, Ashton MJ, Kimata C, et al. Surgical site infection: Comparing surgeon versus patient self-report. *Journal of Surgical Research* 2016;202(1):95-102.
4. Imison C, Castle-Clarke S, Watson R, et al. Delivering the benefits of digital health care research summary, 2016.
5. Zhou YY, Kanter MH, Wang JJ, et al. Improved quality at Kaiser Permanente through e-mail between physicians and patients. *Health Affairs* 2010;29(7):1370-75.
6. Caffery L, Smith A. A Literature Review of Email-based Telemedicine. *Studies in Health Technology and Informatics* 2010;161:20-34.
7. Hex N, Tuggey J, Wright D, et al. Telemedicine in care homes in Airedale, Wharfedale and craven. *Clinical Governance: An International Journal* 2015;20(3):146-54.
8. Office of Communications (OFCOM). Communications Market Report 2018. London: OFCOM, 2019.
9. Armstrong KA, Coyte PC, Brown M, et al. Effect of Home Monitoring via Mobile App on the Number of In-Person Visits Following Ambulatory Surgery: A Randomized Clinical Trial Monitoring via Mobile App and In-Person Visits After Ambulatory Surgery. *JAMA Surgery* 2017;152(7):622-27.
10. Gunter RL, Chouinard S, Fernandes-Taylor S, et al. Current Use of Telemedicine for Post-Discharge Surgical Care: A Systematic Review. *Journal of the American College of Surgeons* 2016;222(5):915-27.
11. Gunter RL, Fernandes-Taylor S, Rahman S, et al. Feasibility of an Image-Based Mobile Health Protocol for Postoperative Wound Monitoring. *Journal of the American College of Surgeons* 2018;226(3):277-86.
12. Kummerow Broman K, Gaskill CE, Faqih A, et al. Evaluation of Wound Photography for Remote Postoperative Assessment of Surgical Site Infections. *JAMA Surgery* 2019;154(2):117-24.
13. Harris PA, Taylor R, Thielke R, et al. Research electronic data capture (REDCap)—A metadata-driven methodology and workflow process for providing translational research informatics support. *Journal of Biomedical Informatics* 2009;42(2):377-81.
14. Centre for Disease Control and Prevention (CDC) National Healthcare Safety Network (NHSN). Patient Safety Component (PSC) Manual Chapter 9: Surgical site infection (SSI) event. In: CDC, ed. Atlanta: CDC, 2016.

- 1  
2 15. Wilson APR, Sturridge MF, Treasure T, et al. A scoring method (ASEPSIS) for  
3 postoperative wound infections for use in clinical trials of antibiotic prophylaxis. *The*  
4 *Lancet* 1986;327(8476):311-12.  
5  
6  
7  
8  
9  
10  
11  
12  
13  
14  
15  
16  
17  
18  
19  
20  
21  
22  
23  
24  
25  
26  
27  
28  
29  
30  
31  
32  
33  
34  
35  
36  
37  
38  
39  
40  
41  
42  
43  
44  
45  
46  
47  
48  
49  
50  
51  
52  
53  
54  
55  
56  
57  
58  
59  
60

For peer review only

1  
2  
3  
4  
5  
6  
7  
8  
9  
10  
11  
12  
13  
14  
15  
16  
17  
18  
19  
20  
21  
22  
23  
24  
25  
26  
27  
28  
29  
30  
31  
32  
33  
34  
35  
36  
37  
38  
39  
40  
41  
42  
43  
44  
45  
46  
47  
48  
49  
50  
51  
52  
53  
54  
55  
56  
57  
58  
59  
60

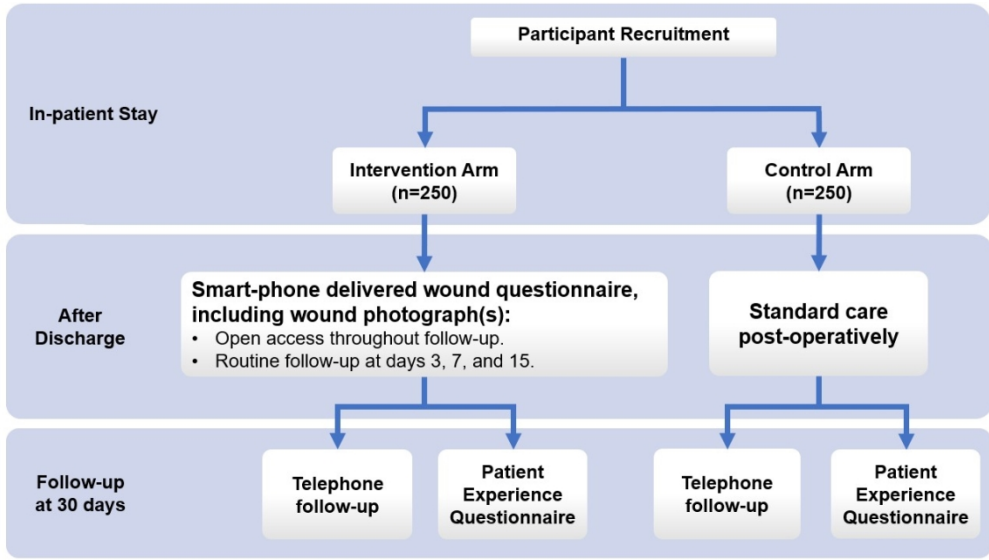

Figure 1: Schema of trial events for intervention and control arms

812x453mm (120 x 120 DPI)

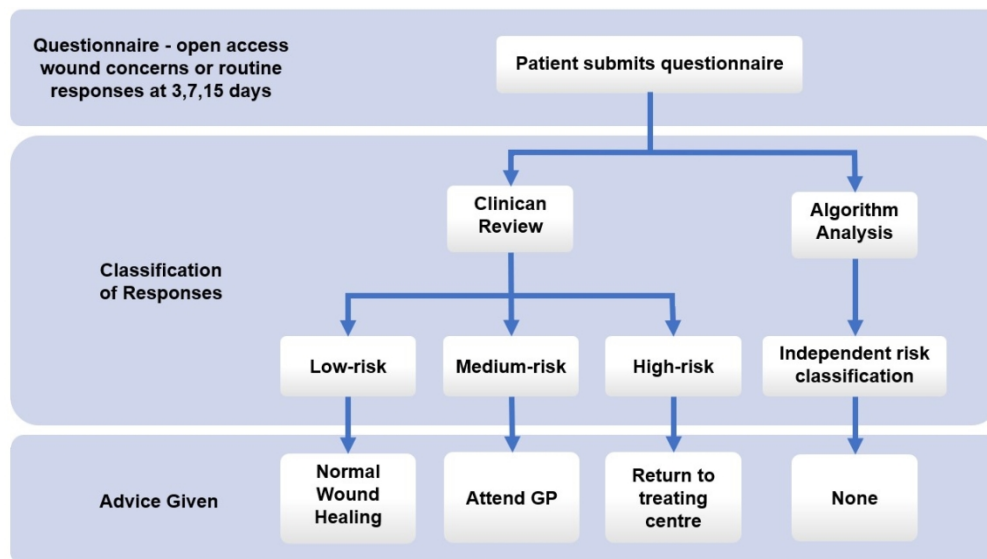

Figure 2: Handling of wound questionnaire submissions

811x454mm (120 x 120 DPI)

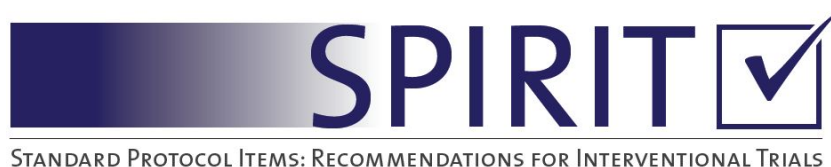

STANDARD PROTOCOL ITEMS: RECOMMENDATIONS FOR INTERVENTIONAL TRIALS

SPIRIT 2013 Checklist: Recommended items to address in a clinical trial protocol and related documents\*

| Section/item                      | Item No | Description                                                                                                                                                                                                                                                                                                                                                                |
|-----------------------------------|---------|----------------------------------------------------------------------------------------------------------------------------------------------------------------------------------------------------------------------------------------------------------------------------------------------------------------------------------------------------------------------------|
| <b>Administrative information</b> |         |                                                                                                                                                                                                                                                                                                                                                                            |
| Title                             | 1       | Descriptive title identifying the study design, population, interventions, and, if applicable, trial acronym<br><br><b>Can a smartphone-delivered tool facilitate the assessment of surgical site infection and result in earlier treatment? Tracking Wound Infection with Smartphone Technology (TWIST): a randomized-controlled trial in emergency surgery patients.</b> |
| Trial registration                | 2a      | Trial identifier and registry name. If not yet registered, name of intended registry.<br><b>ClinicalTrials.gov. Reference No: NCT02704897</b>                                                                                                                                                                                                                              |
|                                   | 2b      | All items from the World Health Organization Trial Registration Data Set<br><b>ClinicalTrials.gov. Reference No: NCT02704897</b>                                                                                                                                                                                                                                           |
| Protocol version                  | 3       | Date and version identifier<br><b>Page 1</b>                                                                                                                                                                                                                                                                                                                               |
| Funding                           | 4       | Sources and types of financial, material, and other support<br><b>Page 1</b>                                                                                                                                                                                                                                                                                               |
| Roles and responsibilities        | 5a      | Names, affiliations, and roles of protocol contributors<br><b>Page 1</b>                                                                                                                                                                                                                                                                                                   |
|                                   | 5b      | Name and contact information for the trial sponsor<br><b>Page 1</b>                                                                                                                                                                                                                                                                                                        |
|                                   | 5c      | Role of study sponsor and funders, if any, in study design; collection, management, analysis, and interpretation of data; writing of the report; and the decision to submit the report for publication, including whether they will have ultimate authority over any of these activities<br><b>Page 1</b>                                                                  |

|    |                                                           |     |                                                                                                                                                                                                                                                                  |
|----|-----------------------------------------------------------|-----|------------------------------------------------------------------------------------------------------------------------------------------------------------------------------------------------------------------------------------------------------------------|
| 1  |                                                           |     |                                                                                                                                                                                                                                                                  |
| 2  |                                                           | 5d  | Composition, roles, and responsibilities of the coordinating centre, steering committee, endpoint adjudication committee, data management team, and other individuals or groups overseeing the trial, if applicable (see Item 21a for data monitoring committee) |
| 3  |                                                           |     | <b>Page 1</b>                                                                                                                                                                                                                                                    |
| 4  |                                                           |     |                                                                                                                                                                                                                                                                  |
| 5  |                                                           |     |                                                                                                                                                                                                                                                                  |
| 6  |                                                           |     |                                                                                                                                                                                                                                                                  |
| 7  |                                                           |     |                                                                                                                                                                                                                                                                  |
| 8  |                                                           |     |                                                                                                                                                                                                                                                                  |
| 9  | <b>Introduction</b>                                       |     |                                                                                                                                                                                                                                                                  |
| 10 |                                                           |     |                                                                                                                                                                                                                                                                  |
| 11 | Background and rationale                                  | 6a  | Description of research question and justification for undertaking the trial, including summary of relevant studies (published and unpublished) examining benefits and harms for each intervention                                                               |
| 12 |                                                           |     | <b>Page 5-6</b>                                                                                                                                                                                                                                                  |
| 13 |                                                           |     |                                                                                                                                                                                                                                                                  |
| 14 |                                                           |     |                                                                                                                                                                                                                                                                  |
| 15 |                                                           |     |                                                                                                                                                                                                                                                                  |
| 16 |                                                           | 6b  | Explanation for choice of comparators                                                                                                                                                                                                                            |
| 17 |                                                           |     | <b>Page 5-6</b>                                                                                                                                                                                                                                                  |
| 18 |                                                           |     |                                                                                                                                                                                                                                                                  |
| 19 |                                                           |     |                                                                                                                                                                                                                                                                  |
| 20 | Objectives                                                | 7   | Specific objectives or hypotheses                                                                                                                                                                                                                                |
| 21 |                                                           |     | <b>Page 7</b>                                                                                                                                                                                                                                                    |
| 22 |                                                           |     |                                                                                                                                                                                                                                                                  |
| 23 | Trial design                                              | 8   | Description of trial design including type of trial (eg, parallel group, crossover, factorial, single group), allocation ratio, and framework (eg, superiority, equivalence, noninferiority, exploratory)                                                        |
| 24 |                                                           |     | <b>Page 8 (overview)</b>                                                                                                                                                                                                                                         |
| 25 |                                                           |     |                                                                                                                                                                                                                                                                  |
| 26 |                                                           |     |                                                                                                                                                                                                                                                                  |
| 27 |                                                           |     |                                                                                                                                                                                                                                                                  |
| 28 |                                                           |     |                                                                                                                                                                                                                                                                  |
| 29 | <b>Methods: Participants, interventions, and outcomes</b> |     |                                                                                                                                                                                                                                                                  |
| 30 |                                                           |     |                                                                                                                                                                                                                                                                  |
| 31 | Study setting                                             | 9   | Description of study settings (eg, community clinic, academic hospital) and list of countries where data will be collected. Reference to where list of study sites can be obtained                                                                               |
| 32 |                                                           |     | <b>Page 8 (research setting)</b>                                                                                                                                                                                                                                 |
| 33 |                                                           |     |                                                                                                                                                                                                                                                                  |
| 34 |                                                           |     |                                                                                                                                                                                                                                                                  |
| 35 |                                                           |     |                                                                                                                                                                                                                                                                  |
| 36 |                                                           |     |                                                                                                                                                                                                                                                                  |
| 37 | Eligibility criteria                                      | 10  | Inclusion and exclusion criteria for participants. If applicable, eligibility criteria for study centres and individuals who will perform the interventions (eg, surgeons, psychotherapists)                                                                     |
| 38 |                                                           |     | <b>Page 8-9 (Patients, inclusion criteria, exclusion criteria)</b>                                                                                                                                                                                               |
| 39 |                                                           |     |                                                                                                                                                                                                                                                                  |
| 40 |                                                           |     |                                                                                                                                                                                                                                                                  |
| 41 |                                                           |     |                                                                                                                                                                                                                                                                  |
| 42 |                                                           |     |                                                                                                                                                                                                                                                                  |
| 43 | Interventions                                             | 11a | Interventions for each group with sufficient detail to allow replication, including how and when they will be administered.                                                                                                                                      |
| 44 |                                                           |     | <b>Page 10-13</b>                                                                                                                                                                                                                                                |
| 45 |                                                           |     |                                                                                                                                                                                                                                                                  |
| 46 |                                                           |     |                                                                                                                                                                                                                                                                  |
| 47 |                                                           | 11b | Criteria for discontinuing or modifying allocated interventions for a given trial participant (eg, drug dose change in response to harms, participant request, or improving/worsening disease).                                                                  |
| 48 |                                                           |     | <b>Page 17</b>                                                                                                                                                                                                                                                   |
| 49 |                                                           |     |                                                                                                                                                                                                                                                                  |
| 50 |                                                           |     |                                                                                                                                                                                                                                                                  |
| 51 |                                                           |     |                                                                                                                                                                                                                                                                  |
| 52 |                                                           |     |                                                                                                                                                                                                                                                                  |
| 53 |                                                           | 11c | Strategies to improve adherence to intervention protocols, and any procedures for monitoring adherence (eg, drug tablet return, laboratory tests).                                                                                                               |
| 54 |                                                           |     | <b>N/A</b>                                                                                                                                                                                                                                                       |
| 55 |                                                           |     |                                                                                                                                                                                                                                                                  |
| 56 |                                                           |     |                                                                                                                                                                                                                                                                  |
| 57 |                                                           |     |                                                                                                                                                                                                                                                                  |
| 58 |                                                           |     |                                                                                                                                                                                                                                                                  |
| 59 |                                                           |     |                                                                                                                                                                                                                                                                  |
| 60 |                                                           |     |                                                                                                                                                                                                                                                                  |

|    |                      |     |                                                                                                                                                                                                                                                                                                                                                                                |
|----|----------------------|-----|--------------------------------------------------------------------------------------------------------------------------------------------------------------------------------------------------------------------------------------------------------------------------------------------------------------------------------------------------------------------------------|
| 1  |                      |     |                                                                                                                                                                                                                                                                                                                                                                                |
| 2  |                      | 11d | Relevant concomitant care and interventions that are permitted or prohibited during the trial                                                                                                                                                                                                                                                                                  |
| 3  |                      |     | <b>N/A</b>                                                                                                                                                                                                                                                                                                                                                                     |
| 4  |                      |     |                                                                                                                                                                                                                                                                                                                                                                                |
| 5  |                      |     |                                                                                                                                                                                                                                                                                                                                                                                |
| 6  | Outcomes             | 12  | Primary, secondary, and other outcomes, including the specific measurement variable (eg, systolic blood pressure), analysis metric (eg, change from baseline, final value, time to event), method of aggregation (eg, median, proportion), and time point for each outcome. Explanation of the clinical relevance of chosen efficacy and harm outcomes is strongly recommended |
| 7  |                      |     | <b>Page 14 (outcome measures)</b>                                                                                                                                                                                                                                                                                                                                              |
| 8  |                      |     |                                                                                                                                                                                                                                                                                                                                                                                |
| 9  |                      |     |                                                                                                                                                                                                                                                                                                                                                                                |
| 10 |                      |     |                                                                                                                                                                                                                                                                                                                                                                                |
| 11 |                      |     |                                                                                                                                                                                                                                                                                                                                                                                |
| 12 |                      |     |                                                                                                                                                                                                                                                                                                                                                                                |
| 13 |                      |     |                                                                                                                                                                                                                                                                                                                                                                                |
| 14 |                      |     |                                                                                                                                                                                                                                                                                                                                                                                |
| 15 | Participant timeline | 13  | Time schedule of enrolment, interventions (including any run-ins and washouts), assessments, and visits for participants. A schematic diagram is highly recommended (see Figure)                                                                                                                                                                                               |
| 16 |                      |     | <b>Figure 1</b>                                                                                                                                                                                                                                                                                                                                                                |
| 17 |                      |     |                                                                                                                                                                                                                                                                                                                                                                                |
| 18 |                      |     |                                                                                                                                                                                                                                                                                                                                                                                |
| 19 |                      |     |                                                                                                                                                                                                                                                                                                                                                                                |
| 20 |                      |     |                                                                                                                                                                                                                                                                                                                                                                                |
| 21 | Sample size          | 14  | Estimated number of participants needed to achieve study objectives and how it was determined, including clinical and statistical assumptions supporting any sample size calculations                                                                                                                                                                                          |
| 22 |                      |     | <b>Page 15 (Sample Size and Power Analysis).</b>                                                                                                                                                                                                                                                                                                                               |
| 23 |                      |     |                                                                                                                                                                                                                                                                                                                                                                                |
| 24 |                      |     |                                                                                                                                                                                                                                                                                                                                                                                |
| 25 |                      |     |                                                                                                                                                                                                                                                                                                                                                                                |
| 26 |                      |     |                                                                                                                                                                                                                                                                                                                                                                                |
| 27 | Recruitment          | 15  | Strategies for achieving adequate participant enrolment to reach target sample size.                                                                                                                                                                                                                                                                                           |
| 28 |                      |     | <b>Page 9 (Recruitment)</b>                                                                                                                                                                                                                                                                                                                                                    |
| 29 |                      |     |                                                                                                                                                                                                                                                                                                                                                                                |
| 30 |                      |     |                                                                                                                                                                                                                                                                                                                                                                                |

### Methods: Assignment of interventions (for controlled trials)

#### Allocation:

|    |                                  |     |                                                                                                                                                                                                                                                                                                                                                          |
|----|----------------------------------|-----|----------------------------------------------------------------------------------------------------------------------------------------------------------------------------------------------------------------------------------------------------------------------------------------------------------------------------------------------------------|
| 31 |                                  |     |                                                                                                                                                                                                                                                                                                                                                          |
| 32 |                                  |     |                                                                                                                                                                                                                                                                                                                                                          |
| 33 |                                  |     |                                                                                                                                                                                                                                                                                                                                                          |
| 34 |                                  |     |                                                                                                                                                                                                                                                                                                                                                          |
| 35 | Sequence generation              | 16a | Method of generating the allocation sequence (eg, computer-generated random numbers), and list of any factors for stratification. To reduce predictability of a random sequence, details of any planned restriction (eg, blocking) should be provided in a separate document that is unavailable to those who enrol participants or assign interventions |
| 36 |                                  |     | <b>Page 10 (Randomisation and Blinding).</b>                                                                                                                                                                                                                                                                                                             |
| 37 |                                  |     |                                                                                                                                                                                                                                                                                                                                                          |
| 38 |                                  |     |                                                                                                                                                                                                                                                                                                                                                          |
| 39 |                                  |     |                                                                                                                                                                                                                                                                                                                                                          |
| 40 |                                  |     |                                                                                                                                                                                                                                                                                                                                                          |
| 41 |                                  |     |                                                                                                                                                                                                                                                                                                                                                          |
| 42 |                                  |     |                                                                                                                                                                                                                                                                                                                                                          |
| 43 |                                  |     |                                                                                                                                                                                                                                                                                                                                                          |
| 44 |                                  |     |                                                                                                                                                                                                                                                                                                                                                          |
| 45 | Allocation concealment mechanism | 16b | Mechanism of implementing the allocation sequence (eg, central telephone; sequentially numbered, opaque, sealed envelopes), describing any steps to conceal the sequence until interventions are assigned                                                                                                                                                |
| 46 |                                  |     | <b>Page 10 (Randomisation and Blinding).</b>                                                                                                                                                                                                                                                                                                             |
| 47 |                                  |     |                                                                                                                                                                                                                                                                                                                                                          |
| 48 |                                  |     |                                                                                                                                                                                                                                                                                                                                                          |
| 49 |                                  |     |                                                                                                                                                                                                                                                                                                                                                          |
| 50 |                                  |     |                                                                                                                                                                                                                                                                                                                                                          |
| 51 |                                  |     |                                                                                                                                                                                                                                                                                                                                                          |
| 52 | Implementation                   | 16c | Who will generate the allocation sequence, who will enrol participants, and who will assign participants to interventions                                                                                                                                                                                                                                |
| 53 |                                  |     | <b>Page 10 (Randomisation and Blinding).</b>                                                                                                                                                                                                                                                                                                             |
| 54 |                                  |     |                                                                                                                                                                                                                                                                                                                                                          |
| 55 |                                  |     |                                                                                                                                                                                                                                                                                                                                                          |
| 56 |                                  |     |                                                                                                                                                                                                                                                                                                                                                          |
| 57 |                                  |     |                                                                                                                                                                                                                                                                                                                                                          |
| 58 |                                  |     |                                                                                                                                                                                                                                                                                                                                                          |
| 59 |                                  |     |                                                                                                                                                                                                                                                                                                                                                          |
| 60 |                                  |     |                                                                                                                                                                                                                                                                                                                                                          |

- 1  
2  
3  
4  
5  
6  
7  
8  
9  
10  
11  
12
- Blinding (masking) 17a Who will be blinded after assignment to interventions (eg, trial participants, care providers, outcome assessors, data analysts), and how.  
**Page 10 (Randomisation and Blinding).**
- 17b If blinded, circumstances under which unblinding is permissible, and procedure for revealing a participant's allocated intervention during the trial  
**N/A**

13  
14

### Methods: Data collection, management, and analysis

- 15  
16  
17  
18  
19  
20  
21  
22  
23  
24  
25  
26  
27  
28  
29  
30  
31  
32
- Data collection methods 18a Plans for assessment and collection of outcome, baseline, and other trial data, including any related processes to promote data quality (eg, duplicate measurements, training of assessors) and a description of study instruments (eg, questionnaires, laboratory tests) along with their reliability and validity, if known. Reference to where data collection forms can be found, if not in the protocol  
**Page 9 (Recruitment); Page 10 (Smartphone-Delivered Wound Assessment Tool); Table 1**
- 18b Plans to promote participant retention and complete follow-up, including list of any outcome data to be collected for participants who discontinue or deviate from intervention protocols  
**Page 10 (Smartphone-Delivered Wound Assessment Tool); Page 13 (Data analysis plan)**
- 33  
34  
35  
36  
37  
38  
39
- Data management 19 Plans for data entry, coding, security, and storage, including any related processes to promote data quality (eg, double data entry; range checks for data values). Reference to where details of data management procedures can be found, if not in the protocol.  
**Page 16 (Data Protection and Management).**
- 40  
41  
42  
43  
44  
45  
46  
47  
48  
49  
50  
51  
52  
53  
54  
55  
56  
57  
58  
59  
60
- Statistical methods 20a Statistical methods for analysing primary and secondary outcomes. Reference to where other details of the statistical analysis plan can be found, if not in the protocol.  
**Page 13 (Data Analysis Plan / Outcome Measures)**
- 20b Methods for any additional analyses (eg, subgroup and adjusted analyses)  
**Page 13 (Data Analysis Plan / Outcome Measures)**
- 20c Definition of analysis population relating to protocol non-adherence (eg, as randomised analysis), and any statistical methods to handle missing data (eg, multiple imputation)  
**Page 13 (Data Analysis Plan / Outcome Measures)**



### Methods: Monitoring

|                                 |     |                                                                                                                                                                                                                                                                                                                                                                  |
|---------------------------------|-----|------------------------------------------------------------------------------------------------------------------------------------------------------------------------------------------------------------------------------------------------------------------------------------------------------------------------------------------------------------------|
| Data monitoring                 | 21a | Composition of data monitoring committee (DMC); summary of its role and reporting structure; statement of whether it is independent from the sponsor and competing interests; and reference to where further details about its charter can be found, if not in the protocol. Alternatively, an explanation of why a DMC is not needed<br><b>Page 16 (safety)</b> |
|                                 | 21b | Description of any interim analyses and stopping guidelines, including who will have access to these interim results and make the final decision to terminate the trial<br><b>N/A</b>                                                                                                                                                                            |
| Harms                           | 22  | Plans for collecting, assessing, reporting, and managing solicited and spontaneously reported adverse events and other unintended effects of trial interventions or trial conduct<br><b>Page 16 (safety)</b>                                                                                                                                                     |
| Auditing                        | 23  | Frequency and procedures for auditing trial conduct, if any, and whether the process will be independent from investigators and the sponsor<br><b>N/A</b>                                                                                                                                                                                                        |
| <b>Ethics and dissemination</b> |     |                                                                                                                                                                                                                                                                                                                                                                  |
| Research ethics approval        | 24  | Plans for seeking research ethics committee/institutional review board (REC/IRB) approval<br><b>Page 17 (Ethical Approval and Dissemination Plan)</b>                                                                                                                                                                                                            |
| Protocol amendments             | 25  | Plans for communicating important protocol modifications (eg, changes to eligibility criteria, outcomes, analyses) to relevant parties (eg, investigators, REC/IRBs, trial participants, trial registries, journals, regulators)<br><b>Page 17 (Ethical Approval and Dissemination Plan)</b>                                                                     |
| Consent or assent               | 26a | Who will obtain informed consent or assent from potential trial participants or authorised surrogates, and how (see Item 32)<br><b>Page 17 (Ethical Approval and Dissemination Plan)</b>                                                                                                                                                                         |
|                                 | 26b | Additional consent provisions for collection and use of participant data and biological specimens in ancillary studies, if applicable<br><b>N/A</b>                                                                                                                                                                                                              |
| Confidentiality                 | 27  | How personal information about potential and enrolled participants will be collected, shared, and maintained in order to protect confidentiality before, during, and after the trial<br><b>Page 16 (Data Protection and Management)</b>                                                                                                                          |

|    |                   |     |                                                                              |
|----|-------------------|-----|------------------------------------------------------------------------------|
| 1  |                   |     |                                                                              |
| 2  | Declaration of    | 28  | Financial and other competing interests for principal investigators for      |
| 3  | interests         |     | the overall trial and each study site                                        |
| 4  |                   |     | <b>Page 18</b>                                                               |
| 5  |                   |     |                                                                              |
| 6  | Access to data    | 29  | Statement of who will have access to the final trial dataset, and            |
| 7  |                   |     | disclosure of contractual agreements that limit such access for              |
| 8  |                   |     | investigators                                                                |
| 9  |                   |     | <b>Page 16 (Data Protection and Management)</b>                              |
| 10 |                   |     |                                                                              |
| 11 | Ancillary and     | 30  | Provisions, if any, for ancillary and post-trial care, and for               |
| 12 | post-trial care   |     | compensation to those who suffer harm from trial participation               |
| 13 |                   |     | <b>N/A</b>                                                                   |
| 14 |                   |     |                                                                              |
| 15 |                   |     |                                                                              |
| 16 | Dissemination     | 31a | Plans for investigators and sponsor to communicate trial results to          |
| 17 | policy            |     | participants, healthcare professionals, the public, and other relevant       |
| 18 |                   |     | groups (eg, via publication, reporting in results databases, or other        |
| 19 |                   |     | data sharing arrangements), including any publication restrictions           |
| 20 |                   |     | <b>Page 17 (Ethical Approval and Dissemination Plan)</b>                     |
| 21 |                   |     |                                                                              |
| 22 |                   |     |                                                                              |
| 23 |                   | 31b | Authorship eligibility guidelines and any intended use of professional       |
| 24 |                   |     | writers                                                                      |
| 25 |                   |     | <b>Page 17 (Ethical Approval and Dissemination Plan)</b>                     |
| 26 |                   |     |                                                                              |
| 27 |                   |     |                                                                              |
| 28 |                   | 31c | Plans, if any, for granting public access to the full protocol, participant- |
| 29 |                   |     | level dataset, and statistical code                                          |
| 30 |                   |     | <b>N/A</b>                                                                   |
| 31 |                   |     |                                                                              |
| 32 |                   |     |                                                                              |
| 33 | <b>Appendices</b> |     |                                                                              |
| 34 |                   |     |                                                                              |
| 35 | Informed consent  | 32  | Model consent form and other related documentation given to                  |
| 36 | materials         |     | participants and authorised surrogates                                       |
| 37 |                   |     | <b>Supplementary File</b>                                                    |
| 38 |                   |     |                                                                              |
| 39 | Biological        | 33  | Plans for collection, laboratory evaluation, and storage of biological       |
| 40 | specimens         |     | specimens for genetic or molecular analysis in the current trial and for     |
| 41 |                   |     | future use in ancillary studies, if applicable                               |
| 42 |                   |     | <b>N/A</b>                                                                   |
| 43 |                   |     |                                                                              |

---

\*It is strongly recommended that this checklist be read in conjunction with the SPIRIT 2013 Explanation & Elaboration for important clarification on the items. Amendments to the protocol should be tracked and dated. The SPIRIT checklist is copyrighted by the SPIRIT Group under the Creative Commons "[Attribution-NonCommercial-NoDerivs 3.0 Unported](https://creativecommons.org/licenses/by-nc-nd/3.0/)" license.
